# Supplementary material
Source: PubMed Central journal article supplement (PMC3985861)
Supplement: cs401023j_si_001.pdf [file cs401023j_si_001.pdf]

## Supporting Information for

### Mechanistic Insights into Carbonyl-Directed Rhodium-Catalyzed Hydroboration: ab Initio Study of a Cyclic $\gamma,\delta$ -Unsaturated Amide.

Zhao-Di Yang,<sup>†‡</sup> Rhitankar Pal,<sup>§</sup> Gia L. Hoang,<sup>‡</sup> Xiao Cheng Zeng,<sup>\*‡</sup> and James M. Takacs<sup>\*‡</sup>

<sup>†</sup> Key Laboratory of Green Chemical Engineering and Technology of College of Heilongjiang Province, College of Chemical and Environmental Engineering, Harbin University of Science and Technology, Harbin 150040, P. R. China

<sup>‡</sup> Department of Chemistry, University of Nebraska-Lincoln, Lincoln, NE 68588, United States

<sup>§</sup> Department of Chemistry, Yale University, New Haven, CT 06518, United States

Email: [jtakacs1@unl.edu](mailto:jtakacs1@unl.edu); [xzeng1@unl.edu](mailto:xzeng1@unl.edu)

**General procedures.** The reaction was carried out in a dry nitrogen atmosphere. Tetrahydrofuran (THF) was freshly distilled from sodium metal and benzophenone. HPLC solvents were filtered through Millipore filter paper. When indicated in the following procedures, THF was degassed by freezing under reduced pressure followed by a dry nitrogen atmosphere thaw (3–4 times). 4,4,6-Trimethyl-1,3,2-dioxaborinane (tmdBH) was distilled immediately before use. The synthesized compound was purified with flash chromatography using EMD Silica Gel 60 Geduran®. Thin Layer Chromatography analysis was performed on Analtech Silica Gel HLF (0.25 mm) precoated analytical plates and visualized with use of handheld short wavelength UV light, Iodine stain (I<sub>2</sub> and EMD Silica Gel 60 Geduran®) and Vanillin stain (Ethanol, H<sub>2</sub>SO<sub>4</sub>, and vanillin). HPLC analysis was performed with use of an ISCO model 2360 HPLC and Chiral Technologies, Inc. chiral HPLC column (Chiralpak-IC; column: 4.6 x 250 mm). NMR spectra were recorded on 400 MHz Bruker Advance NMR spectrometers using residue CHCl<sub>3</sub> ( $\delta$  7.27 ppm) or CDCl<sub>3</sub> ( $\delta$  77.0 ppm) for reference unless otherwise specified. Peaks are expressed as m (unresolved multiplet), q (quartet), t (triplet), d (doublet) or s (singlet). IR spectrum was recorded using an Avatar 360 FT-IR. Optical rotation was measured as solutions, 1.0 g/100 mL in chloroform unless indicated otherwise, and recorded using an Autopol III automatic polarimeter. HRMS analysis was performed by the Nebraska Center for Mass Spectrometry.

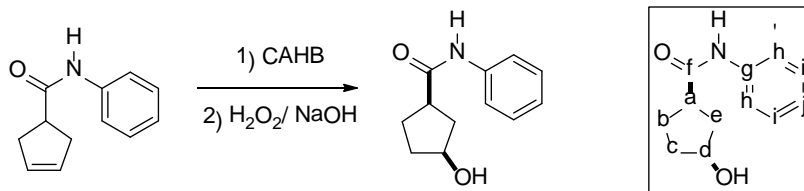

**Preparation of (1R,3S)-3-hydroxycyclopentanecarboxylic acid phenyl amide.** To a yellow solution of Rh(nbd)<sub>2</sub>BF<sub>4</sub> (2.0 mg, 0.0053 mmol) and (R,R)-L1 (4.7 mg, 0.011 mmol) in THF (2.0 mL)

was added  $\gamma,\delta$ -unsaturated amide **1** (99 mg, 0.53 mmol) as a solution in THF (2.0 mL). To the resulting solution was slowly added (i.e., dropwise over the course of 0.5 h) a solution of 4,4,6-trimethyl-1,3,2-dioxaborinane (tmdBH, **7**, 135 mg, 1.10 mmol) in THF (1.0 mL). The mixture was then stirred at 40 °C for 20 h. After cooling to room temperature, the resultant mixture was diluted with THF (10 mL) followed by addition of methanol (8 mL), sodium hydroxide (6 mL of a 3.0 M soln.), and the slow addition of H<sub>2</sub>O<sub>2</sub> (1.0 mL of a 30% solution). The resulting mixture stirred (2 h) and then extracted with dichloromethane (3 x 15 mL). The combined organic extracts were dried (anhyd. Na<sub>2</sub>SO<sub>4</sub>) and concentrated under reduced pressure. Flash chromatography on silica gel (80–40:20–60 hexanes:ethyl acetate) affords the title compound (86.6 mg, 80%) as a white solid: mp 100.0–101.5 °C; TLC analysis *R<sub>f</sub>* 0.4 (50:50 hexanes:ethyl acetate); [ $\alpha$ ]<sub>D</sub><sup>20</sup> = -0.14° (*c* 1.0, CHCl<sub>3</sub>); Chiral HPLC analysis (Chiralpak-IC, 80:20 hexanes:isopropanol, flow rate = 1.0 mL/min) showed peaks at 56 minutes (3.0% (1*S*,3*R*)) and 64 minutes (97.0% (1*R*,3*S*)) (see traces for racemate and enriched below); <sup>1</sup>H NMR (400 MHz, CDCl<sub>3</sub>)  $\delta$  8.84 (1H, br s, NH), 7.54 (2H, d, *J* = 7.9 Hz, h,h'), 7.31 (2H, t, *J* = 7.8 Hz, i,i'), 7.11 (1H, t, *J* = 7.3 Hz, j), 4.56 (1H, d, *J* = 6.6 Hz, d), 4.40 (1H, br s, OH), 3.05–2.90 (1H, m, a), 2.20–1.90 (5H, m, b,c,e), 1.80–1.65 (1H, m, c); <sup>13</sup>C NMR (100 MHz, CDCl<sub>3</sub>)  $\delta$  177.41 (f), 138.18 (a), 128.93 (i,i'), 124.32 (j), 120.11 (h,h'), 73.89 (d), 45.28 (a), 38.94 (e), 36.50 (b), 29.20 (c); IR (neat) 3677 (N-H stretch, O-H stretch), 2907, 2803, 1728 (C=O stretch), 1663, 1597 (N-H bend), 1565, 1389 (C-N stretch), 1238 (C-OH bend), 1050 (C-OH stretch) cm<sup>-1</sup>; HRMS (ESI) calcd. for C<sub>12</sub>H<sub>15</sub>NNaO<sub>2</sub> (M+Na): 228.1000, found 228.1002 *m/z*.

#### Chiral HPLC:

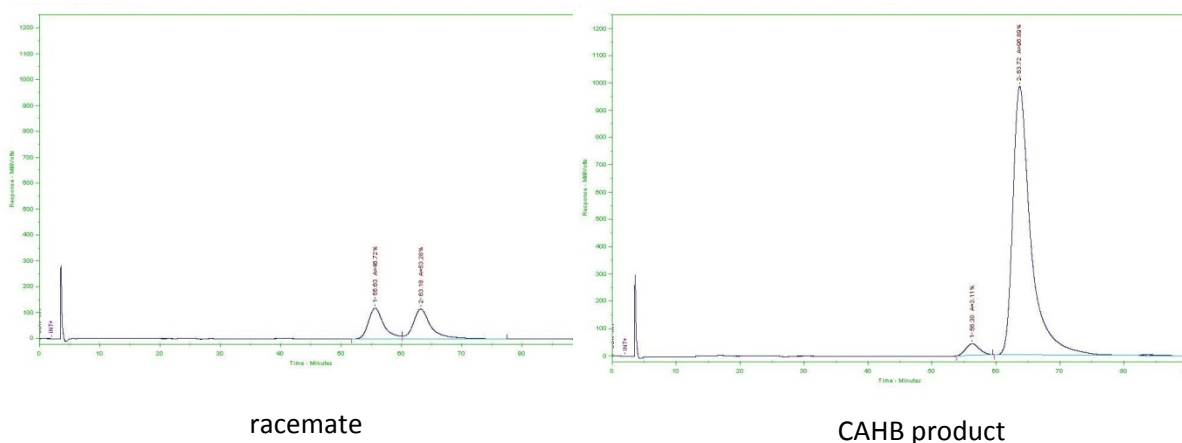

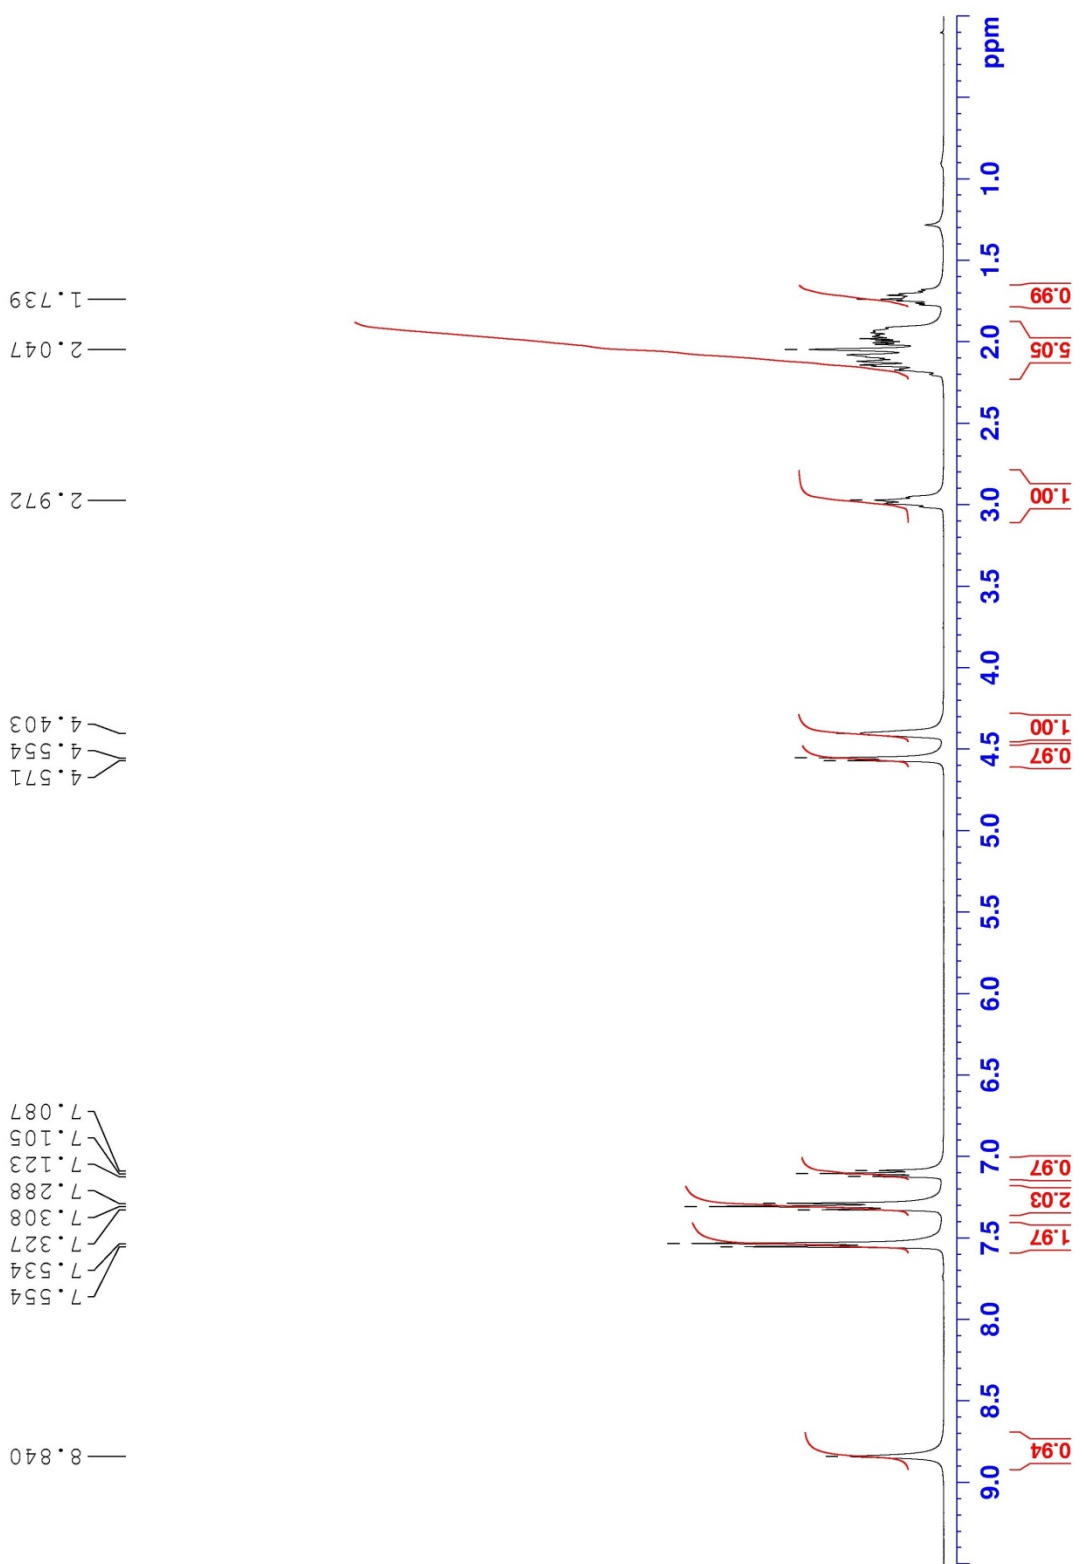

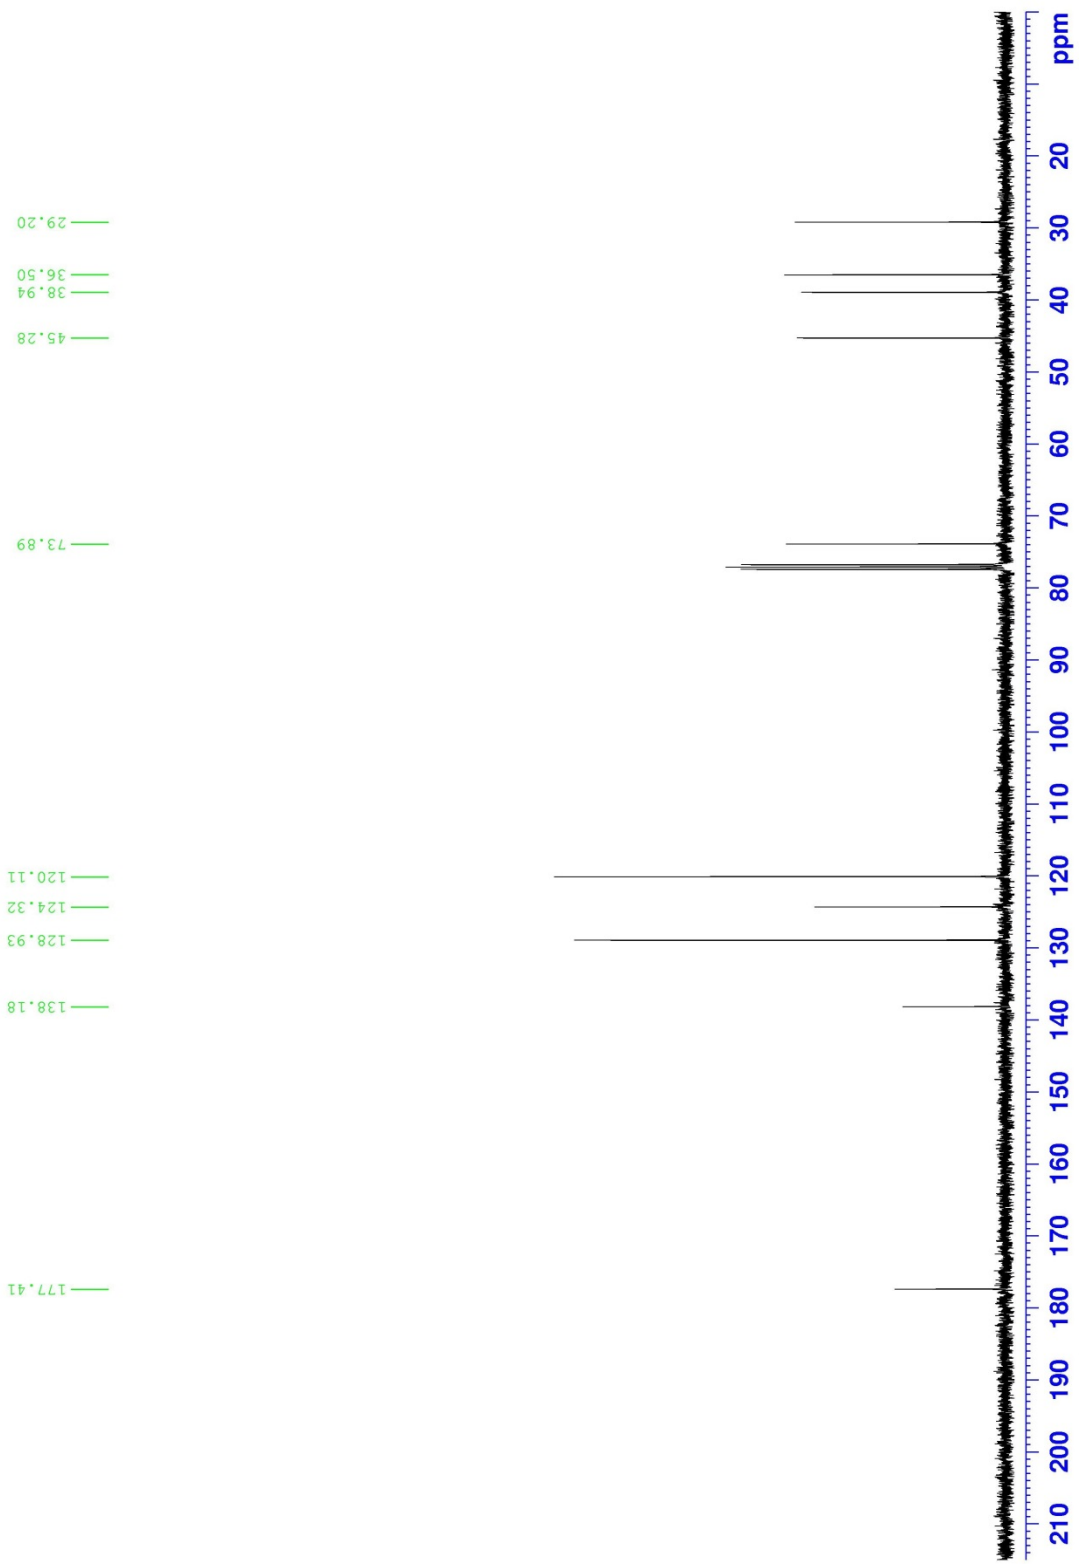



Table S-1 Relative Free Energies after correction according formula (1) and Relative Energies before correction

|                                                                | After correction<br>$\Delta G/\text{kcal/mol}$ | Before correction<br>$\Delta E/\text{kcal/mol}$ |
|----------------------------------------------------------------|------------------------------------------------|-------------------------------------------------|
| Reactants= $[\text{RhL}_2\text{S}_2]^+$ + Substrate +<br>PinBH | 0                                              | 0                                               |
| Im0+PinBH+2THF                                                 | -10.59                                         | 1.46                                            |
| TS1+2THF                                                       | 17.19                                          | 18.75                                           |
| Im1+2THF                                                       | 5.17                                           | 7.81                                            |
| TS2+2THF                                                       | 6.40                                           | 9.98                                            |
| Im2+2THF                                                       | 1.96                                           | 2.20                                            |
| TS3+THF                                                        | 21.23                                          | 4.31                                            |
| Im3+THF                                                        | 20.82                                          | 2.57                                            |
| TS4+THF                                                        | 41.83                                          | 22.34                                           |
| Im4+THF                                                        | -3.78                                          | -20.61                                          |
| TS5+2THF                                                       | 9.70                                           | 8.58                                            |
| Im5+2THF                                                       | 4.19                                           | 3.80                                            |
| TS6+2THF                                                       | 20.94                                          | 18.53                                           |
| Im6+2THF                                                       | -2.19                                          | -2.58                                           |
| TS7+2THF                                                       | 28.50                                          | 27.31                                           |
| Im7+2THF                                                       | -1.63                                          | -2.49                                           |
| TS8+2THF                                                       | 23.30                                          | 25.06                                           |
| Im8+2THF                                                       | 8.75                                           | 13.05                                           |
| TS9+2THF                                                       | 15.99                                          | 18.78                                           |
| Im9+2THF                                                       | 6.53                                           | 6.24                                            |
| TS10+2THF                                                      | 25.94                                          | 27.27                                           |
| Im10+2THF                                                      | -0.61                                          | -1.74                                           |
| Products =Major product + $[\text{RhL}_2\text{S}_2]^+$         | -5.67                                          | -24.42                                          |

Note: The data with red color show that dramatic relative energy difference was observed in the elementary process that involves either the formation of adduct or the release of product.

Cartesian coordinates of all studied molecules calculated by 6-31+G\*\*/LANL2DZ basis set using B3LYP functional with DFT in model reaction.

Substrate

|   |   |           |           |           |
|---|---|-----------|-----------|-----------|
| 8 | 0 | 0.654143  | 1.463297  | -0.000359 |
| 6 | 0 | 0.732958  | 0.238681  | -0.001490 |
| 7 | 0 | -0.362413 | -0.596558 | -0.001884 |
| 1 | 0 | -0.158613 | -1.586015 | -0.003190 |
| 6 | 0 | 2.081035  | -0.476514 | -0.002208 |
| 1 | 0 | 1.935774  | -1.563987 | -0.005788 |
| 6 | 0 | 2.952415  | -0.107348 | 1.237072  |
| 1 | 0 | 2.662119  | 0.873727  | 1.636211  |
| 1 | 0 | 2.836634  | -0.835464 | 2.048664  |
| 6 | 0 | 2.955553  | -0.099541 | -1.236773 |
| 1 | 0 | 2.666164  | 0.884052  | -1.630315 |
| 1 | 0 | 2.841845  | -0.822464 | -2.053288 |

|   |   |           |           |           |
|---|---|-----------|-----------|-----------|
| 6 | 0 | 4.354712  | -0.055309 | -0.666386 |
| 6 | 0 | 4.353026  | -0.059616 | 0.670539  |
| 1 | 0 | 5.236178  | 0.015715  | 1.298050  |
| 1 | 0 | 5.239472  | 0.023982  | -1.291139 |
| 6 | 0 | -1.738795 | -0.274669 | -0.000813 |
| 6 | 0 | -2.647447 | -1.347222 | -0.002450 |
| 6 | 0 | -2.224683 | 1.042696  | 0.001882  |
| 6 | 0 | -4.020447 | -1.111117 | -0.001363 |
| 1 | 0 | -2.275582 | -2.369757 | -0.004582 |
| 6 | 0 | -3.604737 | 1.262097  | 0.002940  |
| 1 | 0 | -1.527656 | 1.868572  | 0.003032  |
| 6 | 0 | -4.509616 | 0.198575  | 0.001355  |
| 1 | 0 | -4.706654 | -1.953029 | -0.002662 |
| 1 | 0 | -3.970654 | 2.284912  | 0.005038  |
| 1 | 0 | -5.579119 | 0.385003  | 0.002203  |

PinBH

|   |   |           |           |           |
|---|---|-----------|-----------|-----------|
| 8 | 0 | -1.084283 | 1.203226  | -0.370068 |
| 8 | 0 | 1.084828  | 1.203310  | 0.369197  |
| 6 | 0 | -0.789672 | -0.192089 | -0.045848 |
| 6 | 0 | 0.789542  | -0.192499 | 0.045820  |
| 6 | 0 | 1.376622  | -1.075178 | 1.145197  |
| 1 | 0 | 1.010678  | -0.790311 | 2.133367  |
| 1 | 0 | 1.131465  | -2.128384 | 0.970161  |
| 1 | 0 | 2.466065  | -0.976584 | 1.147596  |
| 6 | 0 | 1.483031  | -0.485652 | -1.291089 |
| 1 | 0 | 1.359962  | -1.532492 | -1.585327 |
| 1 | 0 | 1.094935  | 0.149250  | -2.092641 |
| 1 | 0 | 2.552153  | -0.280460 | -1.186044 |
| 6 | 0 | -1.377077 | -1.075621 | -1.144509 |
| 1 | 0 | -1.132162 | -2.128726 | -0.968600 |
| 1 | 0 | -2.466491 | -0.976701 | -1.146920 |
| 1 | 0 | -1.011153 | -0.791613 | -2.132935 |
| 6 | 0 | -1.483145 | -0.484341 | 1.291338  |
| 1 | 0 | -2.552191 | -0.278673 | 1.186367  |
| 1 | 0 | -1.360483 | -1.531084 | 1.586030  |
| 1 | 0 | -1.094601 | 0.150818  | 2.092478  |
| 5 | 0 | 0.000264  | 1.951283  | -0.000194 |
| 1 | 0 | 0.000331  | 3.138537  | -0.001046 |

THF

|   |   |           |           |           |
|---|---|-----------|-----------|-----------|
| 8 | 0 | -0.000185 | -1.252863 | -0.000013 |
| 6 | 0 | -1.171077 | -0.429237 | 0.131164  |
| 6 | 0 | 1.170947  | -0.429563 | -0.131150 |
| 6 | 0 | -0.734625 | 0.997030  | -0.225453 |
| 1 | 0 | -1.948396 | -0.824792 | -0.531255 |
| 1 | 0 | -1.536138 | -0.487728 | 1.167112  |
| 6 | 0 | 0.734916  | 0.996835  | 0.225445  |
| 1 | 0 | 1.948140  | -0.825312 | 0.531300  |
| 1 | 0 | 1.536051  | -0.488151 | -1.167079 |
| 1 | 0 | -1.341747 | 1.760404  | 0.270349  |

|   |   |           |          |           |
|---|---|-----------|----------|-----------|
| 1 | 0 | -0.801367 | 1.159138 | -1.307639 |
| 1 | 0 | 0.801691  | 1.158920 | 1.307632  |
| 1 | 0 | 1.342272  | 1.760030 | -0.270351 |

[RhL<sub>2</sub>S<sub>2</sub>]<sup>+</sup>

|    |   |           |           |           |
|----|---|-----------|-----------|-----------|
| 15 | 0 | 1.562043  | -1.010790 | -0.005684 |
| 8  | 0 | 1.194060  | -2.598410 | -0.039513 |
| 8  | 0 | 2.617407  | -0.879125 | -1.256056 |
| 8  | 0 | 2.588399  | -0.926729 | 1.273031  |
| 6  | 0 | 2.326369  | -3.519093 | -0.047831 |
| 6  | 0 | 3.732053  | -1.823981 | -1.249593 |
| 6  | 0 | 3.698937  | -1.876303 | 1.260965  |
| 6  | 0 | 3.645129  | -2.732282 | -0.013641 |
| 1  | 0 | 2.242265  | -4.124451 | -0.955378 |
| 1  | 0 | 2.220733  | -4.166346 | 0.827950  |
| 1  | 0 | 3.672427  | -2.399735 | -2.178095 |
| 1  | 0 | 4.655680  | -1.236769 | -1.252756 |
| 1  | 0 | 4.624083  | -1.294226 | 1.315522  |
| 1  | 0 | 3.609513  | -2.489674 | 2.162627  |
| 1  | 0 | 4.487117  | -3.433821 | -0.017096 |
| 15 | 0 | -1.645615 | -0.957659 | -0.007137 |
| 8  | 0 | -1.755535 | -1.956472 | -1.293064 |
| 8  | 0 | -1.738768 | -1.990359 | 1.253403  |
| 8  | 0 | -3.149623 | -0.290420 | 0.011937  |
| 6  | 0 | -2.871620 | -2.895717 | -1.281447 |
| 6  | 0 | -2.850226 | -2.934872 | 1.226663  |
| 6  | 0 | -4.256320 | -1.246661 | 0.010936  |
| 6  | 0 | -3.718961 | -2.687215 | -0.016551 |
| 1  | 0 | -2.447467 | -3.903785 | -1.319814 |
| 1  | 0 | -3.452624 | -2.717330 | -2.191407 |
| 1  | 0 | -2.421273 | -3.941678 | 1.223688  |
| 1  | 0 | -3.417299 | -2.790531 | 2.151264  |
| 1  | 0 | -4.847596 | -1.057656 | 0.912217  |
| 1  | 0 | -4.868047 | -1.031099 | -0.870535 |
| 1  | 0 | -4.561694 | -3.387836 | -0.020320 |
| 8  | 0 | 1.530419  | 2.073835  | 0.024665  |
| 6  | 0 | 2.262967  | 2.499929  | 1.215598  |
| 6  | 0 | 2.166883  | 2.575159  | -1.188411 |
| 6  | 0 | 3.547815  | 3.134272  | 0.682130  |
| 1  | 0 | 1.633499  | 3.221370  | 1.748168  |
| 1  | 0 | 2.426593  | 1.621014  | 1.841811  |
| 6  | 0 | 3.121667  | 3.661863  | -0.699469 |
| 1  | 0 | 2.686048  | 1.740613  | -1.670557 |
| 1  | 0 | 1.375675  | 2.940282  | -1.847480 |
| 1  | 0 | 4.333383  | 2.378039  | 0.577915  |
| 1  | 0 | 3.920840  | 3.920825  | 1.343112  |
| 1  | 0 | 3.964217  | 3.803863  | -1.381149 |
| 1  | 0 | 2.598036  | 4.618865  | -0.601076 |
| 45 | 0 | -0.017661 | 0.525885  | 0.005413  |
| 8  | 0 | -1.401742 | 2.213020  | 0.010600  |
| 6  | 0 | -2.082004 | 2.664221  | 1.224645  |



|   |   |           |          |           |
|---|---|-----------|----------|-----------|
| 6 | 0 | -2.125896 | 2.656334 | -1.172552 |
| 6 | 0 | -3.308671 | 3.445507 | 0.740656  |
| 1 | 0 | -2.335814 | 1.787940 | 1.824828  |
| 1 | 0 | -1.370509 | 3.289283 | 1.773294  |
| 6 | 0 | -2.921137 | 3.864109 | -0.689353 |
| 1 | 0 | -1.382884 | 2.879398 | -1.941233 |
| 1 | 0 | -2.776432 | 1.843169 | -1.511252 |
| 1 | 0 | -3.531030 | 4.297337 | 1.388227  |
| 1 | 0 | -4.188666 | 2.795286 | 0.719746  |
| 1 | 0 | -2.290293 | 4.759431 | -0.677326 |
| 1 | 0 | -3.788995 | 4.065825 | -1.322642 |

Major product

|   |   |           |           |           |
|---|---|-----------|-----------|-----------|
| 8 | 0 | 0.997108  | -0.141485 | 0.539458  |
| 6 | 0 | 1.534075  | 0.898752  | 0.165197  |
| 7 | 0 | 2.884268  | 1.004580  | -0.087305 |
| 1 | 0 | 3.200238  | 1.915051  | -0.390090 |
| 6 | 0 | 0.735723  | 2.175700  | -0.081321 |
| 1 | 0 | 1.424906  | 3.004822  | -0.282885 |
| 6 | 0 | 3.897075  | 0.022977  | -0.005282 |
| 6 | 0 | 5.199525  | 0.414605  | -0.361156 |
| 6 | 0 | 3.662828  | -1.298325 | 0.408467  |
| 6 | 0 | 6.252290  | -0.496218 | -0.307394 |
| 1 | 0 | 5.386186  | 1.437231  | -0.682401 |
| 6 | 0 | 4.729564  | -2.199550 | 0.456705  |
| 1 | 0 | 2.662492  | -1.600622 | 0.683398  |
| 6 | 0 | 6.023850  | -1.813230 | 0.102475  |
| 1 | 0 | 7.251188  | -0.174284 | -0.587178 |
| 1 | 0 | 4.537542  | -3.219395 | 0.778013  |
| 1 | 0 | 6.842486  | -2.525034 | 0.144802  |
| 6 | 0 | -0.240635 | 2.015026  | -1.301510 |
| 1 | 0 | -0.036118 | 2.812236  | -2.024695 |
| 1 | 0 | -0.098978 | 1.063425  | -1.821210 |
| 6 | 0 | -1.678595 | 2.164523  | -0.723865 |
| 1 | 0 | -2.318523 | 2.657969  | -1.470538 |
| 6 | 0 | -1.473010 | 3.068251  | 0.510589  |
| 1 | 0 | -2.308690 | 3.030868  | 1.215962  |
| 1 | 0 | -1.345718 | 4.114294  | 0.198811  |
| 6 | 0 | -0.169790 | 2.535634  | 1.129476  |
| 1 | 0 | -0.381261 | 1.624494  | 1.697724  |
| 1 | 0 | 0.313248  | 3.249669  | 1.804921  |
| 5 | 0 | -2.366463 | 0.776092  | -0.408951 |
| 8 | 0 | -2.944336 | 0.450805  | 0.794137  |
| 8 | 0 | -2.487344 | -0.223884 | -1.344953 |
| 6 | 0 | -3.651443 | -0.815363 | 0.631986  |
| 6 | 0 | -2.973269 | -1.420190 | -0.663505 |
| 6 | 0 | -5.134228 | -0.466544 | 0.444845  |
| 6 | 0 | -3.462045 | -1.637189 | 1.905517  |
| 6 | 0 | -1.742186 | -2.286218 | -0.366777 |
| 6 | 0 | -3.922382 | -2.159993 | -1.604767 |
| 1 | 0 | -5.752161 | -1.366227 | 0.362844  |

|   |   |           |           |           |
|---|---|-----------|-----------|-----------|
| 1 | 0 | -5.474465 | 0.106664  | 1.312195  |
| 1 | 0 | -5.292459 | 0.145444  | -0.448041 |
| 1 | 0 | -3.936304 | -1.121588 | 2.746108  |
| 1 | 0 | -3.928505 | -2.623506 | 1.805810  |
| 1 | 0 | -2.405391 | -1.771528 | 2.143144  |
| 1 | 0 | -1.020090 | -1.758720 | 0.261542  |
| 1 | 0 | -2.022443 | -3.227257 | 0.117491  |
| 1 | 0 | -1.246063 | -2.523505 | -1.312589 |
| 1 | 0 | -4.354552 | -3.036765 | -1.109924 |
| 1 | 0 | -4.734873 | -1.519302 | -1.953312 |
| 1 | 0 | -3.366770 | -2.506333 | -2.481238 |

Im0

|    |   |           |           |           |
|----|---|-----------|-----------|-----------|
| 45 | 0 | -0.482945 | -0.649202 | -0.000252 |
| 8  | 0 | 1.676515  | -0.835796 | 0.000279  |
| 6  | 0 | 2.311879  | -1.916846 | 0.002965  |
| 7  | 0 | 3.657449  | -1.963704 | 0.002187  |
| 1  | 0 | 4.051000  | -2.895719 | 0.004348  |
| 6  | 0 | 1.583369  | -3.245706 | 0.007050  |
| 1  | 0 | 2.301771  | -4.069676 | 0.009501  |
| 6  | 0 | 0.629614  | -3.323416 | -1.223830 |
| 1  | 0 | 0.995128  | -2.763218 | -2.090247 |
| 1  | 0 | 0.514101  | -4.368315 | -1.543271 |
| 6  | 0 | 0.629620  | -3.316124 | 1.238359  |
| 1  | 0 | 0.995164  | -2.750993 | 2.101547  |
| 1  | 0 | 0.513929  | -4.359151 | 1.563806  |
| 6  | 0 | -0.695448 | -2.823357 | 0.697683  |
| 6  | 0 | -0.695444 | -2.827473 | -0.686037 |
| 1  | 0 | -1.584921 | -2.819705 | -1.306761 |
| 1  | 0 | -1.584849 | -2.811934 | 1.318487  |
| 6  | 0 | 4.631527  | -0.923343 | -0.001737 |
| 6  | 0 | 5.973822  | -1.333119 | -0.004108 |
| 6  | 0 | 4.306278  | 0.439047  | -0.003028 |
| 6  | 0 | 6.994142  | -0.384690 | -0.007827 |
| 1  | 0 | 6.221578  | -2.392503 | -0.003108 |
| 6  | 0 | 5.344083  | 1.375713  | -0.006740 |
| 1  | 0 | 3.274184  | 0.760013  | -0.001026 |
| 6  | 0 | 6.682516  | 0.978267  | -0.009173 |
| 1  | 0 | 8.029165  | -0.711761 | -0.009666 |
| 1  | 0 | 5.096365  | 2.433135  | -0.007708 |
| 1  | 0 | 7.475128  | 1.719777  | -0.012058 |
| 15 | 0 | -2.690168 | -0.437927 | -0.002568 |
| 8  | 0 | -3.443317 | -1.165127 | -1.265472 |
| 8  | 0 | -3.446019 | -1.152981 | 1.265461  |
| 8  | 0 | -3.371661 | 1.042420  | -0.010591 |
| 6  | 0 | -4.903455 | -1.106641 | -1.256252 |
| 6  | 0 | -4.905973 | -1.090186 | 1.255181  |
| 6  | 0 | -4.831872 | 1.073195  | -0.014571 |
| 6  | 0 | -5.390528 | -0.357773 | -0.005877 |
| 1  | 0 | -5.268701 | -2.137969 | -1.275672 |
| 1  | 0 | -5.211342 | -0.600505 | -2.176012 |

|    |   |           |           |           |
|----|---|-----------|-----------|-----------|
| 1  | 0 | -5.273961 | -2.120116 | 1.289202  |
| 1  | 0 | -5.212757 | -0.570075 | 2.167510  |
| 1  | 0 | -5.142811 | 1.632501  | 0.872880  |
| 1  | 0 | -5.138585 | 1.620115  | -0.911188 |
| 1  | 0 | -6.485780 | -0.320132 | -0.007247 |
| 15 | 0 | -0.175083 | 1.654991  | 0.001746  |
| 8  | 0 | -0.793054 | 2.469948  | 1.274535  |
| 8  | 0 | 1.380831  | 2.168607  | 0.008359  |
| 8  | 0 | -0.782922 | 2.471777  | -1.274692 |
| 6  | 0 | -0.599105 | 3.916405  | 1.256177  |
| 6  | 0 | 1.560999  | 3.618875  | 0.013439  |
| 6  | 0 | -0.583425 | 3.917488  | -1.255930 |
| 6  | 0 | 0.195158  | 4.324535  | 0.005210  |
| 1  | 0 | -0.068719 | 4.182100  | 2.175518  |
| 1  | 0 | -1.592230 | 4.375909  | 1.269388  |
| 1  | 0 | 2.135532  | 3.868955  | 0.910636  |
| 1  | 0 | 2.148270  | 3.873142  | -0.874252 |
| 1  | 0 | -0.039485 | 4.180025  | -2.168260 |
| 1  | 0 | -1.574607 | 4.380437  | -1.283347 |
| 1  | 0 | 0.347041  | 5.409816  | 0.006602  |

Im1

|    |   |           |           |           |
|----|---|-----------|-----------|-----------|
| 45 | 0 | -0.270711 | -0.139737 | -0.693605 |
| 1  | 0 | -0.367729 | 0.746609  | -1.992649 |
| 5  | 0 | -2.312942 | 0.010279  | -0.753451 |
| 8  | 0 | -3.055965 | -0.697338 | -1.668608 |
| 8  | 0 | -3.083544 | 0.769542  | 0.085217  |
| 6  | 0 | -4.670599 | 2.026339  | -1.219191 |
| 1  | 0 | -3.984627 | 2.087560  | -2.068654 |
| 1  | 0 | -5.696278 | 2.102699  | -1.592736 |
| 1  | 0 | -4.480212 | 2.885301  | -0.569492 |
| 6  | 0 | -5.403647 | 0.714490  | 0.790837  |
| 1  | 0 | -6.446767 | 0.633618  | 0.466890  |
| 1  | 0 | -5.180428 | -0.116625 | 1.462178  |
| 1  | 0 | -5.297296 | 1.645118  | 1.355686  |
| 6  | 0 | -4.832609 | -1.840552 | -0.514317 |
| 1  | 0 | -5.888631 | -1.845938 | -0.227951 |
| 1  | 0 | -4.649416 | -2.711581 | -1.150476 |
| 1  | 0 | -4.221216 | -1.943114 | 0.386164  |
| 6  | 0 | -5.297015 | -0.486265 | -2.577122 |
| 1  | 0 | -5.206712 | -1.423588 | -3.133841 |
| 1  | 0 | -6.356808 | -0.334279 | -2.345884 |
| 1  | 0 | -4.962508 | 0.326550  | -3.224346 |
| 8  | 0 | 2.068141  | -0.302567 | -0.804936 |
| 6  | 0 | 2.697893  | -1.081052 | -1.542266 |
| 7  | 0 | 4.052879  | -1.111028 | -1.582908 |
| 1  | 0 | 4.456179  | -1.793127 | -2.211114 |
| 6  | 0 | 1.977552  | -2.063893 | -2.453392 |
| 1  | 0 | 2.706532  | -2.655812 | -3.013829 |
| 6  | 0 | 1.010528  | -1.312074 | -3.418198 |
| 1  | 0 | 1.342439  | -0.300670 | -3.666564 |

|    |   |           |           |           |
|----|---|-----------|-----------|-----------|
| 1  | 0 | 0.926408  | -1.865512 | -4.363545 |
| 6  | 0 | 1.036580  | -2.981617 | -1.615550 |
| 1  | 0 | 1.394761  | -3.153098 | -0.598229 |
| 1  | 0 | 0.950109  | -3.962972 | -2.102301 |
| 6  | 0 | -0.315077 | -2.293855 | -1.693305 |
| 6  | 0 | -0.333195 | -1.369721 | -2.719312 |
| 1  | 0 | -1.242905 | -1.015854 | -3.186952 |
| 1  | 0 | -1.213768 | -2.736410 | -1.279242 |
| 6  | 0 | 5.006584  | -0.349913 | -0.851130 |
| 6  | 0 | 6.353289  | -0.710680 | -1.015768 |
| 6  | 0 | 4.662442  | 0.717446  | -0.008989 |
| 6  | 0 | 7.354360  | -0.014441 | -0.341613 |
| 1  | 0 | 6.618411  | -1.537556 | -1.671305 |
| 6  | 0 | 5.680107  | 1.402598  | 0.661611  |
| 1  | 0 | 3.627304  | 1.004376  | 0.113463  |
| 6  | 0 | 7.021417  | 1.047410  | 0.504724  |
| 1  | 0 | 8.391861  | -0.303564 | -0.478048 |
| 1  | 0 | 5.413667  | 2.228192  | 1.315288  |
| 1  | 0 | 7.799023  | 1.590812  | 1.032227  |
| 15 | 0 | -0.164769 | 1.965409  | 0.160928  |
| 8  | 0 | -0.796283 | 2.294534  | 1.622028  |
| 8  | 0 | 1.372063  | 2.499787  | 0.328368  |
| 8  | 0 | -0.820076 | 3.131479  | -0.776567 |
| 6  | 0 | -0.597263 | 3.654374  | 2.107352  |
| 6  | 0 | 1.504811  | 3.889383  | 0.758521  |
| 6  | 0 | -0.713360 | 4.489465  | -0.253361 |
| 6  | 0 | 0.119050  | 4.493852  | 1.038440  |
| 1  | 0 | -0.010608 | 3.588412  | 3.029238  |
| 1  | 0 | -1.587261 | 4.057772  | 2.340370  |
| 1  | 0 | 2.128342  | 3.886418  | 1.657660  |
| 1  | 0 | 2.026269  | 4.428415  | -0.038614 |
| 1  | 0 | -0.245964 | 5.093956  | -1.036222 |
| 1  | 0 | -1.730090 | 4.854520  | -0.077192 |
| 1  | 0 | 0.235072  | 5.523262  | 1.395889  |
| 15 | 0 | -0.327796 | -1.371554 | 1.380308  |
| 8  | 0 | -1.666964 | -2.295456 | 1.612425  |
| 8  | 0 | 0.860607  | -2.484532 | 1.628975  |
| 8  | 0 | -0.261623 | -0.519088 | 2.772801  |
| 6  | 0 | -1.704746 | -3.066412 | 2.850617  |
| 6  | 0 | 0.802255  | -3.210531 | 2.893714  |
| 6  | 0 | -0.361744 | -1.288537 | 4.006391  |
| 6  | 0 | -0.444705 | -2.788775 | 3.686041  |
| 1  | 0 | -1.778385 | -4.123048 | 2.574213  |
| 1  | 0 | -2.612615 | -2.773040 | 3.386519  |
| 1  | 0 | 0.782001  | -4.277872 | 2.651896  |
| 1  | 0 | 1.722258  | -2.985608 | 3.442368  |
| 1  | 0 | 0.524224  | -1.054422 | 4.604511  |
| 1  | 0 | -1.253840 | -0.939639 | 4.536117  |
| 1  | 0 | -0.494016 | -3.360438 | 4.619666  |
| 6  | 0 | -4.464406 | 0.738384  | -0.412332 |
| 6  | 0 | -4.472269 | -0.571188 | -1.295318 |

Im2

|    |   |           |           |           |
|----|---|-----------|-----------|-----------|
| 5  | 0 | -2.267022 | -0.026966 | -0.623515 |
| 8  | 0 | -2.936108 | -0.251682 | -1.801354 |
| 8  | 0 | -3.081664 | 0.392506  | 0.391349  |
| 6  | 0 | -4.378229 | -0.166389 | -1.518992 |
| 6  | 0 | -4.405267 | 0.672536  | -0.179579 |
| 6  | 0 | -4.475476 | 2.187831  | -0.403780 |
| 1  | 0 | -3.706331 | 2.528720  | -1.102053 |
| 1  | 0 | -5.455600 | 2.487415  | -0.786847 |
| 1  | 0 | -4.313382 | 2.692253  | 0.553156  |
| 6  | 0 | -5.461753 | 0.241198  | 0.834455  |
| 1  | 0 | -6.469360 | 0.384336  | 0.429745  |
| 1  | 0 | -5.346395 | -0.805805 | 1.120560  |
| 1  | 0 | -5.371371 | 0.852216  | 1.737271  |
| 6  | 0 | -4.873659 | -1.607760 | -1.351815 |
| 1  | 0 | -5.953563 | -1.639211 | -1.178288 |
| 1  | 0 | -4.660902 | -2.165664 | -2.268384 |
| 1  | 0 | -4.371598 | -2.111918 | -0.521105 |
| 6  | 0 | -5.060594 | 0.493626  | -2.713928 |
| 1  | 0 | -4.962052 | -0.148229 | -3.594250 |
| 1  | 0 | -6.129261 | 0.633955  | -2.519268 |
| 1  | 0 | -4.619120 | 1.463584  | -2.950164 |
| 8  | 0 | 2.089203  | -0.362730 | -0.727830 |
| 6  | 0 | 2.737015  | -1.072128 | -1.520845 |
| 7  | 0 | 4.091533  | -1.102520 | -1.525757 |
| 1  | 0 | 4.510967  | -1.732907 | -2.196185 |
| 6  | 0 | 2.040518  | -1.937199 | -2.559021 |
| 1  | 0 | 2.775489  | -2.560359 | -3.077986 |
| 6  | 0 | 5.025587  | -0.407065 | -0.707170 |
| 6  | 0 | 6.368602  | -0.799831 | -0.818371 |
| 6  | 0 | 4.666372  | 0.633716  | 0.161249  |
| 6  | 0 | 7.351643  | -0.160297 | -0.065763 |
| 1  | 0 | 6.644888  | -1.606937 | -1.493595 |
| 6  | 0 | 5.665527  | 1.261644  | 0.910864  |
| 1  | 0 | 3.634921  | 0.946902  | 0.243824  |
| 6  | 0 | 7.003319  | 0.874918  | 0.806888  |
| 1  | 0 | 8.386836  | -0.473022 | -0.161572 |
| 1  | 0 | 5.387270  | 2.067211  | 1.584239  |
| 1  | 0 | 7.766638  | 1.374010  | 1.395536  |
| 15 | 0 | -0.040842 | 1.982658  | 0.284341  |
| 8  | 0 | -0.594894 | 2.373240  | 1.770600  |
| 8  | 0 | 1.490519  | 2.576798  | 0.341539  |
| 8  | 0 | -0.783717 | 3.109854  | -0.655711 |
| 6  | 0 | -0.463818 | 3.771657  | 2.156978  |
| 6  | 0 | 1.617881  | 3.964744  | 0.771059  |
| 6  | 0 | -0.617847 | 4.498056  | -0.240464 |
| 6  | 0 | 0.229544  | 4.567248  | 1.039908  |
| 1  | 0 | 0.114545  | 3.796789  | 3.085898  |
| 1  | 0 | -1.471619 | 4.150737  | 2.354460  |
| 1  | 0 | 2.236694  | 3.972121  | 1.674152  |

|    |   |           |           |           |
|----|---|-----------|-----------|-----------|
| 1  | 0 | 2.142016  | 4.501896  | -0.025558 |
| 1  | 0 | -0.139165 | 5.030646  | -1.068306 |
| 1  | 0 | -1.618794 | 4.911151  | -0.080982 |
| 1  | 0 | 0.339281  | 5.612941  | 1.348891  |
| 15 | 0 | -0.540256 | -1.486969 | 1.257865  |
| 8  | 0 | -1.795664 | -2.536685 | 1.248782  |
| 8  | 0 | 0.715511  | -2.497809 | 1.556509  |
| 8  | 0 | -0.717442 | -0.737743 | 2.688953  |
| 6  | 0 | -1.886161 | -3.419547 | 2.409105  |
| 6  | 0 | 0.596033  | -3.300331 | 2.772222  |
| 6  | 0 | -0.915035 | -1.607297 | 3.843683  |
| 6  | 0 | -0.780166 | -3.077587 | 3.419701  |
| 1  | 0 | -1.795754 | -4.447381 | 2.043773  |
| 1  | 0 | -2.881252 | -3.278319 | 2.841138  |
| 1  | 0 | 0.737227  | -4.344671 | 2.478147  |
| 1  | 0 | 1.409198  | -3.003347 | 3.441802  |
| 1  | 0 | -0.158387 | -1.328747 | 4.582792  |
| 1  | 0 | -1.909345 | -1.392042 | 4.246970  |
| 1  | 0 | -0.877893 | -3.723658 | 4.299506  |
| 45 | 0 | -0.231018 | -0.253860 | -0.561697 |
| 6  | 0 | 0.930239  | -2.797584 | -1.905575 |
| 1  | 0 | 0.729719  | -3.656911 | -2.560990 |
| 1  | 0 | 1.212119  | -3.196120 | -0.927033 |
| 6  | 0 | -0.302393 | -1.898084 | -1.871654 |
| 1  | 0 | -1.262414 | -2.406400 | -1.835211 |
| 6  | 0 | -0.128723 | -0.826673 | -2.915813 |
| 1  | 0 | -0.117605 | 0.237285  | -2.439617 |
| 1  | 0 | -0.974660 | -0.719818 | -3.597731 |
| 6  | 0 | 1.248478  | -1.058789 | -3.570954 |
| 1  | 0 | 1.766914  | -0.134927 | -3.842622 |
| 1  | 0 | 1.101980  | -1.636577 | -4.489999 |

Im3

|   |   |           |           |           |
|---|---|-----------|-----------|-----------|
| 5 | 0 | -2.298773 | 0.002843  | -0.461161 |
| 8 | 0 | -2.982597 | 0.226338  | -1.632656 |
| 8 | 0 | -3.127431 | -0.029398 | 0.633653  |
| 6 | 0 | -4.419949 | 0.128719  | -1.348241 |
| 6 | 0 | -4.467815 | 0.383983  | 0.209626  |
| 6 | 0 | -4.613508 | 1.862863  | 0.590263  |
| 1 | 0 | -3.873747 | 2.486317  | 0.080372  |
| 1 | 0 | -5.612179 | 2.241154  | 0.351608  |
| 1 | 0 | -4.456491 | 1.966364  | 1.667732  |
| 6 | 0 | -5.492497 | -0.453516 | 0.971730  |
| 1 | 0 | -6.510314 | -0.208602 | 0.649569  |
| 1 | 0 | -5.331107 | -1.523458 | 0.827703  |
| 1 | 0 | -5.416804 | -0.238251 | 2.041631  |
| 6 | 0 | -4.847340 | -1.286848 | -1.755435 |
| 1 | 0 | -5.923403 | -1.433401 | -1.621368 |
| 1 | 0 | -4.612193 | -1.437153 | -2.812932 |
| 1 | 0 | -4.315822 | -2.048909 | -1.178456 |
| 6 | 0 | -5.153288 | 1.162891  | -2.199241 |

|    |   |           |           |           |
|----|---|-----------|-----------|-----------|
| 1  | 0 | -5.034089 | 0.918255  | -3.258840 |
| 1  | 0 | -6.224952 | 1.159293  | -1.972991 |
| 1  | 0 | -4.770153 | 2.172389  | -2.037786 |
| 8  | 0 | 2.062797  | -0.342949 | -0.735328 |
| 6  | 0 | 2.668883  | -1.021285 | -1.587358 |
| 7  | 0 | 4.019876  | -1.160734 | -1.563109 |
| 1  | 0 | 4.406902  | -1.725403 | -2.307397 |
| 6  | 0 | 1.951725  | -1.736374 | -2.721780 |
| 1  | 0 | 2.661415  | -2.394894 | -3.233417 |
| 6  | 0 | 4.984931  | -0.651739 | -0.652596 |
| 6  | 0 | 6.325895  | -0.971129 | -0.921999 |
| 6  | 0 | 4.662749  | 0.123694  | 0.471302  |
| 6  | 0 | 7.340079  | -0.523931 | -0.078000 |
| 1  | 0 | 6.575657  | -1.571874 | -1.794026 |
| 6  | 0 | 5.693565  | 0.563718  | 1.307301  |
| 1  | 0 | 3.633657  | 0.375540  | 0.684909  |
| 6  | 0 | 7.028242  | 0.248135  | 1.045173  |
| 1  | 0 | 8.371723  | -0.779772 | -0.299373 |
| 1  | 0 | 5.441613  | 1.162043  | 2.178262  |
| 1  | 0 | 7.815996  | 0.597725  | 1.705102  |
| 15 | 0 | 0.006506  | 1.457181  | 1.419698  |
| 8  | 0 | -0.559187 | 1.165417  | 2.927595  |
| 8  | 0 | 1.572405  | 1.871068  | 1.745492  |
| 8  | 0 | -0.638366 | 2.947626  | 1.118818  |
| 6  | 0 | -0.358263 | 2.214630  | 3.915037  |
| 6  | 0 | 1.770531  | 2.885540  | 2.772988  |
| 6  | 0 | -0.401146 | 3.970528  | 2.128871  |
| 6  | 0 | 0.413772  | 3.386929  | 3.292970  |
| 1  | 0 | 0.192416  | 1.771367  | 4.750910  |
| 1  | 0 | -1.347232 | 2.526948  | 4.266047  |
| 1  | 0 | 2.360459  | 2.430397  | 3.575368  |
| 1  | 0 | 2.351272  | 3.696752  | 2.321773  |
| 1  | 0 | 0.131376  | 4.794657  | 1.642177  |
| 1  | 0 | -1.378966 | 4.328779  | 2.466287  |
| 1  | 0 | 0.576669  | 4.162735  | 4.049718  |
| 15 | 0 | -0.606357 | -1.948562 | 0.828723  |
| 8  | 0 | -1.639787 | -3.096545 | 0.292027  |
| 8  | 0 | 0.740706  | -2.837136 | 1.119150  |
| 8  | 0 | -1.139884 | -1.673979 | 2.335333  |
| 6  | 0 | -1.723306 | -4.301019 | 1.112212  |
| 6  | 0 | 0.570804  | -3.939510 | 2.061975  |
| 6  | 0 | -1.418746 | -2.857548 | 3.137165  |
| 6  | 0 | -0.917327 | -4.112878 | 2.406906  |
| 1  | 0 | -1.338998 | -5.133819 | 0.514377  |
| 1  | 0 | -2.784024 | -4.468144 | 1.320016  |
| 1  | 0 | 0.978413  | -4.832381 | 1.578682  |
| 1  | 0 | 1.167381  | -3.709235 | 2.950401  |
| 1  | 0 | -0.908373 | -2.714853 | 4.093970  |
| 1  | 0 | -2.499563 | -2.892295 | 3.308180  |
| 1  | 0 | -1.045673 | -4.991209 | 3.049495  |
| 45 | 0 | -0.257808 | -0.193034 | -0.456762 |

|   |   |           |           |           |
|---|---|-----------|-----------|-----------|
| 6 | 0 | 0.748742  | -2.538814 | -2.173657 |
| 1 | 0 | 0.502613  | -3.317732 | -2.911287 |
| 1 | 0 | 0.976174  | -3.048821 | -1.236150 |
| 6 | 0 | -0.410365 | -1.529742 | -2.128860 |
| 1 | 0 | -1.378002 | -2.025923 | -2.068104 |
| 6 | 0 | -0.230045 | -0.784776 | -3.460690 |
| 1 | 0 | -0.696723 | 0.198444  | -3.492216 |
| 1 | 0 | -0.718350 | -1.383235 | -4.243961 |
| 6 | 0 | 1.298183  | -0.730091 | -3.728376 |
| 1 | 0 | 1.694628  | 0.278653  | -3.594739 |
| 1 | 0 | 1.535461  | -1.027142 | -4.754037 |
| 8 | 0 | 0.059330  | 1.742870  | -1.738215 |
| 6 | 0 | 1.329113  | 2.471564  | -1.743079 |
| 6 | 0 | -1.016972 | 2.625636  | -2.179656 |
| 6 | 0 | 0.977121  | 3.916910  | -2.097404 |
| 1 | 0 | 1.805005  | 2.351560  | -0.769586 |
| 1 | 0 | 1.968992  | 2.014189  | -2.503242 |
| 6 | 0 | -0.313236 | 3.758484  | -2.917106 |
| 1 | 0 | -1.699339 | 2.032147  | -2.787217 |
| 1 | 0 | -1.544955 | 2.989259  | -1.292077 |
| 1 | 0 | 1.783032  | 4.407700  | -2.649924 |
| 1 | 0 | 0.780825  | 4.499634  | -1.191177 |
| 1 | 0 | -0.084868 | 3.466964  | -3.948477 |
| 1 | 0 | -0.918582 | 4.668725  | -2.947127 |

Im4

|    |   |           |           |           |
|----|---|-----------|-----------|-----------|
| 15 | 0 | 0.801107  | 2.419492  | 0.672352  |
| 8  | 0 | 0.131956  | 3.847749  | 0.238301  |
| 8  | 0 | 1.321658  | 2.755941  | 2.197803  |
| 8  | 0 | 2.217876  | 2.449560  | -0.152572 |
| 6  | 0 | 0.967466  | 5.029618  | 0.403334  |
| 6  | 0 | 2.148611  | 3.950781  | 2.335640  |
| 6  | 0 | 3.024336  | 3.654523  | 0.001898  |
| 6  | 0 | 2.337088  | 4.629191  | 0.969887  |
| 1  | 0 | 0.436175  | 5.710299  | 1.075860  |
| 1  | 0 | 1.062471  | 5.500996  | -0.579968 |
| 1  | 0 | 1.643779  | 4.613480  | 3.045484  |
| 1  | 0 | 3.107136  | 3.636247  | 2.760946  |
| 1  | 0 | 4.004891  | 3.342394  | 0.375253  |
| 1  | 0 | 3.145620  | 4.095217  | -0.992742 |
| 1  | 0 | 2.958792  | 5.523544  | 1.091627  |
| 15 | 0 | -1.331464 | 1.249568  | -1.375896 |
| 8  | 0 | -1.869385 | -0.004702 | -2.288285 |
| 8  | 0 | -2.666322 | 2.189355  | -1.294367 |
| 8  | 0 | -0.408409 | 2.060174  | -2.455397 |
| 6  | 0 | -2.530315 | 0.360731  | -3.536971 |
| 6  | 0 | -3.271463 | 2.553798  | -2.570317 |
| 6  | 0 | -1.050341 | 2.379333  | -3.725460 |
| 6  | 0 | -2.505925 | 1.885890  | -3.722844 |
| 1  | 0 | -3.555537 | -0.019618 | -3.487124 |
| 1  | 0 | -1.996395 | -0.150135 | -4.344237 |



|    |   |           |           |           |
|----|---|-----------|-----------|-----------|
| 1  | 0 | -4.314959 | 2.226299  | -2.536900 |
| 1  | 0 | -3.240627 | 3.645393  | -2.645404 |
| 1  | 0 | -0.995910 | 3.465243  | -3.850266 |
| 1  | 0 | -0.463900 | 1.898580  | -4.514785 |
| 1  | 0 | -2.980148 | 2.144197  | -4.676559 |
| 8  | 0 | 0.240315  | -0.142359 | 2.474452  |
| 6  | 0 | -0.526409 | 0.178379  | 3.678233  |
| 6  | 0 | 1.611492  | -0.478074 | 2.833440  |
| 6  | 0 | 0.383135  | -0.195655 | 4.861007  |
| 1  | 0 | -0.780331 | 1.241242  | 3.655194  |
| 1  | 0 | -1.442195 | -0.416135 | 3.628262  |
| 6  | 0 | 1.470794  | -1.083670 | 4.224526  |
| 1  | 0 | 1.994526  | -1.151384 | 2.064900  |
| 1  | 0 | 2.207606  | 0.441192  | 2.849396  |
| 1  | 0 | -0.169457 | -0.706823 | 5.653330  |
| 1  | 0 | 0.833608  | 0.703353  | 5.292966  |
| 1  | 0 | 1.136874  | -2.124477 | 4.155548  |
| 1  | 0 | 2.411319  | -1.063671 | 4.781698  |
| 45 | 0 | -0.466302 | 0.631787  | 0.559159  |
| 8  | 0 | -1.944365 | -0.960733 | 0.636422  |
| 6  | 0 | -2.118007 | -2.127201 | 0.220237  |
| 7  | 0 | -3.366764 | -2.634177 | 0.084046  |
| 6  | 0 | -0.987440 | -3.090689 | -0.090198 |
| 1  | 0 | -3.404988 | -3.595856 | -0.226992 |
| 6  | 0 | -4.640613 | -2.047114 | 0.317647  |
| 1  | 0 | -1.400031 | -3.958423 | -0.622638 |
| 6  | 0 | 0.171781  | -2.514331 | -0.924761 |
| 6  | 0 | -0.275139 | -3.585800 | 1.195590  |
| 6  | 0 | -5.754367 | -2.876216 | 0.105056  |
| 6  | 0 | -4.827400 | -0.720113 | 0.732459  |
| 1  | 0 | -0.089500 | -2.384421 | -1.978342 |
| 1  | 0 | 0.432964  | -1.521137 | -0.532232 |
| 6  | 0 | 1.333057  | -3.531036 | -0.713593 |
| 6  | 0 | 1.076393  | -4.155197 | 0.698105  |
| 1  | 0 | -0.115137 | -2.724565 | 1.852075  |
| 1  | 0 | -0.871361 | -4.318786 | 1.748828  |
| 6  | 0 | -7.044092 | -2.386719 | 0.300187  |
| 1  | 0 | -5.611113 | -3.906691 | -0.213249 |
| 6  | 0 | -6.128093 | -0.244583 | 0.924221  |
| 1  | 0 | -3.977099 | -0.076229 | 0.901285  |
| 1  | 0 | 1.228160  | -4.314909 | -1.474030 |
| 5  | 0 | 2.740267  | -2.850201 | -0.913616 |
| 1  | 0 | 1.876262  | -3.917748 | 1.405767  |
| 1  | 0 | 1.034243  | -5.246762 | 0.625892  |
| 6  | 0 | -7.238150 | -1.064584 | 0.711948  |
| 1  | 0 | -7.894754 | -3.040220 | 0.132885  |
| 1  | 0 | -6.266678 | 0.782926  | 1.247709  |
| 8  | 0 | 3.395819  | -2.151638 | 0.076045  |
| 8  | 0 | 3.420542  | -2.853389 | -2.103183 |
| 1  | 0 | -8.241744 | -0.681603 | 0.867798  |
| 6  | 0 | 4.730158  | -1.812115 | -0.424093 |

|   |   |          |           |           |
|---|---|----------|-----------|-----------|
| 6 | 0 | 4.539639 | -1.919912 | -1.990444 |
| 6 | 0 | 5.692836 | -2.858297 | 0.151802  |
| 6 | 0 | 5.096711 | -0.419818 | 0.086418  |
| 6 | 0 | 4.085073 | -0.608621 | -2.646551 |
| 6 | 0 | 5.730426 | -2.499918 | -2.750616 |
| 1 | 0 | 6.729206 | -2.646959 | -0.128401 |
| 1 | 0 | 5.624250 | -2.842263 | 1.243490  |
| 1 | 0 | 5.442090 | -3.867270 | -0.188074 |
| 1 | 0 | 5.201551 | -0.445719 | 1.175730  |
| 1 | 0 | 6.054394 | -0.094634 | -0.334249 |
| 1 | 0 | 4.331013 | 0.316237  | -0.167276 |
| 1 | 0 | 3.229211 | -0.167014 | -2.127880 |
| 1 | 0 | 4.894281 | 0.128161  | -2.667796 |
| 1 | 0 | 3.787841 | -0.818259 | -3.678122 |
| 1 | 0 | 6.611707 | -1.858667 | -2.641628 |
| 1 | 0 | 5.984001 | -3.503773 | -2.405289 |
| 1 | 0 | 5.487902 | -2.562028 | -3.815424 |

Im5

|   |   |           |           |           |
|---|---|-----------|-----------|-----------|
| 5 | 0 | 0.679248  | -0.712387 | 1.236237  |
| 8 | 0 | -0.252403 | -1.511251 | 1.836219  |
| 8 | 0 | 1.626061  | -0.218309 | 2.086538  |
| 6 | 0 | 0.205367  | -1.753205 | 3.216699  |
| 6 | 0 | 1.198740  | -0.545900 | 3.456425  |
| 6 | 0 | 0.520863  | 0.711586  | 4.012744  |
| 1 | 0 | -0.358486 | 0.990240  | 3.425536  |
| 1 | 0 | 0.218171  | 0.570661  | 5.054766  |
| 1 | 0 | 1.232567  | 1.541221  | 3.972304  |
| 6 | 0 | 2.441959  | -0.883222 | 4.274631  |
| 1 | 0 | 2.164725  | -1.194815 | 5.287306  |
| 1 | 0 | 3.029002  | -1.679385 | 3.813337  |
| 1 | 0 | 3.076011  | 0.004193  | 4.357708  |
| 6 | 0 | 0.891601  | -3.123778 | 3.216555  |
| 1 | 0 | 1.221231  | -3.402018 | 4.222062  |
| 1 | 0 | 0.179723  | -3.879360 | 2.872435  |
| 1 | 0 | 1.758696  | -3.143134 | 2.550092  |
| 6 | 0 | -1.020175 | -1.773999 | 4.125346  |
| 1 | 0 | -1.658361 | -2.622064 | 3.861192  |
| 1 | 0 | -0.720870 | -1.890870 | 5.172427  |
| 1 | 0 | -1.611526 | -0.861729 | 4.030453  |
| 8 | 0 | -1.641687 | -0.677514 | -0.829840 |
| 6 | 0 | -2.237073 | -1.463573 | -1.603284 |
| 7 | 0 | -3.584866 | -1.533480 | -1.629472 |
| 1 | 0 | -3.967103 | -2.178924 | -2.308766 |
| 6 | 0 | -1.499266 | -2.426166 | -2.519442 |
| 1 | 0 | -2.110103 | -2.622059 | -3.407700 |
| 6 | 0 | -4.564221 | -0.853903 | -0.850513 |
| 6 | 0 | -5.901283 | -1.031622 | -1.238947 |
| 6 | 0 | -4.255297 | -0.062404 | 0.264817  |
| 6 | 0 | -6.928072 | -0.424543 | -0.518736 |
| 1 | 0 | -6.139239 | -1.646047 | -2.104577 |

|    |   |           |           |           |
|----|---|-----------|-----------|-----------|
| 6  | 0 | -5.298063 | 0.538039  | 0.976513  |
| 1  | 0 | -3.228387 | 0.078617  | 0.569931  |
| 6  | 0 | -6.630565 | 0.365380  | 0.595763  |
| 1  | 0 | -7.958030 | -0.571259 | -0.828782 |
| 1  | 0 | -5.058146 | 1.141838  | 1.847038  |
| 1  | 0 | -7.428745 | 0.835877  | 1.161230  |
| 15 | 0 | -0.188466 | 2.011667  | -0.233377 |
| 8  | 0 | 0.867532  | 3.221219  | 0.082183  |
| 8  | 0 | -1.013267 | 2.625172  | -1.515030 |
| 8  | 0 | -1.280771 | 2.207133  | 0.980756  |
| 6  | 0 | 0.287439  | 4.548884  | 0.246238  |
| 6  | 0 | -1.569620 | 3.961721  | -1.339849 |
| 6  | 0 | -1.839878 | 3.547552  | 1.123131  |
| 6  | 0 | -1.238075 | 4.487741  | 0.066282  |
| 1  | 0 | 0.753516  | 5.199867  | -0.500010 |
| 1  | 0 | 0.559752  | 4.899850  | 1.246577  |
| 1  | 0 | -1.138864 | 4.598913  | -2.118559 |
| 1  | 0 | -2.650214 | 3.886029  | -1.496118 |
| 1  | 0 | -2.925104 | 3.460683  | 1.009550  |
| 1  | 0 | -1.610782 | 3.888364  | 2.137787  |
| 1  | 0 | -1.660637 | 5.491345  | 0.189668  |
| 15 | 0 | 2.704966  | -0.032438 | -0.838801 |
| 8  | 0 | 3.646114  | -1.248439 | -0.292367 |
| 8  | 0 | 3.192687  | 0.083071  | -2.398430 |
| 8  | 0 | 3.389330  | 1.279737  | -0.172306 |
| 6  | 0 | 5.079381  | -1.082776 | -0.518740 |
| 6  | 0 | 4.630423  | 0.265146  | -2.591454 |
| 6  | 0 | 4.830325  | 1.407475  | -0.362780 |
| 6  | 0 | 5.350163  | 0.251437  | -1.231947 |
| 1  | 0 | 5.411556  | -1.935627 | -1.118729 |
| 1  | 0 | 5.566265  | -1.121054 | 0.460203  |
| 1  | 0 | 4.972654  | -0.549554 | -3.236583 |
| 1  | 0 | 4.770264  | 1.217497  | -3.111816 |
| 1  | 0 | 5.003918  | 2.378777  | -0.835335 |
| 1  | 0 | 5.289483  | 1.403607  | 0.630464  |
| 1  | 0 | 6.428349  | 0.368390  | -1.389483 |
| 45 | 0 | 0.502106  | -0.290773 | -0.737770 |
| 1  | 0 | -0.096454 | -0.854903 | -3.204398 |
| 6  | 0 | 0.751070  | -2.188039 | -1.612850 |
| 1  | 0 | 1.792805  | -2.397800 | -1.852144 |
| 6  | 0 | 0.075744  | -3.384519 | -0.897253 |
| 1  | 0 | -0.219815 | -3.134054 | 0.123095  |
| 1  | 0 | 0.759624  | -4.237624 | -0.829315 |
| 6  | 0 | -1.171375 | -3.736442 | -1.746586 |
| 1  | 0 | -2.009337 | -4.102219 | -1.144698 |
| 1  | 0 | -0.938812 | -4.509558 | -2.487144 |
| 6  | 0 | -0.093872 | -1.907275 | -2.876502 |
| 1  | 0 | 0.290055  | -2.477345 | -3.732909 |

Im6

|   |   |           |          |           |
|---|---|-----------|----------|-----------|
| 5 | 0 | -3.513299 | 1.349063 | -0.352507 |
|---|---|-----------|----------|-----------|

|    |   |           |           |           |
|----|---|-----------|-----------|-----------|
| 8  | 0 | -4.654086 | 2.057151  | -0.092089 |
| 8  | 0 | -3.200585 | 0.436800  | 0.621411  |
| 6  | 0 | -5.304067 | 1.446521  | 1.071481  |
| 6  | 0 | -4.107256 | 0.666044  | 1.752888  |
| 6  | 0 | -3.326484 | 1.504218  | 2.772362  |
| 1  | 0 | -3.030886 | 2.471982  | 2.356607  |
| 1  | 0 | -3.916259 | 1.684006  | 3.676029  |
| 1  | 0 | -2.419259 | 0.963806  | 3.057134  |
| 6  | 0 | -4.473358 | -0.687074 | 2.357308  |
| 1  | 0 | -5.186204 | -0.562791 | 3.179335  |
| 1  | 0 | -4.912664 | -1.357265 | 1.615839  |
| 1  | 0 | -3.573060 | -1.162446 | 2.757678  |
| 6  | 0 | -6.405088 | 0.530254  | 0.522274  |
| 1  | 0 | -6.984469 | 0.071387  | 1.329070  |
| 1  | 0 | -7.086309 | 1.125305  | -0.092225 |
| 1  | 0 | -5.993214 | -0.266438 | -0.104760 |
| 6  | 0 | -5.919411 | 2.557810  | 1.918280  |
| 1  | 0 | -6.708752 | 3.056467  | 1.348653  |
| 1  | 0 | -6.368207 | 2.147144  | 2.829001  |
| 1  | 0 | -5.181522 | 3.310670  | 2.201576  |
| 8  | 0 | 1.364727  | 1.421386  | -0.487261 |
| 6  | 0 | 0.840004  | 2.294106  | -1.225381 |
| 7  | 0 | 1.230532  | 3.577525  | -1.157338 |
| 1  | 0 | 0.754494  | 4.207793  | -1.787656 |
| 6  | 0 | -0.209487 | 1.890410  | -2.260947 |
| 1  | 0 | 0.379694  | 1.394362  | -3.043635 |
| 6  | 0 | 2.208166  | 4.206084  | -0.331906 |
| 6  | 0 | 2.353095  | 5.592583  | -0.497320 |
| 6  | 0 | 2.997452  | 3.521052  | 0.602783  |
| 6  | 0 | 3.280324  | 6.296958  | 0.267338  |
| 1  | 0 | 1.740049  | 6.121371  | -1.224167 |
| 6  | 0 | 3.921068  | 4.244909  | 1.362760  |
| 1  | 0 | 2.893227  | 2.453405  | 0.732914  |
| 6  | 0 | 4.069820  | 5.624116  | 1.204703  |
| 1  | 0 | 3.383149  | 7.368879  | 0.130367  |
| 1  | 0 | 4.529315  | 3.715865  | 2.090483  |
| 1  | 0 | 4.791632  | 6.170139  | 1.803856  |
| 15 | 0 | 2.532471  | -1.373347 | 0.311938  |
| 8  | 0 | 2.506213  | -2.582209 | 1.406410  |
| 8  | 0 | 3.568453  | -1.942590 | -0.811710 |
| 8  | 0 | 3.441440  | -0.246329 | 1.069244  |
| 6  | 0 | 3.812436  | -3.007271 | 1.904459  |
| 6  | 0 | 4.852490  | -2.419837 | -0.303547 |
| 6  | 0 | 4.749597  | -0.708038 | 1.530306  |
| 6  | 0 | 4.926617  | -2.202646 | 1.216225  |
| 1  | 0 | 3.901773  | -4.077532 | 1.695930  |
| 1  | 0 | 3.810600  | -2.850809 | 2.987416  |
| 1  | 0 | 4.930744  | -3.479481 | -0.565294 |
| 1  | 0 | 5.632088  | -1.861553 | -0.830132 |
| 1  | 0 | 5.504697  | -0.099372 | 1.023614  |
| 1  | 0 | 4.793942  | -0.515863 | 2.606429  |

|    |   |           |           |           |
|----|---|-----------|-----------|-----------|
| 1  | 0 | 5.901438  | -2.538955 | 1.587431  |
| 15 | 0 | -0.307914 | -2.583871 | -0.465743 |
| 8  | 0 | -1.005753 | -3.140069 | 0.899874  |
| 8  | 0 | -1.558795 | -2.629103 | -1.525737 |
| 8  | 0 | 0.578569  | -3.869121 | -0.946406 |
| 6  | 0 | -1.681650 | -4.428772 | 0.786821  |
| 6  | 0 | -2.279473 | -3.897785 | -1.593950 |
| 6  | 0 | -0.151113 | -5.126936 | -1.073821 |
| 6  | 0 | -1.619157 | -4.929336 | -0.664860 |
| 1  | 0 | -2.713567 | -4.279093 | 1.117916  |
| 1  | 0 | -1.181975 | -5.119688 | 1.472928  |
| 1  | 0 | -3.315585 | -3.700292 | -1.302297 |
| 1  | 0 | -2.255774 | -4.223292 | -2.638267 |
| 1  | 0 | -0.061772 | -5.448614 | -2.116004 |
| 1  | 0 | 0.349625  | -5.855767 | -0.429401 |
| 1  | 0 | -2.151398 | -5.883956 | -0.745783 |
| 45 | 0 | 0.626981  | -0.580706 | -0.431506 |
| 6  | 0 | -1.240619 | 0.872701  | -1.660505 |
| 1  | 0 | -1.284518 | -0.042104 | -2.255179 |
| 1  | 0 | -1.014867 | 0.613774  | -0.596542 |
| 6  | 0 | -2.634188 | 1.585300  | -1.643315 |
| 1  | 0 | -3.207027 | 1.214133  | -2.505371 |
| 6  | 0 | -2.308765 | 3.075747  | -1.921886 |
| 1  | 0 | -2.039170 | 3.598661  | -0.994371 |
| 1  | 0 | -3.158931 | 3.608853  | -2.354962 |
| 6  | 0 | -1.097834 | 3.004753  | -2.862227 |
| 1  | 0 | -0.596989 | 3.966992  | -3.020343 |
| 1  | 0 | -1.424006 | 2.679785  | -3.856892 |

Im7

|   |   |           |           |           |
|---|---|-----------|-----------|-----------|
| 5 | 0 | -2.661705 | -2.521923 | 0.105246  |
| 8 | 0 | -3.778701 | -1.859038 | -0.333074 |
| 8 | 0 | -2.708631 | -2.852374 | 1.432653  |
| 6 | 0 | -4.779437 | -1.929236 | 0.737153  |
| 6 | 0 | -3.889137 | -2.207910 | 2.014207  |
| 6 | 0 | -3.391814 | -0.934360 | 2.710557  |
| 1 | 0 | -2.934109 | -0.235447 | 2.004834  |
| 1 | 0 | -4.207078 | -0.420753 | 3.229723  |
| 1 | 0 | -2.637717 | -1.212337 | 3.452522  |
| 6 | 0 | -4.503624 | -3.160918 | 3.036529  |
| 1 | 0 | -5.424278 | -2.740146 | 3.454964  |
| 1 | 0 | -4.732597 | -4.134684 | 2.600009  |
| 1 | 0 | -3.799895 | -3.316583 | 3.859351  |
| 6 | 0 | -5.721263 | -3.084925 | 0.376553  |
| 1 | 0 | -6.542470 | -3.172398 | 1.094282  |
| 1 | 0 | -6.149534 | -2.898225 | -0.612414 |
| 1 | 0 | -5.191881 | -4.041547 | 0.340786  |
| 6 | 0 | -5.549400 | -0.611359 | 0.764052  |
| 1 | 0 | -6.114479 | -0.499075 | -0.166305 |
| 1 | 0 | -6.262348 | -0.596525 | 1.595134  |
| 1 | 0 | -4.875815 | 0.241727  | 0.865375  |

|    |   |           |           |           |
|----|---|-----------|-----------|-----------|
| 8  | 0 | 1.992659  | -0.975724 | -0.654826 |
| 6  | 0 | 2.138265  | -2.201354 | -0.876868 |
| 7  | 0 | 3.357932  | -2.775687 | -0.811171 |
| 1  | 0 | 3.373401  | -3.773669 | -0.975022 |
| 6  | 0 | 0.979604  | -3.097850 | -1.257865 |
| 1  | 0 | 1.362931  | -4.099884 | -1.474137 |
| 6  | 0 | 4.631197  | -2.205237 | -0.520607 |
| 6  | 0 | 5.660793  | -3.103235 | -0.201261 |
| 6  | 0 | 4.892552  | -0.829685 | -0.586153 |
| 6  | 0 | 6.947499  | -2.632291 | 0.054020  |
| 1  | 0 | 5.455618  | -4.170194 | -0.150935 |
| 6  | 0 | 6.188864  | -0.374074 | -0.330250 |
| 1  | 0 | 4.105169  | -0.132689 | -0.835309 |
| 6  | 0 | 7.217912  | -1.262238 | -0.009035 |
| 1  | 0 | 7.736051  | -3.336756 | 0.299620  |
| 1  | 0 | 6.393788  | 0.690533  | -0.397142 |
| 1  | 0 | 8.220584  | -0.893655 | 0.183379  |
| 15 | 0 | -1.296574 | 1.839960  | -0.995277 |
| 8  | 0 | -2.463060 | 2.060051  | 0.127257  |
| 8  | 0 | -0.832964 | 3.371694  | -1.314858 |
| 8  | 0 | -2.175499 | 1.471140  | -2.324927 |
| 6  | 0 | -3.491486 | 3.038092  | -0.219285 |
| 6  | 0 | -1.901557 | 4.287632  | -1.702454 |
| 6  | 0 | -3.264312 | 2.394507  | -2.636382 |
| 6  | 0 | -3.257796 | 3.567495  | -1.642800 |
| 1  | 0 | -3.441031 | 3.840983  | 0.522767  |
| 1  | 0 | -4.456456 | 2.530089  | -0.133515 |
| 1  | 0 | -1.864862 | 5.133784  | -1.009816 |
| 1  | 0 | -1.675321 | 4.641331  | -2.713029 |
| 1  | 0 | -3.107946 | 2.735801  | -3.663815 |
| 1  | 0 | -4.197597 | 1.825876  | -2.583541 |
| 1  | 0 | -4.056162 | 4.270684  | -1.905920 |
| 15 | 0 | 1.378945  | 1.622115  | 0.750472  |
| 8  | 0 | 0.589877  | 2.826526  | 1.514669  |
| 8  | 0 | 1.985726  | 0.766044  | 1.998811  |
| 8  | 0 | 2.706351  | 2.383344  | 0.180586  |
| 6  | 0 | 1.368164  | 3.541422  | 2.524736  |
| 6  | 0 | 2.808296  | 1.525260  | 2.938880  |
| 6  | 0 | 3.443390  | 3.179136  | 1.160988  |
| 6  | 0 | 2.811598  | 3.012987  | 2.551772  |
| 1  | 0 | 0.865257  | 3.392650  | 3.485126  |
| 1  | 0 | 1.332916  | 4.602097  | 2.259696  |
| 1  | 0 | 2.379670  | 1.367350  | 3.932751  |
| 1  | 0 | 3.815248  | 1.097848  | 2.909657  |
| 1  | 0 | 4.478528  | 2.826186  | 1.145200  |
| 1  | 0 | 3.412982  | 4.219631  | 0.823535  |
| 1  | 0 | 3.392612  | 3.580557  | 3.287594  |
| 45 | 0 | 0.301577  | 0.348786  | -0.679618 |
| 6  | 0 | -0.104361 | -3.167022 | -0.128820 |
| 1  | 0 | -0.069723 | -4.118428 | 0.407454  |
| 1  | 0 | 0.072057  | -2.377650 | 0.611006  |

|   |   |           |           |           |
|---|---|-----------|-----------|-----------|
| 6 | 0 | -1.458244 | -2.926556 | -0.834892 |
| 1 | 0 | -1.762580 | -3.869757 | -1.321216 |
| 6 | 0 | -1.085384 | -1.969492 | -1.979228 |
| 1 | 0 | -0.968788 | -0.929128 | -1.572058 |
| 1 | 0 | -1.857050 | -1.849633 | -2.743700 |
| 6 | 0 | 0.236166  | -2.535432 | -2.516213 |
| 1 | 0 | 0.831799  | -1.812314 | -3.080756 |
| 1 | 0 | 0.012599  | -3.366193 | -3.193594 |

Im8

|    |   |           |           |           |
|----|---|-----------|-----------|-----------|
| 45 | 0 | -0.040350 | -0.714661 | -0.703299 |
| 8  | 0 | 0.375991  | 1.504217  | -0.391742 |
| 6  | 0 | 0.419341  | 2.358070  | -1.297066 |
| 7  | 0 | 0.640691  | 3.669597  | -1.041402 |
| 1  | 0 | 0.645693  | 4.276096  | -1.850410 |
| 6  | 0 | 0.235995  | 1.983078  | -2.762043 |
| 1  | 0 | 0.349282  | 2.872846  | -3.387551 |
| 6  | 0 | -1.149383 | 1.312245  | -2.993503 |
| 1  | 0 | -1.931274 | 1.683969  | -2.329476 |
| 1  | 0 | -1.472382 | 1.494425  | -4.028043 |
| 6  | 0 | 1.252489  | 0.878385  | -3.172911 |
| 1  | 0 | 2.203964  | 0.946857  | -2.640848 |
| 1  | 0 | 1.471125  | 0.963876  | -4.246597 |
| 6  | 0 | 0.492913  | -0.418488 | -2.946879 |
| 6  | 0 | -0.866520 | -0.173011 | -2.846779 |
| 1  | 0 | -1.616947 | -0.923144 | -3.068185 |
| 1  | 0 | 0.909423  | -1.378597 | -3.230243 |
| 6  | 0 | 0.858741  | 4.340269  | 0.194129  |
| 6  | 0 | 0.980351  | 5.737538  | 0.132119  |
| 6  | 0 | 0.965503  | 3.680571  | 1.426986  |
| 6  | 0 | 1.207174  | 6.475239  | 1.292035  |
| 1  | 0 | 0.896353  | 6.248649  | -0.824654 |
| 6  | 0 | 1.193869  | 4.436457  | 2.580489  |
| 1  | 0 | 0.875056  | 2.605083  | 1.478870  |
| 6  | 0 | 1.314905  | 5.826389  | 2.525761  |
| 1  | 0 | 1.298309  | 7.555232  | 1.229721  |
| 1  | 0 | 1.278846  | 3.924160  | 3.534435  |
| 1  | 0 | 1.491583  | 6.398516  | 3.431078  |
| 15 | 0 | -0.263408 | -1.202458 | 1.508055  |
| 8  | 0 | 0.004870  | -2.762569 | 1.885549  |
| 8  | 0 | 0.810022  | -0.408380 | 2.450908  |
| 8  | 0 | -1.662343 | -0.904732 | 2.298283  |
| 6  | 0 | 0.014641  | -3.076741 | 3.309655  |
| 6  | 0 | 0.776650  | -0.749704 | 3.869282  |
| 6  | 0 | -1.673058 | -1.264622 | 3.714911  |
| 6  | 0 | -0.299684 | -1.815287 | 4.129609  |
| 1  | 0 | 1.006757  | -3.473251 | 3.546200  |
| 1  | 0 | -0.733053 | -3.859091 | 3.469865  |
| 1  | 0 | 1.774223  | -1.111920 | 4.135873  |
| 1  | 0 | 0.570242  | 0.172839  | 4.420678  |
| 1  | 0 | -1.931110 | -0.359371 | 4.272499  |

|    |   |           |           |           |
|----|---|-----------|-----------|-----------|
| 1  | 0 | -2.462297 | -2.009997 | 3.852809  |
| 1  | 0 | -0.314706 | -2.066471 | 5.196180  |
| 15 | 0 | 2.363099  | -1.330455 | -0.648994 |
| 8  | 0 | 2.798513  | -2.367962 | -1.849374 |
| 8  | 0 | 3.490080  | -0.145098 | -0.841672 |
| 8  | 0 | 2.937965  | -2.109586 | 0.673968  |
| 6  | 0 | 4.199078  | -2.774374 | -1.873640 |
| 6  | 0 | 4.883303  | -0.581100 | -0.853234 |
| 6  | 0 | 4.330651  | -2.536242 | 0.618338  |
| 6  | 0 | 4.960550  | -2.109956 | -0.715993 |
| 1  | 0 | 4.607079  | -2.478797 | -2.845454 |
| 1  | 0 | 4.221174  | -3.865597 | -1.794686 |
| 1  | 0 | 5.321703  | -0.240656 | -1.796667 |
| 1  | 0 | 5.388298  | -0.077233 | -0.023177 |
| 1  | 0 | 4.843965  | -2.076057 | 1.468515  |
| 1  | 0 | 4.342364  | -3.624239 | 0.737753  |
| 1  | 0 | 6.009792  | -2.425133 | -0.741425 |
| 5  | 0 | -2.149101 | -0.594788 | -0.630599 |
| 8  | 0 | -2.843480 | 0.576567  | -0.479710 |
| 8  | 0 | -2.962178 | -1.690107 | -0.747993 |
| 6  | 0 | -4.271105 | 0.260249  | -0.322035 |
| 6  | 0 | -4.352377 | -1.234426 | -0.849588 |
| 6  | 0 | -5.071700 | 1.277752  | -1.134486 |
| 6  | 0 | -4.600796 | 0.416935  | 1.165836  |
| 6  | 0 | -5.218855 | -2.172051 | -0.010352 |
| 6  | 0 | -4.744711 | -1.355976 | -2.327658 |
| 1  | 0 | -6.143599 | 1.061267  | -1.076728 |
| 1  | 0 | -4.909749 | 2.278828  | -0.724086 |
| 1  | 0 | -4.780274 | 1.290289  | -2.186733 |
| 1  | 0 | -4.370308 | 1.441117  | 1.473373  |
| 1  | 0 | -5.662705 | 0.232852  | 1.355127  |
| 1  | 0 | -4.005570 | -0.260982 | 1.779018  |
| 1  | 0 | -4.882158 | -2.215865 | 1.026874  |
| 1  | 0 | -6.266173 | -1.852236 | -0.025307 |
| 1  | 0 | -5.168156 | -3.182556 | -0.425837 |
| 1  | 0 | -5.792899 | -1.086216 | -2.487820 |
| 1  | 0 | -4.128495 | -0.719828 | -2.969689 |
| 1  | 0 | -4.606542 | -2.393092 | -2.646111 |
| 1  | 0 | -0.369127 | -2.192353 | -0.957405 |

Im9

|    |   |           |           |           |
|----|---|-----------|-----------|-----------|
| 45 | 0 | 0.220460  | -0.848890 | -0.426050 |
| 8  | 0 | -0.261418 | 1.330959  | -0.806967 |
| 6  | 0 | -0.496200 | 1.895253  | -1.894499 |
| 7  | 0 | -0.694646 | 3.233682  | -1.973355 |
| 1  | 0 | -0.856083 | 3.591578  | -2.905402 |
| 6  | 0 | -0.625385 | 1.130117  | -3.202027 |
| 1  | 0 | -0.570419 | 1.836894  | -4.037086 |
| 6  | 0 | -1.966927 | 0.334772  | -3.245288 |
| 1  | 0 | -2.739351 | 0.817625  | -2.636755 |
| 1  | 0 | -2.344265 | 0.323483  | -4.271519 |



|    |   |           |           |           |
|----|---|-----------|-----------|-----------|
| 6  | 0 | 0.444291  | 0.029560  | -3.326695 |
| 1  | 0 | 1.442028  | 0.376250  | -3.047577 |
| 1  | 0 | 0.495227  | -0.268996 | -4.384330 |
| 6  | 0 | -0.099438 | -1.148780 | -2.503085 |
| 1  | 0 | 0.359419  | -2.096223 | -2.783774 |
| 6  | 0 | -0.712818 | 4.225834  | -0.953986 |
| 6  | 0 | -0.805038 | 5.559545  | -1.383054 |
| 6  | 0 | -0.664767 | 3.931829  | 0.416353  |
| 6  | 0 | -0.850655 | 6.596082  | -0.453139 |
| 1  | 0 | -0.841669 | 5.786757  | -2.446352 |
| 6  | 0 | -0.712531 | 4.984499  | 1.335051  |
| 1  | 0 | -0.593890 | 2.908229  | 0.755489  |
| 6  | 0 | -0.804517 | 6.312863  | 0.915167  |
| 1  | 0 | -0.922774 | 7.622515  | -0.799301 |
| 1  | 0 | -0.681350 | 4.755430  | 2.396391  |
| 1  | 0 | -0.841792 | 7.118011  | 1.642201  |
| 15 | 0 | 0.522485  | -0.330122 | 1.997010  |
| 8  | 0 | 0.215307  | -1.525229 | 3.086185  |
| 8  | 0 | 2.019035  | 0.158016  | 2.464171  |
| 8  | 0 | -0.402549 | 0.891206  | 2.603968  |
| 6  | 0 | 0.430670  | -1.191528 | 4.489437  |
| 6  | 0 | 2.179820  | 0.498684  | 3.870916  |
| 6  | 0 | -0.226192 | 1.187011  | 4.020313  |
| 6  | 0 | 0.857850  | 0.278805  | 4.622010  |
| 1  | 0 | 1.199943  | -1.869789 | 4.871905  |
| 1  | 0 | -0.508930 | -1.385345 | 5.016663  |
| 1  | 0 | 2.976377  | -0.137675 | 4.269702  |
| 1  | 0 | 2.499662  | 1.544580  | 3.920006  |
| 1  | 0 | 0.050782  | 2.243052  | 4.099013  |
| 1  | 0 | -1.193832 | 1.036253  | 4.510362  |
| 1  | 0 | 0.993523  | 0.524873  | 5.681220  |
| 15 | 0 | 2.382251  | -1.020221 | -0.788200 |
| 8  | 0 | 2.845738  | -1.843965 | -2.119777 |
| 8  | 0 | 3.203996  | 0.378707  | -0.960166 |
| 8  | 0 | 3.214338  | -1.790769 | 0.378827  |
| 6  | 0 | 4.289926  | -1.975827 | -2.301444 |
| 6  | 0 | 4.642596  | 0.243729  | -1.180802 |
| 6  | 0 | 4.658370  | -1.865220 | 0.178646  |
| 6  | 0 | 5.035035  | -1.241733 | -1.174698 |
| 1  | 0 | 4.528157  | -1.555089 | -3.282869 |
| 1  | 0 | 4.517517  | -3.045921 | -2.304919 |
| 1  | 0 | 4.869161  | 0.718046  | -2.140603 |
| 1  | 0 | 5.141452  | 0.797402  | -0.380028 |
| 1  | 0 | 5.128788  | -1.333731 | 1.011587  |
| 1  | 0 | 4.931136  | -2.923468 | 0.225908  |
| 1  | 0 | 6.115629  | -1.334788 | -1.331652 |
| 5  | 0 | -2.494877 | -1.548729 | -1.551818 |
| 8  | 0 | -3.699095 | -2.171453 | -1.572732 |
| 8  | 0 | -2.061029 | -1.248494 | -0.260138 |
| 6  | 0 | -4.259912 | -2.139537 | -0.220737 |
| 6  | 0 | -2.977253 | -1.954732 | 0.685566  |

|   |   |           |           |           |
|---|---|-----------|-----------|-----------|
| 6 | 0 | -5.021470 | -3.441489 | 0.012933  |
| 6 | 0 | -5.221239 | -0.945204 | -0.177426 |
| 6 | 0 | -3.205862 | -1.083668 | 1.913895  |
| 6 | 0 | -2.299790 | -3.271838 | 1.067237  |
| 1 | 0 | -5.401431 | -3.489528 | 1.038776  |
| 1 | 0 | -5.877086 | -3.487294 | -0.666371 |
| 1 | 0 | -4.397010 | -4.317259 | -0.171487 |
| 1 | 0 | -5.963241 | -1.063622 | -0.971621 |
| 1 | 0 | -5.750064 | -0.890441 | 0.778303  |
| 1 | 0 | -4.699487 | 0.003045  | -0.337805 |
| 1 | 0 | -3.493335 | -0.065931 | 1.645880  |
| 1 | 0 | -3.999051 | -1.520510 | 2.530132  |
| 1 | 0 | -2.300176 | -1.038632 | 2.519583  |
| 1 | 0 | -2.918565 | -3.829515 | 1.776193  |
| 1 | 0 | -2.122597 | -3.905208 | 0.193556  |
| 1 | 0 | -1.341100 | -3.064903 | 1.548455  |
| 1 | 0 | 0.419363  | -2.361706 | -0.212851 |
| 6 | 0 | -1.625119 | -1.127996 | -2.778048 |
| 1 | 0 | -1.840756 | -1.813401 | -3.608916 |

Im10

|    |   |           |           |           |
|----|---|-----------|-----------|-----------|
| 45 | 0 | 0.846203  | -0.181943 | 0.568149  |
| 8  | 0 | -1.224584 | -0.694601 | 0.881191  |
| 6  | 0 | -2.031142 | -0.438729 | 1.805971  |
| 7  | 0 | -3.246368 | -1.027563 | 1.849001  |
| 1  | 0 | -3.821113 | -0.758476 | 2.637451  |
| 6  | 0 | -1.775823 | 0.566451  | 2.926431  |
| 1  | 0 | -2.202627 | 0.146274  | 3.844580  |
| 6  | 0 | -2.428209 | 1.947913  | 2.606059  |
| 1  | 0 | -3.348674 | 1.857493  | 2.022745  |
| 1  | 0 | -2.693474 | 2.422812  | 3.555818  |
| 6  | 0 | -0.293504 | 0.924114  | 3.127796  |
| 1  | 0 | 0.377785  | 0.058488  | 3.088220  |
| 1  | 0 | -0.188593 | 1.359070  | 4.128197  |
| 6  | 0 | 0.008824  | 2.020064  | 2.082883  |
| 1  | 0 | 0.830552  | 2.668810  | 2.389913  |
| 6  | 0 | -3.886049 | -1.928329 | 0.951983  |
| 6  | 0 | -5.148992 | -2.399199 | 1.345581  |
| 6  | 0 | -3.333628 | -2.336473 | -0.270074 |
| 6  | 0 | -5.861997 | -3.269423 | 0.524068  |
| 1  | 0 | -5.575498 | -2.083588 | 2.295325  |
| 6  | 0 | -4.065099 | -3.207568 | -1.083393 |
| 1  | 0 | -2.358188 | -1.988392 | -0.577361 |
| 6  | 0 | -5.322681 | -3.677637 | -0.699477 |
| 1  | 0 | -6.837846 | -3.624573 | 0.840317  |
| 1  | 0 | -3.642132 | -3.513589 | -2.036036 |
| 1  | 0 | -5.877731 | -4.351577 | -1.344362 |
| 15 | 0 | 1.209795  | -2.097169 | -0.439970 |
| 8  | 0 | -0.027677 | -2.559064 | -1.404262 |
| 8  | 0 | 2.489507  | -2.260157 | -1.436879 |
| 8  | 0 | 1.370379  | -3.388158 | 0.544973  |

|    |   |           |           |           |
|----|---|-----------|-----------|-----------|
| 6  | 0 | 0.141725  | -3.852713 | -2.063599 |
| 6  | 0 | 2.637195  | -3.573071 | -2.060693 |
| 6  | 0 | 1.495648  | -4.683282 | -0.120294 |
| 6  | 0 | 1.476187  | -4.490483 | -1.644442 |
| 1  | 0 | 0.103127  | -3.671836 | -3.142157 |
| 1  | 0 | -0.709072 | -4.475399 | -1.771035 |
| 1  | 0 | 2.655662  | -3.410691 | -3.142352 |
| 1  | 0 | 3.602641  | -3.976486 | -1.740383 |
| 1  | 0 | 2.435665  | -5.127949 | 0.219452  |
| 1  | 0 | 0.660959  | -5.303720 | 0.219621  |
| 1  | 0 | 1.585513  | -5.462796 | -2.138209 |
| 15 | 0 | 2.944738  | 0.456870  | 0.334234  |
| 8  | 0 | 3.271582  | 1.760482  | 1.271980  |
| 8  | 0 | 4.125902  | -0.576087 | 0.785200  |
| 8  | 0 | 3.458907  | 0.959283  | -1.129050 |
| 6  | 0 | 4.634383  | 2.278981  | 1.172063  |
| 6  | 0 | 5.484107  | -0.043893 | 0.732156  |
| 6  | 0 | 4.837208  | 1.438339  | -1.185813 |
| 6  | 0 | 5.463034  | 1.404044  | 0.217402  |
| 1  | 0 | 5.051610  | 2.277730  | 2.183442  |
| 1  | 0 | 4.563858  | 3.310408  | 0.813361  |
| 1  | 0 | 5.895279  | -0.106942 | 1.744284  |
| 1  | 0 | 6.060135  | -0.697008 | 0.069697  |
| 1  | 0 | 5.377414  | 0.791438  | -1.883918 |
| 1  | 0 | 4.805723  | 2.454558  | -1.589698 |
| 1  | 0 | 6.487996  | 1.789185  | 0.169965  |
| 5  | 0 | -1.661425 | 3.082463  | 0.341962  |
| 8  | 0 | -2.929356 | 3.113027  | -0.172215 |
| 8  | 0 | -0.688455 | 3.352156  | -0.583313 |
| 6  | 0 | -2.817768 | 3.241406  | -1.629793 |
| 6  | 0 | -1.353653 | 3.816106  | -1.805692 |
| 6  | 0 | -3.937151 | 4.156297  | -2.120018 |
| 6  | 0 | -2.997493 | 1.830619  | -2.203975 |
| 6  | 0 | -0.583897 | 3.272663  | -3.007017 |
| 6  | 0 | -1.287363 | 5.348112  | -1.782552 |
| 1  | 0 | -3.856323 | 4.322231  | -3.199568 |
| 1  | 0 | -4.905504 | 3.687291  | -1.922857 |
| 1  | 0 | -3.922924 | 5.124568  | -1.616450 |
| 1  | 0 | -3.967935 | 1.439235  | -1.885657 |
| 1  | 0 | -2.975558 | 1.840165  | -3.297893 |
| 1  | 0 | -2.221814 | 1.146477  | -1.847561 |
| 1  | 0 | -0.479998 | 2.186810  | -2.965691 |
| 1  | 0 | -1.085670 | 3.542752  | -3.942262 |
| 1  | 0 | 0.419532  | 3.707917  | -3.025017 |
| 1  | 0 | -1.715951 | 5.780016  | -2.691755 |
| 1  | 0 | -1.817153 | 5.763750  | -0.920385 |
| 1  | 0 | -0.240063 | 5.656693  | -1.718033 |
| 1  | 0 | 0.348537  | 1.648867  | 1.078360  |
| 6  | 0 | -1.337323 | 2.777148  | 1.860379  |
| 1  | 0 | -1.252434 | 3.758740  | 2.347762  |

Im11

|    |   |           |           |           |
|----|---|-----------|-----------|-----------|
| 5  | 0 | 0.530195  | -0.343069 | 1.089618  |
| 8  | 0 | -0.722732 | -0.639482 | 1.527440  |
| 8  | 0 | 1.464909  | -0.201649 | 2.068471  |
| 6  | 0 | -0.622671 | -0.907143 | 2.980271  |
| 6  | 0 | 0.747176  | -0.207437 | 3.358588  |
| 6  | 0 | 0.597863  | 1.257797  | 3.780015  |
| 1  | 0 | 0.022980  | 1.832527  | 3.049811  |
| 1  | 0 | 0.110946  | 1.338540  | 4.756423  |
| 1  | 0 | 1.593318  | 1.704597  | 3.856694  |
| 6  | 0 | 1.602656  | -0.965218 | 4.369647  |
| 1  | 0 | 1.084141  | -1.042535 | 5.331145  |
| 1  | 0 | 1.849255  | -1.971015 | 4.024803  |
| 1  | 0 | 2.537513  | -0.422146 | 4.534926  |
| 6  | 0 | -0.601283 | -2.430645 | 3.139490  |
| 1  | 0 | -0.569637 | -2.715913 | 4.195123  |
| 1  | 0 | -1.513344 | -2.849602 | 2.705436  |
| 1  | 0 | 0.257898  | -2.880350 | 2.633509  |
| 6  | 0 | -1.858883 | -0.316835 | 3.650619  |
| 1  | 0 | -2.752555 | -0.844079 | 3.305540  |
| 1  | 0 | -1.797211 | -0.433675 | 4.737908  |
| 1  | 0 | -1.980799 | 0.742012  | 3.417389  |
| 8  | 0 | -3.172008 | 0.630635  | -0.974191 |
| 6  | 0 | -3.454891 | -0.522044 | -1.292979 |
| 7  | 0 | -4.704507 | -1.068609 | -1.194755 |
| 1  | 0 | -4.794657 | -2.026041 | -1.508098 |
| 6  | 0 | -2.389729 | -1.489944 | -1.827092 |
| 1  | 0 | -2.770009 | -1.980099 | -2.734058 |
| 6  | 0 | -5.906622 | -0.496490 | -0.703301 |
| 6  | 0 | -7.049227 | -1.313234 | -0.716003 |
| 6  | 0 | -5.994011 | 0.817055  | -0.218410 |
| 6  | 0 | -8.268240 | -0.826086 | -0.248361 |
| 1  | 0 | -6.983966 | -2.331779 | -1.093427 |
| 6  | 0 | -7.224444 | 1.290214  | 0.247040  |
| 1  | 0 | -5.116538 | 1.448014  | -0.211758 |
| 6  | 0 | -8.362861 | 0.481510  | 0.237656  |
| 1  | 0 | -9.142682 | -1.469634 | -0.265574 |
| 1  | 0 | -7.286830 | 2.308729  | 0.619346  |
| 1  | 0 | -9.311654 | 0.863387  | 0.601283  |
| 6  | 0 | 0.045083  | -1.729440 | -1.941007 |
| 1  | 0 | 0.739316  | -1.913869 | -2.764089 |
| 45 | 0 | 0.858245  | -0.097708 | -0.904604 |
| 1  | 0 | -1.048470 | 0.162972  | -1.512885 |
| 6  | 0 | -1.082703 | -0.767283 | -2.209872 |
| 1  | 0 | -1.088789 | -0.315953 | -3.205204 |
| 15 | 0 | 1.264621  | 2.208292  | -0.458271 |
| 8  | 0 | 0.922654  | 3.038111  | -1.830466 |
| 8  | 0 | 0.382653  | 3.019011  | 0.655555  |
| 8  | 0 | 2.779895  | 2.721457  | -0.129464 |
| 6  | 0 | 1.136862  | 4.482426  | -1.770390 |
| 6  | 0 | 0.570133  | 4.468340  | 0.678091  |

|    |   |           |           |           |
|----|---|-----------|-----------|-----------|
| 6  | 0 | 2.952221  | 4.170635  | -0.060950 |
| 6  | 0 | 1.621698  | 4.879000  | -0.366063 |
| 1  | 0 | 0.183477  | 4.958209  | -2.018004 |
| 1  | 0 | 1.874927  | 4.734073  | -2.538033 |
| 1  | 0 | -0.403605 | 4.922166  | 0.471118  |
| 1  | 0 | 0.884370  | 4.736286  | 1.691313  |
| 1  | 0 | 3.312030  | 4.406120  | 0.945325  |
| 1  | 0 | 3.724839  | 4.435705  | -0.788848 |
| 1  | 0 | 1.769592  | 5.964048  | -0.325102 |
| 15 | 0 | 2.817219  | -1.126872 | -0.640212 |
| 8  | 0 | 2.816393  | -2.582065 | 0.100950  |
| 8  | 0 | 3.470743  | -1.495899 | -2.094082 |
| 8  | 0 | 4.034109  | -0.346158 | 0.095620  |
| 6  | 0 | 4.102841  | -3.280052 | 0.102278  |
| 6  | 0 | 4.781014  | -2.147083 | -2.039294 |
| 6  | 0 | 5.297547  | -1.076026 | 0.172545  |
| 6  | 0 | 5.175151  | -2.412098 | -0.576420 |
| 1  | 0 | 3.955211  | -4.227279 | -0.425108 |
| 1  | 0 | 4.354104  | -3.484524 | 1.146954  |
| 1  | 0 | 4.695683  | -3.076163 | -2.610022 |
| 1  | 0 | 5.495580  | -1.483900 | -2.535721 |
| 1  | 0 | 6.062240  | -0.431502 | -0.270048 |
| 1  | 0 | 5.521606  | -1.224981 | 1.233085  |
| 1  | 0 | 6.137115  | -2.936272 | -0.548677 |
| 6  | 0 | -1.941953 | -2.573027 | -0.808149 |
| 1  | 0 | -2.631772 | -3.421435 | -0.769207 |
| 1  | 0 | -1.890878 | -2.126630 | 0.186818  |
| 6  | 0 | -0.532125 | -2.983488 | -1.281733 |
| 1  | 0 | 0.094631  | -3.373490 | -0.475108 |
| 1  | 0 | -0.601951 | -3.775469 | -2.041333 |

### Im12

|   |   |           |           |          |
|---|---|-----------|-----------|----------|
| 5 | 0 | 0.036612  | -0.181715 | 0.959665 |
| 8 | 0 | -0.946932 | -1.083385 | 1.240493 |
| 8 | 0 | 0.498032  | 0.506669  | 2.041663 |
| 6 | 0 | -1.054601 | -1.161866 | 2.714424 |
| 6 | 0 | -0.409762 | 0.209327  | 3.165043 |
| 6 | 0 | -1.410995 | 1.367286  | 3.233910 |
| 1 | 0 | -1.996704 | 1.453350  | 2.314807 |
| 1 | 0 | -2.097985 | 1.247628  | 4.076880 |
| 1 | 0 | -0.861188 | 2.302109  | 3.372470 |
| 6 | 0 | 0.421435  | 0.142714  | 4.442222 |
| 1 | 0 | -0.205142 | -0.139787 | 5.294894 |
| 1 | 0 | 1.240167  | -0.574047 | 4.357536 |
| 1 | 0 | 0.850774  | 1.126522  | 4.651566 |
| 6 | 0 | -0.250659 | -2.393508 | 3.142691 |
| 1 | 0 | -0.314744 | -2.550673 | 4.223471 |
| 1 | 0 | -0.662152 | -3.277761 | 2.647446 |
| 1 | 0 | 0.802289  | -2.306752 | 2.861307 |
| 6 | 0 | -2.527371 | -1.329878 | 3.073396 |
| 1 | 0 | -2.887985 | -2.298955 | 2.716262 |

|    |   |           |           |           |
|----|---|-----------|-----------|-----------|
| 1  | 0 | -2.660032 | -1.305500 | 4.160266  |
| 1  | 0 | -3.147719 | -0.550230 | 2.628328  |
| 8  | 0 | -2.768560 | 0.603396  | -1.742484 |
| 6  | 0 | -2.999631 | -0.601996 | -1.694407 |
| 7  | 0 | -4.174993 | -1.142635 | -1.249225 |
| 1  | 0 | -4.229123 | -2.152340 | -1.252446 |
| 6  | 0 | -1.990244 | -1.646524 | -2.196242 |
| 1  | 0 | -2.399793 | -2.006108 | -3.155852 |
| 6  | 0 | -5.345359 | -0.494287 | -0.777785 |
| 6  | 0 | -6.399782 | -1.319856 | -0.353098 |
| 6  | 0 | -5.490591 | 0.900589  | -0.729244 |
| 6  | 0 | -7.588304 | -0.761397 | 0.113451  |
| 1  | 0 | -6.291378 | -2.401885 | -0.393604 |
| 6  | 0 | -6.689320 | 1.444628  | -0.258255 |
| 1  | 0 | -4.682482 | 1.537949  | -1.059099 |
| 6  | 0 | -7.739997 | 0.627719  | 0.164532  |
| 1  | 0 | -8.395228 | -1.413530 | 0.434017  |
| 1  | 0 | -6.797520 | 2.525040  | -0.228098 |
| 1  | 0 | -8.665904 | 1.064831  | 0.524925  |
| 6  | 0 | 0.363900  | -2.024798 | -2.195116 |
| 1  | 0 | 1.346046  | -2.051395 | -2.657195 |
| 45 | 0 | 0.783375  | 0.024012  | -0.917284 |
| 1  | 0 | -0.610167 | 0.717456  | -1.175001 |
| 6  | 0 | -0.612555 | -1.117877 | -2.534620 |
| 1  | 0 | -0.490028 | -0.321854 | -3.263702 |
| 15 | 0 | 1.254174  | 2.165392  | -0.428554 |
| 8  | 0 | 1.612997  | 2.894805  | -1.845287 |
| 8  | 0 | 0.075077  | 3.113974  | 0.164899  |
| 8  | 0 | 2.533808  | 2.561294  | 0.490772  |
| 6  | 0 | 1.937742  | 4.318363  | -1.748288 |
| 6  | 0 | 0.394410  | 4.539298  | 0.224584  |
| 6  | 0 | 2.815060  | 3.992461  | 0.584830  |
| 6  | 0 | 1.824450  | 4.782236  | -0.286145 |
| 1  | 0 | 1.235597  | 4.849951  | -2.396839 |
| 1  | 0 | 2.953251  | 4.445466  | -2.134752 |
| 1  | 0 | -0.348937 | 5.057921  | -0.387822 |
| 1  | 0 | 0.282337  | 4.849881  | 1.267533  |
| 1  | 0 | 2.732802  | 4.268493  | 1.640388  |
| 1  | 0 | 3.848164  | 4.135496  | 0.254903  |
| 1  | 0 | 2.055991  | 5.851637  | -0.224882 |
| 15 | 0 | 2.881162  | -1.082869 | -0.368679 |
| 8  | 0 | 2.751036  | -2.373922 | 0.638777  |
| 8  | 0 | 3.660923  | -1.755938 | -1.651224 |
| 8  | 0 | 4.082236  | -0.230224 | 0.333687  |
| 6  | 0 | 3.991935  | -3.100595 | 0.900406  |
| 6  | 0 | 4.911698  | -2.447008 | -1.346875 |
| 6  | 0 | 5.298294  | -0.972710 | 0.648208  |
| 6  | 0 | 5.165199  | -2.426975 | 0.169658  |
| 1  | 0 | 3.842666  | -4.129613 | 0.559038  |
| 1  | 0 | 4.142722  | -3.100711 | 1.984073  |
| 1  | 0 | 4.814100  | -3.468931 | -1.725579 |

|   |   |           |           |           |
|---|---|-----------|-----------|-----------|
| 1 | 0 | 5.709186  | -1.936507 | -1.895271 |
| 1 | 0 | 6.125703  | -0.458747 | 0.149985  |
| 1 | 0 | 5.441846  | -0.915754 | 1.731635  |
| 1 | 0 | 6.090506  | -2.970677 | 0.391039  |
| 6 | 0 | -1.709171 | -2.863998 | -1.263240 |
| 1 | 0 | -2.381694 | -3.703403 | -1.463215 |
| 1 | 0 | -1.833151 | -2.557392 | -0.224654 |
| 6 | 0 | -0.228335 | -3.247229 | -1.521236 |
| 1 | 0 | 0.297954  | -3.540035 | -0.608195 |
| 1 | 0 | -0.146723 | -4.090543 | -2.221207 |

Im13

|    |   |           |           |           |
|----|---|-----------|-----------|-----------|
| 5  | 0 | 2.146957  | 0.125784  | -0.792672 |
| 8  | 0 | 2.536411  | 0.089932  | -2.108368 |
| 8  | 0 | 3.124608  | 0.555224  | 0.058320  |
| 6  | 0 | 3.836758  | 0.776882  | -2.199071 |
| 6  | 0 | 4.370512  | 0.665555  | -0.715152 |
| 6  | 0 | 5.170082  | -0.614076 | -0.443996 |
| 1  | 0 | 4.626161  | -1.505981 | -0.766844 |
| 1  | 0 | 6.139342  | -0.591959 | -0.951028 |
| 1  | 0 | 5.350173  | -0.696795 | 0.631658  |
| 6  | 0 | 5.137208  | 1.884544  | -0.209847 |
| 1  | 0 | 6.051119  | 2.035933  | -0.794185 |
| 1  | 0 | 4.535202  | 2.793449  | -0.262061 |
| 1  | 0 | 5.426182  | 1.727853  | 0.833414  |
| 6  | 0 | 3.539775  | 2.213599  | -2.642599 |
| 1  | 0 | 4.461803  | 2.787652  | -2.775236 |
| 1  | 0 | 3.015425  | 2.187143  | -3.602263 |
| 1  | 0 | 2.901030  | 2.732674  | -1.922726 |
| 6  | 0 | 4.681315  | 0.059823  | -3.248385 |
| 1  | 0 | 4.215137  | 0.168747  | -4.231893 |
| 1  | 0 | 5.683138  | 0.499229  | -3.301382 |
| 1  | 0 | 4.779776  | -1.006252 | -3.035175 |
| 8  | 0 | -2.161429 | -0.492950 | -0.512198 |
| 6  | 0 | -2.731098 | -0.802329 | -1.575173 |
| 7  | 0 | -4.068144 | -0.679629 | -1.755064 |
| 1  | 0 | -4.417295 | -0.985347 | -2.654240 |
| 6  | 0 | -1.953434 | -1.401522 | -2.745076 |
| 1  | 0 | -2.428919 | -1.127882 | -3.692857 |
| 6  | 0 | -5.076552 | -0.255668 | -0.843797 |
| 6  | 0 | -6.407314 | -0.474136 | -1.232303 |
| 6  | 0 | -4.793869 | 0.369599  | 0.378876  |
| 6  | 0 | -7.454197 | -0.075174 | -0.403178 |
| 1  | 0 | -6.624518 | -0.959485 | -2.181440 |
| 6  | 0 | -5.855988 | 0.759546  | 1.199722  |
| 1  | 0 | -3.770056 | 0.550641  | 0.674122  |
| 6  | 0 | -7.182697 | 0.542331  | 0.821310  |
| 1  | 0 | -8.479412 | -0.250595 | -0.714251 |
| 1  | 0 | -5.636285 | 1.240485  | 2.148531  |
| 1  | 0 | -7.996271 | 0.850647  | 1.470358  |
| 15 | 0 | 0.945937  | -1.538830 | 1.276002  |

|    |   |           |           |           |
|----|---|-----------|-----------|-----------|
| 8  | 0 | 1.454307  | -0.782464 | 2.618938  |
| 8  | 0 | -0.200112 | -2.547127 | 1.862055  |
| 8  | 0 | 2.168189  | -2.579407 | 0.967295  |
| 6  | 0 | 1.908844  | -1.649666 | 3.701170  |
| 6  | 0 | 0.209541  | -3.361848 | 3.004989  |
| 6  | 0 | 2.543113  | -3.452199 | 2.078232  |
| 6  | 0 | 1.696096  | -3.122331 | 3.317422  |
| 1  | 0 | 1.333220  | -1.375694 | 4.590037  |
| 1  | 0 | 2.965863  | -1.425322 | 3.874098  |
| 1  | 0 | -0.429744 | -3.083860 | 3.848434  |
| 1  | 0 | 0.016624  | -4.404873 | 2.737238  |
| 1  | 0 | 2.389331  | -4.483534 | 1.746071  |
| 1  | 0 | 3.608736  | -3.290752 | 2.265713  |
| 1  | 0 | 2.001936  | -3.766006 | 4.150019  |
| 15 | 0 | -0.070853 | 1.880610  | 0.570407  |
| 8  | 0 | 0.520280  | 3.104846  | -0.356969 |
| 8  | 0 | -1.628906 | 2.360190  | 0.771889  |
| 8  | 0 | 0.568666  | 2.231305  | 2.032142  |
| 6  | 0 | 0.289709  | 4.455158  | 0.145181  |
| 6  | 0 | -1.816386 | 3.710202  | 1.291891  |
| 6  | 0 | 0.379211  | 3.597978  | 2.501996  |
| 6  | 0 | -0.455086 | 4.396862  | 1.488022  |
| 1  | 0 | -0.289562 | 4.990853  | -0.613495 |
| 1  | 0 | 1.268512  | 4.933328  | 0.251022  |
| 1  | 0 | -2.438494 | 4.249277  | 0.570778  |
| 1  | 0 | -2.359969 | 3.623857  | 2.238130  |
| 1  | 0 | -0.120520 | 3.537813  | 3.473771  |
| 1  | 0 | 1.373364  | 4.035421  | 2.637984  |
| 1  | 0 | -0.610585 | 5.414631  | 1.863396  |
| 45 | 0 | 0.197694  | -0.318734 | -0.393839 |
| 6  | 0 | -0.470093 | -0.970597 | -2.691789 |
| 1  | 0 | -0.377140 | 0.115392  | -2.375890 |
| 6  | 0 | 0.203488  | -1.936625 | -1.727755 |
| 1  | 0 | 1.224793  | -2.208082 | -1.985361 |
| 6  | 0 | -0.743898 | -3.127899 | -1.506210 |
| 1  | 0 | -1.175359 | -3.129517 | -0.501050 |
| 1  | 0 | -0.219530 | -4.080751 | -1.629732 |
| 6  | 0 | -1.855655 | -2.943799 | -2.565400 |
| 1  | 0 | -2.806156 | -3.405462 | -2.279238 |
| 1  | 0 | -1.551673 | -3.380665 | -3.523480 |
| 1  | 0 | 0.011925  | -0.953049 | -3.674848 |

Im14

|   |   |          |           |           |
|---|---|----------|-----------|-----------|
| 5 | 0 | 1.992417 | 0.387590  | -1.025589 |
| 8 | 0 | 2.528701 | -0.131411 | -2.179638 |
| 8 | 0 | 2.844300 | 1.231300  | -0.368137 |
| 6 | 0 | 3.786241 | 0.583703  | -2.448332 |
| 6 | 0 | 4.157888 | 1.144503  | -1.019225 |
| 6 | 0 | 4.997545 | 0.176573  | -0.176686 |
| 1 | 0 | 4.547509 | -0.819762 | -0.143164 |
| 1 | 0 | 6.016287 | 0.088624  | -0.566065 |



|    |   |           |           |           |
|----|---|-----------|-----------|-----------|
| 1  | 0 | 5.053937  | 0.559013  | 0.846521  |
| 6  | 0 | 4.789004  | 2.534222  | -1.012828 |
| 1  | 0 | 5.747262  | 2.526702  | -1.543352 |
| 1  | 0 | 4.139231  | 3.277500  | -1.478316 |
| 1  | 0 | 4.978230  | 2.844915  | 0.018857  |
| 6  | 0 | 3.455606  | 1.675328  | -3.473158 |
| 1  | 0 | 4.352356  | 2.226474  | -3.772130 |
| 1  | 0 | 3.032310  | 1.207143  | -4.366512 |
| 1  | 0 | 2.723461  | 2.388450  | -3.083607 |
| 6  | 0 | 4.786109  | -0.408116 | -3.036321 |
| 1  | 0 | 4.426064  | -0.761525 | -4.006954 |
| 1  | 0 | 5.757859  | 0.072106  | -3.193358 |
| 1  | 0 | 4.927781  | -1.276176 | -2.389725 |
| 8  | 0 | -2.167500 | -0.750680 | -0.309081 |
| 6  | 0 | -2.655147 | -1.088260 | -1.402167 |
| 7  | 0 | -3.954726 | -0.891526 | -1.728768 |
| 1  | 0 | -4.233881 | -1.233619 | -2.638970 |
| 6  | 0 | -1.817348 | -1.848544 | -2.432416 |
| 1  | 0 | -2.249420 | -1.730363 | -3.431934 |
| 6  | 0 | -5.013651 | -0.324739 | -0.964830 |
| 6  | 0 | -6.295423 | -0.378103 | -1.534301 |
| 6  | 0 | -4.825545 | 0.272606  | 0.289725  |
| 6  | 0 | -7.387522 | 0.158800  | -0.855268 |
| 1  | 0 | -6.439707 | -0.841740 | -2.507905 |
| 6  | 0 | -5.932905 | 0.802772  | 0.958221  |
| 1  | 0 | -3.837631 | 0.324060  | 0.724866  |
| 6  | 0 | -7.211434 | 0.751233  | 0.398768  |
| 1  | 0 | -8.373981 | 0.110148  | -1.305953 |
| 1  | 0 | -5.787491 | 1.259586  | 1.932925  |
| 1  | 0 | -8.061313 | 1.165889  | 0.931666  |
| 15 | 0 | 0.964132  | -1.471798 | 1.396112  |
| 8  | 0 | 1.540466  | -0.680385 | 2.702558  |
| 8  | 0 | -0.073691 | -2.540194 | 2.090113  |
| 8  | 0 | 2.230530  | -2.458030 | 1.027279  |
| 6  | 0 | 2.087093  | -1.508928 | 3.769302  |
| 6  | 0 | 0.464334  | -3.332436 | 3.191181  |
| 6  | 0 | 2.736595  | -3.282180 | 2.119972  |
| 6  | 0 | 1.948171  | -2.995485 | 3.407789  |
| 1  | 0 | 1.535414  | -1.263990 | 4.682114  |
| 1  | 0 | 3.135659  | -1.222383 | 3.897268  |
| 1  | 0 | -0.133787 | -3.104314 | 4.078868  |
| 1  | 0 | 0.325386  | -4.386139 | 2.929370  |
| 1  | 0 | 2.636576  | -4.327921 | 1.812104  |
| 1  | 0 | 3.798312  | -3.045399 | 2.239913  |
| 1  | 0 | 2.346637  | -3.609734 | 4.223126  |
| 15 | 0 | -0.109561 | 1.834347  | 0.583813  |
| 8  | 0 | 0.188315  | 3.146533  | -0.338548 |
| 8  | 0 | -1.643804 | 2.109584  | 1.071579  |
| 8  | 0 | 0.735437  | 2.146391  | 1.935679  |
| 6  | 0 | -0.013158 | 4.433429  | 0.320132  |
| 6  | 0 | -1.878480 | 3.424554  | 1.666400  |

|    |   |           |           |           |
|----|---|-----------|-----------|-----------|
| 6  | 0 | 0.465038  | 3.433463  | 2.567166  |
| 6  | 0 | -0.563438 | 4.218474  | 1.738781  |
| 1  | 0 | -0.710843 | 5.001793  | -0.301954 |
| 1  | 0 | 0.953351  | 4.946458  | 0.337464  |
| 1  | 0 | -2.622148 | 3.932394  | 1.044726  |
| 1  | 0 | -2.298602 | 3.253577  | 2.661973  |
| 1  | 0 | 0.098704  | 3.227458  | 3.577716  |
| 1  | 0 | 1.419797  | 3.963722  | 2.632046  |
| 1  | 0 | -0.750145 | 5.190072  | 2.210031  |
| 45 | 0 | 0.109487  | -0.157746 | -0.445343 |
| 6  | 0 | -0.343502 | -1.433517 | -2.421567 |
| 1  | 0 | -0.325128 | 0.800819  | -1.618269 |
| 6  | 0 | 0.397137  | -2.308467 | -1.666614 |
| 1  | 0 | 1.480183  | -2.324006 | -1.667599 |
| 6  | 0 | -0.442884 | -3.476882 | -1.177668 |
| 1  | 0 | -0.645373 | -3.439191 | -0.104268 |
| 1  | 0 | 0.080435  | -4.419892 | -1.370769 |
| 6  | 0 | -1.742234 | -3.355196 | -2.012572 |
| 1  | 0 | -2.631725 | -3.688675 | -1.470406 |
| 1  | 0 | -1.661000 | -3.961134 | -2.920632 |
| 1  | 0 | 0.074374  | -0.745568 | -3.144163 |

TS1

|    |   |           |           |           |
|----|---|-----------|-----------|-----------|
| 45 | 0 | 0.283832  | 0.257818  | -0.496086 |
| 1  | 0 | 0.713398  | -1.254323 | -1.434783 |
| 5  | 0 | 1.970859  | -1.234105 | -1.227748 |
| 8  | 0 | 2.818389  | -0.793202 | -2.210184 |
| 8  | 0 | 2.547712  | -2.095939 | -0.341051 |
| 6  | 0 | 3.791054  | -3.765811 | -1.541930 |
| 1  | 0 | 3.102381  | -3.731079 | -2.390883 |
| 1  | 0 | 4.767922  | -4.103960 | -1.900294 |
| 1  | 0 | 3.413539  | -4.505055 | -0.830020 |
| 6  | 0 | 4.840043  | -2.496775 | 0.354659  |
| 1  | 0 | 5.870491  | -2.655495 | 0.019409  |
| 1  | 0 | 4.805476  | -1.594695 | 0.968039  |
| 1  | 0 | 4.556789  | -3.346220 | 0.982876  |
| 6  | 0 | 4.821530  | 0.012956  | -1.146476 |
| 1  | 0 | 5.857172  | -0.195294 | -0.861840 |
| 1  | 0 | 4.822771  | 0.851710  | -1.848441 |
| 1  | 0 | 4.264389  | 0.320337  | -0.257524 |
| 6  | 0 | 4.942687  | -1.569299 | -3.093968 |
| 1  | 0 | 5.059608  | -0.681211 | -3.721768 |
| 1  | 0 | 5.943083  | -1.939933 | -2.846674 |
| 1  | 0 | 4.423577  | -2.331637 | -3.677488 |
| 8  | 0 | -2.167926 | -0.098194 | -0.959170 |
| 6  | 0 | -2.776415 | 0.526735  | -1.838698 |
| 7  | 0 | -4.132724 | 0.537704  | -1.944174 |
| 1  | 0 | -4.507819 | 1.042464  | -2.735928 |
| 6  | 0 | -2.024494 | 1.358372  | -2.868943 |
| 1  | 0 | -2.715074 | 1.716420  | -3.637792 |
| 6  | 0 | -0.870622 | 0.525424  | -3.506221 |

|    |   |           |           |           |
|----|---|-----------|-----------|-----------|
| 1  | 0 | -1.036425 | -0.553601 | -3.440089 |
| 1  | 0 | -0.770142 | 0.767478  | -4.573008 |
| 6  | 0 | -1.308697 | 2.563472  | -2.171883 |
| 1  | 0 | -1.753460 | 2.837215  | -1.210935 |
| 1  | 0 | -1.359604 | 3.454842  | -2.811672 |
| 6  | 0 | 0.138010  | 2.130119  | -2.065745 |
| 6  | 0 | 0.380673  | 0.997908  | -2.798042 |
| 1  | 0 | 1.369195  | 0.650316  | -3.075130 |
| 1  | 0 | 0.917892  | 2.806574  | -1.737076 |
| 6  | 0 | -5.111552 | -0.091815 | -1.127894 |
| 6  | 0 | -6.423777 | -0.124674 | -1.624695 |
| 6  | 0 | -4.825079 | -0.638406 | 0.131249  |
| 6  | 0 | -7.446111 | -0.699368 | -0.871807 |
| 1  | 0 | -6.644819 | 0.297238  | -2.602706 |
| 6  | 0 | -5.861983 | -1.211586 | 0.872894  |
| 1  | 0 | -3.814763 | -0.610575 | 0.514941  |
| 6  | 0 | -7.169480 | -1.248565 | 0.383588  |
| 1  | 0 | -8.456529 | -0.718429 | -1.268434 |
| 1  | 0 | -5.641505 | -1.630365 | 1.850792  |
| 1  | 0 | -7.963804 | -1.697019 | 0.971894  |
| 15 | 0 | -0.115958 | -1.062281 | 1.288630  |
| 8  | 0 | 1.041664  | -1.410761 | 2.372902  |
| 8  | 0 | -1.341780 | -0.562956 | 2.244730  |
| 8  | 0 | -0.626369 | -2.536054 | 0.821496  |
| 6  | 0 | 0.677483  | -2.410904 | 3.370297  |
| 6  | 0 | -1.636730 | -1.443553 | 3.373387  |
| 6  | 0 | -1.094853 | -3.402857 | 1.898740  |
| 6  | 0 | -0.819763 | -2.741205 | 3.258819  |
| 1  | 0 | 0.925047  | -1.984232 | 4.346558  |
| 1  | 0 | 1.299990  | -3.293897 | 3.194082  |
| 1  | 0 | -1.397536 | -0.895715 | 4.290474  |
| 1  | 0 | -2.712054 | -1.641079 | 3.344102  |
| 1  | 0 | -2.164013 | -3.575366 | 1.740377  |
| 1  | 0 | -0.557708 | -4.349843 | 1.795754  |
| 1  | 0 | -1.106346 | -3.426506 | 4.064507  |
| 15 | 0 | 0.967322  | 1.939559  | 0.813647  |
| 8  | 0 | 2.362722  | 2.661913  | 0.323189  |
| 8  | 0 | -0.018696 | 3.251653  | 0.953960  |
| 8  | 0 | 1.301550  | 1.624597  | 2.383771  |
| 6  | 0 | 2.788644  | 3.824024  | 1.097567  |
| 6  | 0 | 0.443289  | 4.313979  | 1.840173  |
| 6  | 0 | 1.867083  | 2.725166  | 3.155127  |
| 6  | 0 | 1.871992  | 4.012096  | 2.316471  |
| 1  | 0 | 2.758035  | 4.694374  | 0.433582  |
| 1  | 0 | 3.824769  | 3.641630  | 1.397545  |
| 1  | 0 | 0.397553  | 5.247940  | 1.271698  |
| 1  | 0 | -0.257126 | 4.373178  | 2.679641  |
| 1  | 0 | 1.249671  | 2.833794  | 4.051683  |
| 1  | 0 | 2.879927  | 2.432546  | 3.450126  |
| 1  | 0 | 2.240370  | 4.844839  | 2.926297  |
| 6  | 0 | 3.894229  | -2.406710 | -0.839963 |

6 0 4.177743 -1.202089 -1.825268

TS2

|    |   |           |           |           |
|----|---|-----------|-----------|-----------|
| 45 | 0 | -0.274849 | -0.197441 | -0.652888 |
| 1  | 0 | -0.314050 | 0.527270  | -2.092320 |
| 5  | 0 | -2.317469 | -0.022843 | -0.695796 |
| 8  | 0 | -3.066146 | -0.700861 | -1.629628 |
| 8  | 0 | -3.076703 | 0.749345  | 0.138894  |
| 6  | 0 | -4.620543 | 2.050648  | -1.174267 |
| 1  | 0 | -3.927394 | 2.099110  | -2.018776 |
| 1  | 0 | -5.641349 | 2.154807  | -1.554437 |
| 1  | 0 | -4.412369 | 2.901080  | -0.518977 |
| 6  | 0 | -5.404650 | 0.745296  | 0.820741  |
| 1  | 0 | -6.445855 | 0.688069  | 0.485682  |
| 1  | 0 | -5.205429 | -0.092728 | 1.490835  |
| 1  | 0 | -5.284335 | 1.671330  | 1.390296  |
| 6  | 0 | -4.868854 | -1.815300 | -0.488579 |
| 1  | 0 | -5.926831 | -1.804492 | -0.209676 |
| 1  | 0 | -4.695375 | -2.687618 | -1.125730 |
| 1  | 0 | -4.265737 | -1.927745 | 0.416321  |
| 6  | 0 | -5.299845 | -0.443240 | -2.547685 |
| 1  | 0 | -5.224932 | -1.379529 | -3.108519 |
| 1  | 0 | -6.357526 | -0.272832 | -2.319809 |
| 1  | 0 | -4.948490 | 0.366667  | -3.189776 |
| 8  | 0 | 2.060286  | -0.345569 | -0.754311 |
| 6  | 0 | 2.684083  | -0.998096 | -1.610215 |
| 7  | 0 | 4.037859  | -1.003022 | -1.677126 |
| 1  | 0 | 4.438527  | -1.591644 | -2.395225 |
| 6  | 0 | 1.954552  | -1.838465 | -2.647306 |
| 1  | 0 | 2.677710  | -2.383009 | -3.261202 |
| 6  | 0 | 1.035177  | -0.950693 | -3.539254 |
| 1  | 0 | 1.431340  | 0.052607  | -3.716622 |
| 1  | 0 | 0.912139  | -1.430444 | -4.519076 |
| 6  | 0 | 0.959915  | -2.811513 | -1.950615 |
| 1  | 0 | 1.302246  | -3.153534 | -0.971107 |
| 1  | 0 | 0.827716  | -3.702851 | -2.579621 |
| 6  | 0 | -0.353962 | -2.046658 | -1.913383 |
| 6  | 0 | -0.319950 | -0.982673 | -2.845233 |
| 1  | 0 | -1.216253 | -0.659359 | -3.363771 |
| 1  | 0 | -1.283242 | -2.548389 | -1.669756 |
| 6  | 0 | 4.993830  | -0.336189 | -0.859923 |
| 6  | 0 | 6.338327  | -0.690351 | -1.052960 |
| 6  | 0 | 4.652312  | 0.641245  | 0.086022  |
| 6  | 0 | 7.340394  | -0.075461 | -0.304879 |
| 1  | 0 | 6.601106  | -1.448343 | -1.787818 |
| 6  | 0 | 5.670683  | 1.245055  | 0.829621  |
| 1  | 0 | 3.618989  | 0.923810  | 0.232329  |
| 6  | 0 | 7.010152  | 0.896361  | 0.644357  |
| 1  | 0 | 8.376460  | -0.358040 | -0.464010 |
| 1  | 0 | 5.405967  | 2.000874  | 1.563426  |
| 1  | 0 | 7.788560  | 1.375736  | 1.229616  |

|    |   |           |           |           |
|----|---|-----------|-----------|-----------|
| 15 | 0 | -0.139803 | 1.938234  | 0.225356  |
| 8  | 0 | -0.781070 | 2.277324  | 1.685586  |
| 8  | 0 | 1.398943  | 2.474307  | 0.407469  |
| 8  | 0 | -0.780776 | 3.115505  | -0.716656 |
| 6  | 0 | -0.603767 | 3.642954  | 2.159599  |
| 6  | 0 | 1.533637  | 3.853861  | 0.863101  |
| 6  | 0 | -0.652129 | 4.474985  | -0.205425 |
| 6  | 0 | 0.147382  | 4.472452  | 1.106908  |
| 1  | 0 | -0.048598 | 3.590749  | 3.101690  |
| 1  | 0 | -1.601421 | 4.048715  | 2.354319  |
| 1  | 0 | 2.127771  | 3.833136  | 1.782045  |
| 1  | 0 | 2.086603  | 4.398532  | 0.091283  |
| 1  | 0 | -0.150737 | 5.062424  | -0.980670 |
| 1  | 0 | -1.663517 | 4.866870  | -0.057724 |
| 1  | 0 | 0.264821  | 5.501299  | 1.465625  |
| 15 | 0 | -0.364416 | -1.429636 | 1.346060  |
| 8  | 0 | -1.830447 | -1.968491 | 1.841233  |
| 8  | 0 | 0.499904  | -2.829136 | 1.351079  |
| 8  | 0 | 0.203513  | -0.697866 | 2.692316  |
| 6  | 0 | -1.837818 | -2.757093 | 3.069334  |
| 6  | 0 | 0.489313  | -3.579320 | 2.603042  |
| 6  | 0 | 0.143507  | -1.474935 | 3.923594  |
| 6  | 0 | -0.411979 | -2.877415 | 3.631176  |
| 1  | 0 | -2.256399 | -3.737985 | 2.823006  |
| 1  | 0 | -2.504251 | -2.249555 | 3.773342  |
| 1  | 0 | 0.126564  | -4.585616 | 2.371664  |
| 1  | 0 | 1.523956  | -3.643394 | 2.954404  |
| 1  | 0 | 1.160081  | -1.520520 | 4.326047  |
| 1  | 0 | -0.495639 | -0.926797 | 4.622934  |
| 1  | 0 | -0.434018 | -3.463313 | 4.557019  |
| 6  | 0 | -4.452802 | 0.753951  | -0.372613 |
| 6  | 0 | -4.482468 | -0.549498 | -1.263082 |

TS3

|    |   |           |           |           |
|----|---|-----------|-----------|-----------|
| 45 | 0 | 0.291120  | 0.329176  | -0.433450 |
| 1  | 0 | -0.002020 | -0.814088 | -2.653089 |
| 5  | 0 | 2.265416  | -0.191545 | -0.492664 |
| 8  | 0 | 2.675759  | -0.956475 | -1.557732 |
| 8  | 0 | 3.273155  | 0.080349  | 0.393399  |
| 6  | 0 | 4.431324  | -1.961513 | 0.922575  |
| 1  | 0 | 3.519855  | -2.549955 | 0.789497  |
| 1  | 0 | 5.299079  | -2.600504 | 0.732834  |
| 1  | 0 | 4.469715  | -1.631960 | 1.964874  |
| 6  | 0 | 5.696617  | 0.103750  | 0.264833  |
| 1  | 0 | 6.590430  | -0.440578 | -0.058474 |
| 1  | 0 | 5.664370  | 1.060699  | -0.259363 |
| 1  | 0 | 5.794562  | 0.304521  | 1.335742  |
| 6  | 0 | 4.683104  | 0.003970  | -2.476622 |
| 1  | 0 | 5.775254  | -0.029481 | -2.535015 |
| 1  | 0 | 4.283339  | -0.196204 | -3.474874 |
| 1  | 0 | 4.382008  | 1.014424  | -2.185375 |

|    |   |           |           |           |
|----|---|-----------|-----------|-----------|
| 6  | 0 | 4.552243  | -2.447593 | -1.959495 |
| 1  | 0 | 4.270068  | -2.589040 | -3.007001 |
| 1  | 0 | 5.637399  | -2.575953 | -1.884743 |
| 1  | 0 | 4.069486  | -3.227140 | -1.367403 |
| 8  | 0 | -2.003597 | 0.531055  | -0.734184 |
| 6  | 0 | -2.614829 | 1.088230  | -1.667029 |
| 7  | 0 | -3.965366 | 1.222213  | -1.662859 |
| 1  | 0 | -4.353043 | 1.695963  | -2.467829 |
| 6  | 0 | -1.904183 | 1.633453  | -2.895791 |
| 1  | 0 | -2.594395 | 2.268857  | -3.461152 |
| 6  | 0 | -1.349736 | 0.485198  | -3.788297 |
| 1  | 0 | -2.020533 | -0.378109 | -3.838369 |
| 1  | 0 | -1.249175 | 0.873628  | -4.807448 |
| 6  | 0 | -0.621218 | 2.397958  | -2.510474 |
| 1  | 0 | -0.764920 | 3.076062  | -1.666017 |
| 1  | 0 | -0.329929 | 3.014819  | -3.373042 |
| 6  | 0 | 0.442109  | 1.310882  | -2.291576 |
| 6  | 0 | 0.044021  | 0.137399  | -3.205381 |
| 1  | 0 | 0.793280  | -0.026193 | -3.987935 |
| 1  | 0 | 1.454061  | 1.681426  | -2.447176 |
| 6  | 0 | -4.933155 | 0.810588  | -0.706512 |
| 6  | 0 | -6.265723 | 1.160757  | -0.978426 |
| 6  | 0 | -4.621952 | 0.088447  | 0.454920  |
| 6  | 0 | -7.283198 | 0.795321  | -0.099735 |
| 1  | 0 | -6.506463 | 1.720997  | -1.879501 |
| 6  | 0 | -5.655763 | -0.269318 | 1.325660  |
| 1  | 0 | -3.599427 | -0.187086 | 0.670288  |
| 6  | 0 | -6.982403 | 0.076211  | 1.060918  |
| 1  | 0 | -8.308542 | 1.073355  | -0.323394 |
| 1  | 0 | -5.413220 | -0.828460 | 2.224804  |
| 1  | 0 | -7.772666 | -0.209864 | 1.747841  |
| 15 | 0 | -0.096040 | -1.089945 | 1.565166  |
| 8  | 0 | 0.062013  | -0.336281 | 3.016634  |
| 8  | 0 | -1.598126 | -1.753616 | 1.734442  |
| 8  | 0 | 0.857568  | -2.413794 | 1.789286  |
| 6  | 0 | -0.167197 | -1.145126 | 4.202317  |
| 6  | 0 | -1.819364 | -2.542126 | 2.939043  |
| 6  | 0 | 0.602633  | -3.199387 | 2.988094  |
| 6  | 0 | -0.545676 | -2.577041 | 3.797134  |
| 1  | 0 | -0.968259 | -0.666741 | 4.775489  |
| 1  | 0 | 0.753550  | -1.126659 | 4.794886  |
| 1  | 0 | -2.651491 | -2.082935 | 3.482825  |
| 1  | 0 | -2.114690 | -3.548013 | 2.622169  |
| 1  | 0 | 0.357756  | -4.217301 | 2.666708  |
| 1  | 0 | 1.531735  | -3.222898 | 3.566732  |
| 1  | 0 | -0.727110 | -3.178377 | 4.695208  |
| 15 | 0 | 0.957966  | 2.165219  | 0.539290  |
| 8  | 0 | 2.019572  | 3.107630  | -0.270818 |
| 8  | 0 | -0.273547 | 3.215285  | 0.793144  |
| 8  | 0 | 1.625455  | 2.064058  | 2.012365  |
| 6  | 0 | 2.401764  | 4.344888  | 0.403829  |

|   |   |           |           |           |
|---|---|-----------|-----------|-----------|
| 6 | 0 | 0.103997  | 4.486365  | 1.407362  |
| 6 | 0 | 1.950558  | 3.332298  | 2.652501  |
| 6 | 0 | 1.610440  | 4.498742  | 1.712486  |
| 1 | 0 | 2.194602  | 5.164031  | -0.291435 |
| 1 | 0 | 3.479163  | 4.295525  | 0.589415  |
| 1 | 0 | -0.170727 | 5.280493  | 0.705746  |
| 1 | 0 | -0.492886 | 4.590838  | 2.318189  |
| 1 | 0 | 1.375255  | 3.381522  | 3.582286  |
| 1 | 0 | 3.018074  | 3.304018  | 2.890813  |
| 1 | 0 | 1.878259  | 5.447166  | 2.191926  |
| 6 | 0 | 4.439352  | -0.725688 | 0.014753  |
| 6 | 0 | 4.142702  | -1.050017 | -1.502774 |
| 8 | 0 | -0.450015 | -2.433924 | -1.208166 |
| 6 | 0 | -1.810565 | -2.898858 | -1.376239 |
| 6 | 0 | 0.479349  | -3.527747 | -1.432088 |
| 6 | 0 | -1.735121 | -4.423018 | -1.291882 |
| 1 | 0 | -2.419014 | -2.434928 | -0.598381 |
| 1 | 0 | -2.178418 | -2.577080 | -2.361157 |
| 6 | 0 | -0.364744 | -4.706669 | -1.928990 |
| 1 | 0 | 1.235490  | -3.192214 | -2.145910 |
| 1 | 0 | 0.971576  | -3.746401 | -0.477620 |
| 1 | 0 | -2.564318 | -4.913902 | -1.809187 |
| 1 | 0 | -1.747365 | -4.747851 | -0.244869 |
| 1 | 0 | -0.444628 | -4.692567 | -3.021911 |
| 1 | 0 | 0.057857  | -5.672096 | -1.636476 |

TS4

|   |   |           |           |           |
|---|---|-----------|-----------|-----------|
| 5 | 0 | -1.871547 | -1.134972 | -1.018710 |
| 8 | 0 | -2.809107 | -0.484153 | -1.812115 |
| 8 | 0 | -2.488977 | -2.011510 | -0.127951 |
| 6 | 0 | -4.113698 | -1.102531 | -1.586726 |
| 6 | 0 | -3.927528 | -1.771489 | -0.168686 |
| 6 | 0 | -4.284922 | -0.840038 | 0.997775  |
| 1 | 0 | -3.801423 | 0.135027  | 0.904137  |
| 1 | 0 | -5.367589 | -0.691922 | 1.063972  |
| 1 | 0 | -3.941140 | -1.296341 | 1.929656  |
| 6 | 0 | -4.636359 | -3.114603 | 0.007225  |
| 1 | 0 | -5.721041 | -2.998797 | -0.092603 |
| 1 | 0 | -4.296545 | -3.854261 | -0.720422 |
| 1 | 0 | -4.432154 | -3.506590 | 1.008055  |
| 6 | 0 | -4.328552 | -2.115230 | -2.720545 |
| 1 | 0 | -5.315270 | -2.583851 | -2.657188 |
| 1 | 0 | -4.258980 | -1.595521 | -3.680474 |
| 1 | 0 | -3.574819 | -2.908092 | -2.707583 |
| 6 | 0 | -5.182232 | -0.012853 | -1.655054 |
| 1 | 0 | -5.222074 | 0.400487  | -2.667572 |
| 1 | 0 | -6.170809 | -0.423098 | -1.422595 |
| 1 | 0 | -4.971038 | 0.803030  | -0.961352 |
| 8 | 0 | 2.295479  | -0.008377 | -0.888718 |
| 6 | 0 | 2.811925  | -0.896234 | -1.582349 |
| 7 | 0 | 4.147449  | -1.172877 | -1.556653 |

|    |   |           |           |           |
|----|---|-----------|-----------|-----------|
| 1  | 0 | 4.456567  | -1.893862 | -2.194484 |
| 6  | 0 | 1.973631  | -1.760501 | -2.513631 |
| 1  | 0 | 2.620615  | -2.495119 | -3.004796 |
| 6  | 0 | 5.185027  | -0.574944 | -0.793675 |
| 6  | 0 | 6.501130  | -0.947836 | -1.112003 |
| 6  | 0 | 4.950699  | 0.332748  | 0.250312  |
| 6  | 0 | 7.574829  | -0.420495 | -0.396970 |
| 1  | 0 | 6.684788  | -1.649911 | -1.922522 |
| 6  | 0 | 6.038806  | 0.854306  | 0.956088  |
| 1  | 0 | 3.938521  | 0.619812  | 0.496984  |
| 6  | 0 | 7.349214  | 0.486689  | 0.642839  |
| 1  | 0 | 8.586609  | -0.717817 | -0.655483 |
| 1  | 0 | 5.852179  | 1.557508  | 1.762815  |
| 1  | 0 | 8.184355  | 0.900404  | 1.199339  |
| 15 | 0 | -0.712939 | 1.813029  | 1.097607  |
| 8  | 0 | -2.283516 | 2.286567  | 1.034768  |
| 8  | 0 | -0.461855 | 1.713699  | 2.710405  |
| 8  | 0 | 0.042977  | 3.232525  | 0.749447  |
| 6  | 0 | -2.628755 | 3.482448  | 1.797416  |
| 6  | 0 | -0.905273 | 2.852334  | 3.504964  |
| 6  | 0 | -0.289829 | 4.365993  | 1.606024  |
| 6  | 0 | -1.406430 | 3.975252  | 2.585417  |
| 1  | 0 | -3.453489 | 3.208769  | 2.462228  |
| 1  | 0 | -2.979775 | 4.236767  | 1.085617  |
| 1  | 0 | -1.696907 | 2.498885  | 4.173805  |
| 1  | 0 | -0.047568 | 3.174934  | 4.102790  |
| 1  | 0 | 0.623913  | 4.658965  | 2.132831  |
| 1  | 0 | -0.600421 | 5.184677  | 0.949338  |
| 1  | 0 | -1.686149 | 4.845941  | 3.189307  |
| 15 | 0 | -0.032801 | -1.240230 | 1.503074  |
| 8  | 0 | 0.150357  | -2.847606 | 1.275722  |
| 8  | 0 | 1.302491  | -0.900222 | 2.381579  |
| 8  | 0 | -1.208830 | -1.197589 | 2.629718  |
| 6  | 0 | 0.182497  | -3.648448 | 2.495393  |
| 6  | 0 | 1.575157  | -1.812715 | 3.486187  |
| 6  | 0 | -0.896794 | -1.868500 | 3.884661  |
| 6  | 0 | 0.363784  | -2.730618 | 3.714985  |
| 1  | 0 | 1.018179  | -4.345014 | 2.385425  |
| 1  | 0 | -0.754201 | -4.212694 | 2.547472  |
| 1  | 0 | 2.475162  | -2.383668 | 3.235058  |
| 1  | 0 | 1.779594  | -1.189969 | 4.361733  |
| 1  | 0 | -0.758686 | -1.098174 | 4.650881  |
| 1  | 0 | -1.770258 | -2.476421 | 4.136970  |
| 1  | 0 | 0.522491  | -3.336756 | 4.613938  |
| 45 | 0 | -0.217514 | 0.091299  | -0.278389 |
| 6  | 0 | 0.862228  | -2.507577 | -1.722012 |
| 1  | 0 | 0.749359  | -3.498308 | -2.180327 |
| 1  | 0 | 1.124358  | -2.687713 | -0.682785 |
| 6  | 0 | -0.471621 | -1.731871 | -1.954982 |
| 1  | 0 | -1.215743 | -2.539310 | -2.017418 |
| 6  | 0 | -0.288904 | -1.164557 | -3.383790 |



|   |   |           |           |           |
|---|---|-----------|-----------|-----------|
| 1 | 0 | -0.890652 | -0.277632 | -3.577102 |
| 1 | 0 | -0.617404 | -1.927892 | -4.101811 |
| 6 | 0 | 1.220730  | -0.899049 | -3.574046 |
| 1 | 0 | 1.442287  | 0.156604  | -3.416618 |
| 1 | 0 | 1.549338  | -1.149265 | -4.586865 |
| 8 | 0 | -0.263087 | 1.620986  | -1.927136 |
| 6 | 0 | 0.886645  | 2.517977  | -2.120975 |
| 6 | 0 | -1.484892 | 2.264775  | -2.419350 |
| 6 | 0 | 0.297845  | 3.830316  | -2.632335 |
| 1 | 0 | 1.417665  | 2.603405  | -1.174852 |
| 1 | 0 | 1.541428  | 2.049694  | -2.859830 |
| 6 | 0 | -0.989242 | 3.374254  | -3.338288 |
| 1 | 0 | -2.086585 | 1.493445  | -2.895958 |
| 1 | 0 | -2.037273 | 2.656527  | -1.559371 |
| 1 | 0 | 0.990889  | 4.354188  | -3.296242 |
| 1 | 0 | 0.060232  | 4.493020  | -1.793978 |
| 1 | 0 | -0.766141 | 2.979541  | -4.335770 |
| 1 | 0 | -1.726736 | 4.174329  | -3.447923 |

TS5

|   |   |           |           |           |
|---|---|-----------|-----------|-----------|
| 5 | 0 | 1.643121  | 0.310045  | 1.162831  |
| 8 | 0 | 1.421890  | 0.359609  | 2.510137  |
| 8 | 0 | 2.766096  | 0.970988  | 0.756397  |
| 6 | 0 | 2.624493  | 0.948318  | 3.129583  |
| 6 | 0 | 3.274807  | 1.723744  | 1.915069  |
| 6 | 0 | 2.764495  | 3.160743  | 1.759139  |
| 1 | 0 | 1.671872  | 3.202139  | 1.770699  |
| 1 | 0 | 3.148371  | 3.806387  | 2.554789  |
| 1 | 0 | 3.112188  | 3.554761  | 0.799851  |
| 6 | 0 | 4.799666  | 1.694434  | 1.869529  |
| 1 | 0 | 5.221221  | 2.192471  | 2.749074  |
| 1 | 0 | 5.185340  | 0.674281  | 1.828327  |
| 1 | 0 | 5.149399  | 2.228164  | 0.981032  |
| 6 | 0 | 3.470578  | -0.224712 | 3.636518  |
| 1 | 0 | 4.363346  | 0.128389  | 4.161332  |
| 1 | 0 | 2.875502  | -0.815617 | 4.338439  |
| 1 | 0 | 3.785411  | -0.880410 | 2.819532  |
| 6 | 0 | 2.175561  | 1.824824  | 4.294479  |
| 1 | 0 | 1.715182  | 1.201916  | 5.066681  |
| 1 | 0 | 3.033228  | 2.337763  | 4.742642  |
| 1 | 0 | 1.444420  | 2.572460  | 3.982035  |
| 8 | 0 | -2.052541 | -0.880287 | 0.327302  |
| 6 | 0 | -2.682977 | -1.932790 | 0.581810  |
| 7 | 0 | -4.034021 | -1.976421 | 0.578132  |
| 1 | 0 | -4.432761 | -2.874811 | 0.818506  |
| 6 | 0 | -1.983270 | -3.228283 | 0.955433  |
| 1 | 0 | -2.670652 | -4.068631 | 0.810452  |
| 6 | 0 | -4.997379 | -0.953933 | 0.347832  |
| 6 | 0 | -6.325204 | -1.260370 | 0.683603  |
| 6 | 0 | -4.681555 | 0.293019  | -0.208016 |
| 6 | 0 | -7.336561 | -0.325694 | 0.471074  |

|    |   |           |           |           |
|----|---|-----------|-----------|-----------|
| 1  | 0 | -6.567404 | -2.229399 | 1.114485  |
| 6  | 0 | -5.708727 | 1.218827  | -0.412547 |
| 1  | 0 | -3.662762 | 0.527645  | -0.482199 |
| 6  | 0 | -7.031661 | 0.923337  | -0.077438 |
| 1  | 0 | -8.359530 | -0.574283 | 0.735959  |
| 1  | 0 | -5.467994 | 2.185245  | -0.846161 |
| 1  | 0 | -7.816766 | 1.654182  | -0.243681 |
| 15 | 0 | -0.384401 | 1.633222  | -0.810157 |
| 8  | 0 | 0.662673  | 2.475529  | -1.742405 |
| 8  | 0 | -1.741393 | 1.659313  | -1.738179 |
| 8  | 0 | -0.761912 | 2.743024  | 0.341054  |
| 6  | 0 | 0.226617  | 3.801435  | -2.158890 |
| 6  | 0 | -2.136410 | 2.967383  | -2.249060 |
| 6  | 0 | -1.256998 | 4.025577  | -0.146917 |
| 6  | 0 | -1.212318 | 4.057795  | -1.683593 |
| 1  | 0 | 0.300914  | 3.835351  | -3.250198 |
| 1  | 0 | 0.926382  | 4.526692  | -1.731002 |
| 1  | 0 | -2.085267 | 2.923532  | -3.341654 |
| 1  | 0 | -3.175974 | 3.128652  | -1.947692 |
| 1  | 0 | -2.277359 | 4.148681  | 0.229916  |
| 1  | 0 | -0.620048 | 4.802023  | 0.287753  |
| 1  | 0 | -1.546365 | 5.039404  | -2.038295 |
| 15 | 0 | 1.847107  | -1.155542 | -1.300916 |
| 8  | 0 | 3.185486  | -1.856341 | -0.685915 |
| 8  | 0 | 1.353573  | -2.290641 | -2.374550 |
| 8  | 0 | 2.449755  | -0.010833 | -2.278689 |
| 6  | 0 | 4.139131  | -2.358371 | -1.672761 |
| 6  | 0 | 2.337045  | -2.646495 | -3.397691 |
| 6  | 0 | 3.521268  | -0.444875 | -3.170043 |
| 6  | 0 | 3.683456  | -1.970965 | -3.088318 |
| 1  | 0 | 4.196676  | -3.444439 | -1.549176 |
| 1  | 0 | 5.108615  | -1.916038 | -1.426935 |
| 1  | 0 | 2.420404  | -3.736984 | -3.387037 |
| 1  | 0 | 1.937172  | -2.325722 | -4.364621 |
| 1  | 0 | 3.241427  | -0.120788 | -4.176251 |
| 1  | 0 | 4.433340  | 0.076395  | -2.863266 |
| 1  | 0 | 4.433427  | -2.300239 | -3.816414 |
| 45 | 0 | 0.210442  | -0.604482 | 0.036494  |
| 6  | 0 | -0.671637 | -3.418495 | 0.167531  |
| 1  | 0 | -0.374551 | -4.472348 | 0.259604  |
| 1  | 0 | -0.772933 | -3.217762 | -0.903898 |
| 6  | 0 | 0.359646  | -2.523808 | 0.887652  |
| 1  | 0 | 1.367222  | -2.935318 | 0.843689  |
| 6  | 0 | -0.155274 | -2.355337 | 2.340026  |
| 1  | 0 | -0.333252 | -1.304849 | 2.596638  |
| 1  | 0 | 0.585455  | -2.705471 | 3.066582  |
| 6  | 0 | -1.474272 | -3.156715 | 2.422667  |
| 1  | 0 | -2.200224 | -2.714807 | 3.112599  |
| 1  | 0 | -1.284760 | -4.181865 | 2.759426  |

|    |   |           |           |           |
|----|---|-----------|-----------|-----------|
| 5  | 0 | 0.974273  | -1.722971 | 0.352245  |
| 8  | 0 | 0.125471  | -2.129793 | 1.356159  |
| 8  | 0 | 2.278741  | -2.104151 | 0.573760  |
| 6  | 0 | 0.884769  | -2.948915 | 2.305998  |
| 6  | 0 | 2.383283  | -2.570136 | 1.959758  |
| 6  | 0 | 2.927765  | -1.402144 | 2.791889  |
| 1  | 0 | 2.266946  | -0.532841 | 2.755405  |
| 1  | 0 | 3.068023  | -1.695634 | 3.836593  |
| 1  | 0 | 3.896175  | -1.098253 | 2.387075  |
| 6  | 0 | 3.370221  | -3.735614 | 1.993520  |
| 1  | 0 | 3.434691  | -4.159194 | 3.001344  |
| 1  | 0 | 3.089876  | -4.529810 | 1.299273  |
| 1  | 0 | 4.366182  | -3.379061 | 1.714993  |
| 6  | 0 | 0.535310  | -4.416324 | 2.025331  |
| 1  | 0 | 1.013131  | -5.080976 | 2.751511  |
| 1  | 0 | -0.547485 | -4.546778 | 2.109664  |
| 1  | 0 | 0.839515  | -4.730148 | 1.023793  |
| 6  | 0 | 0.430868  | -2.574961 | 3.715924  |
| 1  | 0 | -0.620327 | -2.848806 | 3.844497  |
| 1  | 0 | 1.014919  | -3.115451 | 4.468330  |
| 1  | 0 | 0.525290  | -1.503749 | 3.901246  |
| 8  | 0 | -1.834305 | -0.430162 | -0.642872 |
| 6  | 0 | -2.393166 | -0.991290 | -1.615124 |
| 7  | 0 | -3.738536 | -1.045204 | -1.708188 |
| 1  | 0 | -4.095278 | -1.501108 | -2.538462 |
| 6  | 0 | -1.625188 | -1.703987 | -2.725930 |
| 1  | 0 | -2.133196 | -1.531519 | -3.681903 |
| 6  | 0 | -4.746461 | -0.578972 | -0.816047 |
| 6  | 0 | -6.068643 | -0.642313 | -1.282698 |
| 6  | 0 | -4.477142 | -0.102783 | 0.475039  |
| 6  | 0 | -7.120950 | -0.234800 | -0.465251 |
| 1  | 0 | -6.274934 | -1.010666 | -2.285324 |
| 6  | 0 | -5.545574 | 0.298809  | 1.282282  |
| 1  | 0 | -3.460881 | -0.048265 | 0.838759  |
| 6  | 0 | -6.863693 | 0.238069  | 0.824987  |
| 1  | 0 | -8.139341 | -0.289804 | -0.837144 |
| 1  | 0 | -5.337574 | 0.654893  | 2.287155  |
| 1  | 0 | -7.682090 | 0.550862  | 1.465741  |
| 15 | 0 | -0.288726 | 2.014992  | 0.498037  |
| 8  | 0 | 0.845308  | 2.881482  | 1.293953  |
| 8  | 0 | -1.006798 | 3.159008  | -0.424334 |
| 8  | 0 | -1.406404 | 1.773726  | 1.666526  |
| 6  | 0 | 0.353678  | 4.064061  | 1.995965  |
| 6  | 0 | -1.458025 | 4.354451  | 0.281337  |
| 6  | 0 | -1.884330 | 2.979343  | 2.337752  |
| 6  | 0 | -1.161096 | 4.217030  | 1.782793  |
| 1  | 0 | 0.902887  | 4.923967  | 1.600604  |
| 1  | 0 | 0.600101  | 3.936338  | 3.054453  |
| 1  | 0 | -0.932474 | 5.208113  | -0.157631 |
| 1  | 0 | -2.530473 | 4.456270  | 0.090019  |
| 1  | 0 | -2.964236 | 3.037588  | 2.169849  |

|    |   |           |           |           |
|----|---|-----------|-----------|-----------|
| 1  | 0 | -1.693423 | 2.847611  | 3.407162  |
| 1  | 0 | -1.513623 | 5.111256  | 2.309195  |
| 15 | 0 | 2.375627  | 0.728261  | -0.849519 |
| 8  | 0 | 3.409679  | 0.936320  | 0.387927  |
| 8  | 0 | 3.225585  | -0.217320 | -1.874634 |
| 8  | 0 | 2.461038  | 2.176143  | -1.608739 |
| 6  | 0 | 4.716256  | 1.481484  | 0.033379  |
| 6  | 0 | 4.599406  | 0.208903  | -2.124987 |
| 6  | 0 | 3.799488  | 2.587602  | -2.022358 |
| 6  | 0 | 4.842763  | 1.589561  | -1.494036 |
| 1  | 0 | 5.465264  | 0.803206  | 0.452381  |
| 1  | 0 | 4.805800  | 2.459202  | 0.517317  |
| 1  | 0 | 5.262490  | -0.551499 | -1.700527 |
| 1  | 0 | 4.728051  | 0.233492  | -3.210810 |
| 1  | 0 | 3.805455  | 2.636659  | -3.115862 |
| 1  | 0 | 3.962147  | 3.590829  | -1.617881 |
| 1  | 0 | 5.848370  | 1.938457  | -1.754742 |
| 45 | 0 | 0.282331  | 0.066383  | -0.545843 |
| 6  | 0 | -0.150333 | -1.284418 | -2.773816 |
| 1  | 0 | 0.297571  | -1.710597 | -3.679808 |
| 1  | 0 | -0.018399 | -0.197363 | -2.866311 |
| 6  | 0 | 0.518703  | -1.989884 | -1.532511 |
| 1  | 0 | 1.540996  | -2.253394 | -1.796948 |
| 6  | 0 | -0.385383 | -3.260764 | -1.328844 |
| 1  | 0 | -0.847988 | -3.270382 | -0.342519 |
| 1  | 0 | 0.219654  | -4.168901 | -1.407724 |
| 6  | 0 | -1.491238 | -3.214447 | -2.406566 |
| 1  | 0 | -2.421265 | -3.679918 | -2.065303 |
| 1  | 0 | -1.184843 | -3.726758 | -3.324902 |

TS7

|   |   |           |           |           |
|---|---|-----------|-----------|-----------|
| 5 | 0 | -2.340739 | -1.196396 | -0.622979 |
| 8 | 0 | -3.278552 | -0.547900 | -1.398089 |
| 8 | 0 | -2.872917 | -1.811155 | 0.481665  |
| 6 | 0 | -4.602618 | -0.948923 | -0.912062 |
| 6 | 0 | -4.292065 | -1.427133 | 0.564144  |
| 6 | 0 | -4.406734 | -0.307576 | 1.602591  |
| 1 | 0 | -3.819645 | 0.569947  | 1.323915  |
| 1 | 0 | -5.450530 | -0.010018 | 1.740382  |
| 1 | 0 | -4.025919 | -0.670980 | 2.560252  |
| 6 | 0 | -5.080329 | -2.651398 | 1.026072  |
| 1 | 0 | -6.153963 | -2.436099 | 1.039839  |
| 1 | 0 | -4.907379 | -3.517921 | 0.385141  |
| 1 | 0 | -4.778343 | -2.918608 | 2.042913  |
| 6 | 0 | -5.083648 | -2.077042 | -1.835016 |
| 1 | 0 | -6.095382 | -2.401658 | -1.574520 |
| 1 | 0 | -5.098010 | -1.712127 | -2.865850 |
| 1 | 0 | -4.427201 | -2.951936 | -1.790821 |
| 6 | 0 | -5.538395 | 0.251683  | -1.025194 |
| 1 | 0 | -5.659614 | 0.520743  | -2.078449 |
| 1 | 0 | -6.528069 | 0.011532  | -0.622477 |

|    |   |           |           |           |
|----|---|-----------|-----------|-----------|
| 1  | 0 | -5.146345 | 1.121932  | -0.496380 |
| 8  | 0 | 2.135253  | -0.443151 | -1.445903 |
| 6  | 0 | 2.349998  | -1.655777 | -1.550649 |
| 7  | 0 | 3.513004  | -2.253955 | -1.159136 |
| 1  | 0 | 3.581732  | -3.246496 | -1.339342 |
| 6  | 0 | 1.282240  | -2.596957 | -2.105872 |
| 1  | 0 | 1.738583  | -3.555548 | -2.374565 |
| 6  | 0 | 4.666630  | -1.681891 | -0.560742 |
| 6  | 0 | 5.763114  | -2.535695 | -0.357031 |
| 6  | 0 | 4.746511  | -0.336670 | -0.169154 |
| 6  | 0 | 6.930980  | -2.053822 | 0.231109  |
| 1  | 0 | 5.703523  | -3.577979 | -0.663529 |
| 6  | 0 | 5.926734  | 0.130614  | 0.416900  |
| 1  | 0 | 3.906117  | 0.323892  | -0.329596 |
| 6  | 0 | 7.019808  | -0.714164 | 0.621745  |
| 1  | 0 | 7.771195  | -2.725442 | 0.379159  |
| 1  | 0 | 5.986459  | 1.174067  | 0.713156  |
| 1  | 0 | 7.930441  | -0.335384 | 1.075214  |
| 15 | 0 | 0.032992  | 2.276842  | -0.572545 |
| 8  | 0 | -0.854182 | 3.270067  | 0.368950  |
| 8  | 0 | 1.545391  | 2.824071  | -0.323616 |
| 8  | 0 | -0.296060 | 2.834096  | -2.072580 |
| 6  | 0 | -0.632670 | 4.699450  | 0.147393  |
| 6  | 0 | 1.738523  | 4.255102  | -0.548612 |
| 6  | 0 | -0.090702 | 4.268977  | -2.268962 |
| 6  | 0 | 0.409759  | 4.908234  | -0.963582 |
| 1  | 0 | -0.297733 | 5.124082  | 1.098410  |
| 1  | 0 | -1.600341 | 5.133981  | -0.119937 |
| 1  | 0 | 2.121040  | 4.677628  | 0.385376  |
| 1  | 0 | 2.499313  | 4.357615  | -1.328076 |
| 1  | 0 | 0.636923  | 4.381170  | -3.077973 |
| 1  | 0 | -1.049772 | 4.689960  | -2.584593 |
| 1  | 0 | 0.563741  | 5.981911  | -1.120298 |
| 15 | 0 | -0.246963 | 0.011307  | 1.638612  |
| 8  | 0 | -1.451243 | 0.493313  | 2.620079  |
| 8  | 0 | 0.049671  | -1.508351 | 2.156852  |
| 8  | 0 | 1.027223  | 0.827023  | 2.250389  |
| 6  | 0 | -1.168557 | 0.402719  | 4.051440  |
| 6  | 0 | 0.185555  | -1.662300 | 3.604584  |
| 6  | 0 | 1.303312  | 0.585260  | 3.664889  |
| 6  | 0 | 0.189443  | -0.279931 | 4.276739  |
| 1  | 0 | -1.986807 | -0.169872 | 4.497632  |
| 1  | 0 | -1.181530 | 1.420923  | 4.452156  |
| 1  | 0 | -0.650785 | -2.278644 | 3.948579  |
| 1  | 0 | 1.123689  | -2.197394 | 3.776275  |
| 1  | 0 | 2.279174  | 0.094100  | 3.728161  |
| 1  | 0 | 1.362123  | 1.565462  | 4.146447  |
| 1  | 0 | 0.365885  | -0.397549 | 5.351933  |
| 45 | 0 | -0.419527 | 0.085098  | -0.547170 |
| 6  | 0 | 0.139378  | -2.827408 | -1.060505 |
| 1  | 0 | -0.187138 | -3.871039 | -1.105990 |

|   |   |           |           |           |
|---|---|-----------|-----------|-----------|
| 1 | 0 | 0.474628  | -2.655640 | -0.036041 |
| 6 | 0 | -1.037400 | -1.894662 | -1.500471 |
| 1 | 0 | -1.850344 | -2.569512 | -1.807011 |
| 6 | 0 | -0.595467 | -1.146994 | -2.778597 |
| 1 | 0 | -0.228969 | -0.096620 | -2.589569 |
| 1 | 0 | -1.420971 | -1.009006 | -3.479648 |
| 6 | 0 | 0.580921  | -1.969274 | -3.335518 |
| 1 | 0 | 1.261094  | -1.375203 | -3.950774 |
| 1 | 0 | 0.177468  | -2.770855 | -3.964823 |

TS8

|    |   |           |           |           |
|----|---|-----------|-----------|-----------|
| 45 | 0 | 0.341676  | 0.639037  | -0.624745 |
| 8  | 0 | -1.132763 | -1.193726 | -0.733509 |
| 6  | 0 | -1.667582 | -1.587557 | -1.784911 |
| 7  | 0 | -2.659725 | -2.512882 | -1.800463 |
| 1  | 0 | -2.984200 | -2.787671 | -2.717939 |
| 6  | 0 | -1.249875 | -1.028782 | -3.134123 |
| 1  | 0 | -1.743408 | -1.583561 | -3.937021 |
| 6  | 0 | 0.298393  | -1.072017 | -3.289066 |
| 1  | 0 | 0.774308  | -1.866209 | -2.708329 |
| 1  | 0 | 0.563275  | -1.240233 | -4.342104 |
| 6  | 0 | -1.605319 | 0.491719  | -3.210115 |
| 1  | 0 | -2.454570 | 0.772683  | -2.581313 |
| 1  | 0 | -1.866104 | 0.758394  | -4.243647 |
| 6  | 0 | -0.309243 | 1.193188  | -2.851474 |
| 6  | 0 | 0.753655  | 0.316299  | -2.902070 |
| 1  | 0 | 1.787396  | 0.613741  | -3.014628 |
| 1  | 0 | -0.202058 | 2.269289  | -2.921119 |
| 6  | 0 | -3.306602 | -3.178873 | -0.723011 |
| 6  | 0 | -4.132391 | -4.262954 | -1.058514 |
| 6  | 0 | -3.178287 | -2.781841 | 0.615456  |
| 6  | 0 | -4.828193 | -4.949480 | -0.065265 |
| 1  | 0 | -4.230091 | -4.570407 | -2.097419 |
| 6  | 0 | -3.883009 | -3.481855 | 1.598957  |
| 1  | 0 | -2.547294 | -1.943652 | 0.876011  |
| 6  | 0 | -4.705584 | -4.562097 | 1.272286  |
| 1  | 0 | -5.463991 | -5.785990 | -0.338340 |
| 1  | 0 | -3.790304 | -3.169901 | 2.635382  |
| 1  | 0 | -5.247009 | -5.094543 | 2.047856  |
| 15 | 0 | 0.357003  | 0.147361  | 1.590177  |
| 8  | 0 | 1.212070  | 1.088085  | 2.598606  |
| 8  | 0 | -1.119535 | 0.127275  | 2.292749  |
| 8  | 0 | 0.894113  | -1.352216 | 1.942304  |
| 6  | 0 | 1.273053  | 0.626127  | 3.980924  |
| 6  | 0 | -1.109821 | -0.121463 | 3.731140  |
| 6  | 0 | 0.759749  | -1.746448 | 3.341719  |
| 6  | 0 | 0.297473  | -0.545564 | 4.182932  |
| 1  | 0 | 1.010902  | 1.482967  | 4.607770  |
| 1  | 0 | 2.307328  | 0.331911  | 4.185538  |
| 1  | 0 | -1.431894 | 0.798974  | 4.228803  |
| 1  | 0 | -1.846125 | -0.908107 | 3.919027  |

|    |   |           |           |           |
|----|---|-----------|-----------|-----------|
| 1  | 0 | 0.041931  | -2.571898 | 3.385483  |
| 1  | 0 | 1.741844  | -2.106404 | 3.661646  |
| 1  | 0 | 0.274393  | -0.826479 | 5.241915  |
| 15 | 0 | -1.001680 | 2.538509  | -0.247526 |
| 8  | 0 | -0.570228 | 3.863738  | -1.133330 |
| 8  | 0 | -2.616256 | 2.470149  | -0.589400 |
| 8  | 0 | -1.025533 | 3.173919  | 1.266746  |
| 6  | 0 | -1.344289 | 5.077724  | -0.905744 |
| 6  | 0 | -3.376125 | 3.697619  | -0.385526 |
| 6  | 0 | -1.816102 | 4.382320  | 1.455315  |
| 6  | 0 | -2.451398 | 4.812885  | 0.125336  |
| 1  | 0 | -1.760653 | 5.383650  | -1.871051 |
| 1  | 0 | -0.648347 | 5.848093  | -0.558596 |
| 1  | 0 | -3.831984 | 3.964262  | -1.344763 |
| 1  | 0 | -4.169253 | 3.473638  | 0.334997  |
| 1  | 0 | -2.578703 | 4.158761  | 2.208585  |
| 1  | 0 | -1.142566 | 5.151824  | 1.845717  |
| 1  | 0 | -3.033624 | 5.728648  | 0.278671  |
| 5  | 0 | 2.702388  | 0.040656  | -0.545618 |
| 8  | 0 | 3.229100  | -0.617591 | -1.621568 |
| 8  | 0 | 3.429686  | -0.098898 | 0.598956  |
| 6  | 0 | 4.314447  | -1.478642 | -1.117772 |
| 6  | 0 | 4.687507  | -0.773280 | 0.243997  |
| 6  | 0 | 5.426419  | -1.505504 | -2.162194 |
| 6  | 0 | 3.710999  | -2.877494 | -0.942169 |
| 6  | 0 | 5.064170  | -1.720307 | 1.380214  |
| 6  | 0 | 5.741727  | 0.330429  | 0.098836  |
| 1  | 0 | 6.283704  | -2.079645 | -1.795223 |
| 1  | 0 | 5.063984  | -1.989241 | -3.073900 |
| 1  | 0 | 5.766141  | -0.501521 | -2.422186 |
| 1  | 0 | 3.311718  | -3.215614 | -1.902759 |
| 1  | 0 | 4.469069  | -3.597733 | -0.620263 |
| 1  | 0 | 2.896274  | -2.877791 | -0.212639 |
| 1  | 0 | 4.261013  | -2.424097 | 1.605842  |
| 1  | 0 | 5.965012  | -2.288492 | 1.125505  |
| 1  | 0 | 5.278155  | -1.140852 | 2.283075  |
| 1  | 0 | 6.729947  | -0.089150 | -0.111743 |
| 1  | 0 | 5.485100  | 1.031459  | -0.700470 |
| 1  | 0 | 5.799986  | 0.891997  | 1.035223  |
| 1  | 0 | 1.973729  | 1.130295  | -0.629883 |

TS9

|    |   |           |           |           |
|----|---|-----------|-----------|-----------|
| 45 | 0 | -0.255810 | -0.662169 | -0.680167 |
| 8  | 0 | 1.041190  | 1.200626  | -0.530171 |
| 6  | 0 | 1.348547  | 1.915972  | -1.503634 |
| 7  | 0 | 2.186952  | 2.971827  | -1.388926 |
| 1  | 0 | 2.353521  | 3.488021  | -2.242466 |
| 6  | 0 | 0.785258  | 1.642016  | -2.886755 |
| 1  | 0 | 1.188413  | 2.364214  | -3.602815 |
| 6  | 0 | -0.767848 | 1.692206  | -2.863005 |
| 1  | 0 | -1.167821 | 2.439669  | -2.176511 |

|    |   |           |           |           |
|----|---|-----------|-----------|-----------|
| 1  | 0 | -1.124656 | 1.938451  | -3.870638 |
| 6  | 0 | 1.089212  | 0.185448  | -3.327532 |
| 1  | 0 | 2.067955  | -0.172150 | -2.995392 |
| 1  | 0 | 1.081815  | 0.140918  | -4.425607 |
| 6  | 0 | -0.080835 | -0.628462 | -2.793487 |
| 6  | 0 | -1.216423 | 0.256180  | -2.542787 |
| 1  | 0 | -2.145960 | -0.076523 | -3.008546 |
| 1  | 0 | -0.243938 | -1.620017 | -3.206475 |
| 6  | 0 | 2.871517  | 3.482884  | -0.250911 |
| 6  | 0 | 3.640691  | 4.639534  | -0.453894 |
| 6  | 0 | 2.813616  | 2.890620  | 1.018989  |
| 6  | 0 | 4.350145  | 5.205416  | 0.603221  |
| 1  | 0 | 3.683757  | 5.098091  | -1.439583 |
| 6  | 0 | 3.532695  | 3.471787  | 2.067578  |
| 1  | 0 | 2.222546  | 2.000225  | 1.180302  |
| 6  | 0 | 4.299435  | 4.622397  | 1.872938  |
| 1  | 0 | 4.940648  | 6.100313  | 0.432890  |
| 1  | 0 | 3.489923  | 3.011626  | 3.050484  |
| 1  | 0 | 4.851330  | 5.060931  | 2.698330  |
| 15 | 0 | -0.613059 | -0.584306 | 1.656104  |
| 8  | 0 | -1.011799 | -2.009921 | 2.350823  |
| 8  | 0 | 0.747128  | -0.168128 | 2.474055  |
| 8  | 0 | -1.710934 | 0.423522  | 2.345178  |
| 6  | 0 | -1.085712 | -2.015090 | 3.805821  |
| 6  | 0 | 0.657365  | -0.211210 | 3.927367  |
| 6  | 0 | -1.769937 | 0.399009  | 3.802831  |
| 6  | 0 | -0.760351 | -0.617522 | 4.357357  |
| 1  | 0 | -0.371571 | -2.763613 | 4.163205  |
| 1  | 0 | -2.098167 | -2.328888 | 4.078791  |
| 1  | 0 | 1.404648  | -0.929973 | 4.278792  |
| 1  | 0 | 0.916406  | 0.785227  | 4.299206  |
| 1  | 0 | -1.554017 | 1.413410  | 4.152693  |
| 1  | 0 | -2.795596 | 0.135531  | 4.081142  |
| 1  | 0 | -0.820732 | -0.632737 | 5.451460  |
| 15 | 0 | 1.473761  | -2.185222 | -0.571131 |
| 8  | 0 | 1.291717  | -3.455304 | -1.588534 |
| 8  | 0 | 2.954135  | -1.631756 | -1.009941 |
| 8  | 0 | 1.800695  | -2.934159 | 0.843691  |
| 6  | 0 | 2.386128  | -4.421138 | -1.601178 |
| 6  | 0 | 4.029886  | -2.620307 | -0.992018 |
| 6  | 0 | 2.870339  | -3.926338 | 0.809393  |
| 6  | 0 | 3.474477  | -3.999600 | -0.601104 |
| 1  | 0 | 2.772488  | -4.459377 | -2.624414 |
| 1  | 0 | 1.959086  | -5.394956 | -1.343745 |
| 1  | 0 | 4.470268  | -2.634056 | -1.993715 |
| 1  | 0 | 4.779624  | -2.270352 | -0.275816 |
| 1  | 0 | 3.615577  | -3.620828 | 1.550231  |
| 1  | 0 | 2.434678  | -4.883751 | 1.111343  |
| 1  | 0 | 4.286300  | -4.735574 | -0.613249 |
| 5  | 0 | -2.339897 | 0.246775  | -1.011331 |
| 8  | 0 | -2.684118 | 1.489431  | -0.563511 |



|   |   |           |           |           |
|---|---|-----------|-----------|-----------|
| 8 | 0 | -3.395638 | -0.627335 | -1.072385 |
| 6 | 0 | -4.150828 | 1.553558  | -0.473495 |
| 6 | 0 | -4.570897 | 0.021218  | -0.481284 |
| 6 | 0 | -4.622576 | 2.332631  | -1.707293 |
| 6 | 0 | -4.513273 | 2.317495  | 0.797403  |
| 6 | 0 | -4.765990 | -0.583091 | 0.913757  |
| 6 | 0 | -5.777190 | -0.312929 | -1.359060 |
| 1 | 0 | -5.708372 | 2.465099  | -1.702785 |
| 1 | 0 | -4.159709 | 3.323569  | -1.701397 |
| 1 | 0 | -4.344917 | 1.832099  | -2.639639 |
| 1 | 0 | -4.158092 | 3.349025  | 0.717854  |
| 1 | 0 | -5.599205 | 2.343767  | 0.936114  |
| 1 | 0 | -4.052806 | 1.868026  | 1.677765  |
| 1 | 0 | -3.914284 | -0.374982 | 1.563305  |
| 1 | 0 | -5.673547 | -0.195125 | 1.386649  |
| 1 | 0 | -4.868720 | -1.667572 | 0.815808  |
| 1 | 0 | -6.678691 | 0.183284  | -0.984500 |
| 1 | 0 | -5.625737 | -0.018678 | -2.399423 |
| 1 | 0 | -5.952985 | -1.392071 | -1.335991 |
| 1 | 0 | -1.131425 | -1.918322 | -0.760562 |

TS10

|    |   |           |           |           |
|----|---|-----------|-----------|-----------|
| 45 | 0 | -0.787009 | 0.537311  | -0.348869 |
| 8  | 0 | 1.248883  | -0.796523 | -0.860867 |
| 6  | 0 | 1.774142  | -0.907601 | -1.977903 |
| 7  | 0 | 2.827875  | -1.737422 | -2.214568 |
| 1  | 0 | 3.168021  | -1.751220 | -3.166939 |
| 6  | 0 | 1.315332  | -0.093691 | -3.185916 |
| 1  | 0 | 1.636467  | -0.609360 | -4.098019 |
| 6  | 0 | 1.889266  | 1.350408  | -3.163501 |
| 1  | 0 | 2.900477  | 1.395821  | -2.746083 |
| 1  | 0 | 1.960662  | 1.706131  | -4.196130 |
| 6  | 0 | -0.208185 | 0.132434  | -3.209219 |
| 1  | 0 | -0.770951 | -0.748422 | -2.895754 |
| 1  | 0 | -0.501018 | 0.344116  | -4.246327 |
| 6  | 0 | -0.471080 | 1.415349  | -2.371654 |
| 1  | 0 | -1.284657 | 1.972377  | -2.838506 |
| 6  | 0 | 3.546048  | -2.579673 | -1.324094 |
| 6  | 0 | 4.621226  | -3.298900 | -1.871290 |
| 6  | 0 | 3.232360  | -2.718336 | 0.036509  |
| 6  | 0 | 5.381166  | -4.148367 | -1.070151 |
| 1  | 0 | 4.864094  | -3.192517 | -2.926489 |
| 6  | 0 | 4.006603  | -3.574705 | 0.825466  |
| 1  | 0 | 2.403611  | -2.170468 | 0.462503  |
| 6  | 0 | 5.077613  | -4.290682 | 0.287232  |
| 1  | 0 | 6.209185  | -4.697361 | -1.508045 |
| 1  | 0 | 3.763110  | -3.679881 | 1.878926  |
| 1  | 0 | 5.668279  | -4.951308 | 0.914049  |
| 15 | 0 | -0.920239 | -0.535616 | 1.771227  |
| 8  | 0 | -1.297376 | 0.445925  | 3.030355  |
| 8  | 0 | -2.004809 | -1.747648 | 1.956618  |

|    |   |           |           |           |
|----|---|-----------|-----------|-----------|
| 8  | 0 | 0.453848  | -1.245169 | 2.316504  |
| 6  | 0 | -1.405547 | -0.203252 | 4.333709  |
| 6  | 0 | -2.035586 | -2.385716 | 3.267003  |
| 6  | 0 | 0.379571  | -1.832662 | 3.650231  |
| 6  | 0 | -1.043611 | -1.692238 | 4.213321  |
| 1  | 0 | -2.434015 | -0.064868 | 4.681258  |
| 1  | 0 | -0.725777 | 0.322101  | 5.011780  |
| 1  | 0 | -3.062629 | -2.310089 | 3.637350  |
| 1  | 0 | -1.782812 | -3.440753 | 3.122179  |
| 1  | 0 | 0.669824  | -2.883351 | 3.554452  |
| 1  | 0 | 1.113030  | -1.315144 | 4.277104  |
| 1  | 0 | -1.092688 | -2.161274 | 5.202506  |
| 15 | 0 | -2.803962 | -0.147619 | -0.850357 |
| 8  | 0 | -3.460877 | 0.568801  | -2.170182 |
| 8  | 0 | -2.960917 | -1.728512 | -1.234468 |
| 8  | 0 | -3.980389 | 0.065679  | 0.258722  |
| 6  | 0 | -4.789575 | 0.091244  | -2.546599 |
| 6  | 0 | -4.310151 | -2.172601 | -1.570500 |
| 6  | 0 | -5.314703 | -0.376650 | -0.136836 |
| 6  | 0 | -5.273144 | -0.975764 | -1.550840 |
| 1  | 0 | -4.714575 | -0.311312 | -3.561495 |
| 1  | 0 | -5.451068 | 0.962576  | -2.554954 |
| 1  | 0 | -4.258081 | -2.633373 | -2.561488 |
| 1  | 0 | -4.595736 | -2.932807 | -0.836864 |
| 1  | 0 | -5.641338 | -1.114039 | 0.602600  |
| 1  | 0 | -5.970792 | 0.497626  | -0.086729 |
| 1  | 0 | -6.277598 | -1.309054 | -1.835614 |
| 5  | 0 | 1.388330  | 2.641223  | -0.956657 |
| 8  | 0 | 2.262827  | 3.655911  | -0.731420 |
| 8  | 0 | 0.991964  | 1.998910  | 0.207824  |
| 6  | 0 | 2.656259  | 3.616506  | 0.679111  |
| 6  | 0 | 1.456014  | 2.839575  | 1.348255  |
| 6  | 0 | 2.836890  | 5.051800  | 1.166036  |
| 6  | 0 | 3.988775  | 2.859114  | 0.740295  |
| 6  | 0 | 1.865757  | 1.945938  | 2.511354  |
| 6  | 0 | 0.276371  | 3.733825  | 1.737205  |
| 1  | 0 | 3.062165  | 5.072746  | 2.237461  |
| 1  | 0 | 3.675653  | 5.511631  | 0.636215  |
| 1  | 0 | 1.948415  | 5.658539  | 0.982797  |
| 1  | 0 | 4.707094  | 3.359859  | 0.085519  |
| 1  | 0 | 4.399498  | 2.852456  | 1.753917  |
| 1  | 0 | 3.883394  | 1.823452  | 0.403937  |
| 1  | 0 | 2.533038  | 1.144105  | 2.192254  |
| 1  | 0 | 2.375947  | 2.546924  | 3.271804  |
| 1  | 0 | 0.981591  | 1.503726  | 2.972796  |
| 1  | 0 | 0.528007  | 4.352553  | 2.603538  |
| 1  | 0 | -0.020036 | 4.394778  | 0.917632  |
| 1  | 0 | -0.579150 | 3.106969  | 2.002632  |
| 1  | 0 | -1.313164 | 1.813722  | -1.095039 |
| 6  | 0 | 0.854161  | 2.224609  | -2.373409 |
| 1  | 0 | 0.705097  | 3.160994  | -2.926995 |

TS11

|    |   |           |           |           |
|----|---|-----------|-----------|-----------|
| 5  | 0 | 0.776655  | -0.521212 | 1.126047  |
| 8  | 0 | -0.179516 | -1.335371 | 1.650524  |
| 8  | 0 | 1.664372  | -0.021666 | 2.029428  |
| 6  | 0 | 0.180039  | -1.573110 | 3.065859  |
| 6  | 0 | 1.156589  | -0.364853 | 3.371263  |
| 6  | 0 | 0.446905  | 0.885368  | 3.901090  |
| 1  | 0 | -0.386610 | 1.182540  | 3.259888  |
| 1  | 0 | 0.073221  | 0.725326  | 4.916765  |
| 1  | 0 | 1.163198  | 1.711533  | 3.927154  |
| 6  | 0 | 2.353036  | -0.708260 | 4.253974  |
| 1  | 0 | 2.020997  | -1.015422 | 5.251351  |
| 1  | 0 | 2.959297  | -1.509380 | 3.827267  |
| 1  | 0 | 2.986355  | 0.176045  | 4.368046  |
| 6  | 0 | 0.859968  | -2.945444 | 3.111197  |
| 1  | 0 | 1.126047  | -3.221234 | 4.136084  |
| 1  | 0 | 0.167289  | -3.699525 | 2.727052  |
| 1  | 0 | 1.765331  | -2.969772 | 2.497934  |
| 6  | 0 | -1.107966 | -1.585934 | 3.882587  |
| 1  | 0 | -1.723269 | -2.440645 | 3.587685  |
| 1  | 0 | -0.883528 | -1.686010 | 4.949861  |
| 1  | 0 | -1.693507 | -0.677819 | 3.730981  |
| 8  | 0 | -2.709679 | 0.004518  | -0.608335 |
| 6  | 0 | -3.118256 | -0.995142 | -1.202780 |
| 7  | 0 | -4.427712 | -1.372064 | -1.268294 |
| 1  | 0 | -4.619411 | -2.205437 | -1.808184 |
| 6  | 0 | -2.131809 | -1.951524 | -1.884284 |
| 1  | 0 | -2.624254 | -2.506691 | -2.691552 |
| 6  | 0 | -5.571395 | -0.778729 | -0.672496 |
| 6  | 0 | -6.807886 | -1.397452 | -0.918019 |
| 6  | 0 | -5.512572 | 0.368367  | 0.132819  |
| 6  | 0 | -7.976413 | -0.878297 | -0.363977 |
| 1  | 0 | -6.855451 | -2.286571 | -1.543377 |
| 6  | 0 | -6.693943 | 0.875951  | 0.681302  |
| 1  | 0 | -4.560608 | 0.844602  | 0.319976  |
| 6  | 0 | -7.925803 | 0.263715  | 0.441175  |
| 1  | 0 | -8.925084 | -1.367714 | -0.562587 |
| 1  | 0 | -6.643520 | 1.763727  | 1.305240  |
| 1  | 0 | -8.834977 | 0.669316  | 0.873760  |
| 15 | 0 | 0.484085  | 2.212096  | -0.324878 |
| 8  | 0 | 1.827761  | 3.121557  | -0.125530 |
| 8  | 0 | -0.239192 | 2.968782  | -1.588071 |
| 8  | 0 | -0.440859 | 2.696224  | 0.934455  |
| 6  | 0 | 1.599652  | 4.556287  | 0.024088  |
| 6  | 0 | -0.436954 | 4.407716  | -1.439805 |
| 6  | 0 | -0.653539 | 4.136149  | 1.048658  |
| 6  | 0 | 0.097313  | 4.869942  | -0.074451 |
| 1  | 0 | 2.166785  | 5.055776  | -0.767244 |
| 1  | 0 | 2.007697  | 4.848152  | 0.996681  |
| 1  | 0 | 0.091479  | 4.895275  | -2.264834 |

|    |   |           |           |           |
|----|---|-----------|-----------|-----------|
| 1  | 0 | -1.510037 | 4.597217  | -1.538463 |
| 1  | 0 | -1.732568 | 4.308639  | 0.992202  |
| 1  | 0 | -0.291998 | 4.438447  | 2.036342  |
| 1  | 0 | -0.056171 | 5.949910  | 0.030575  |
| 15 | 0 | 2.845759  | -0.607029 | -0.846207 |
| 8  | 0 | 3.326374  | -2.016428 | -0.176246 |
| 8  | 0 | 3.432461  | -0.749083 | -2.366932 |
| 8  | 0 | 3.859019  | 0.472417  | -0.186794 |
| 6  | 0 | 4.744642  | -2.335372 | -0.352892 |
| 6  | 0 | 4.878366  | -0.963360 | -2.455387 |
| 6  | 0 | 5.274222  | 0.113285  | -0.223118 |
| 6  | 0 | 5.464855  | -1.168875 | -1.048644 |
| 1  | 0 | 4.798655  | -3.255178 | -0.943164 |
| 1  | 0 | 5.153221  | -2.522454 | 0.644027  |
| 1  | 0 | 5.025393  | -1.843017 | -3.088099 |
| 1  | 0 | 5.310388  | -0.087752 | -2.949075 |
| 1  | 0 | 5.801765  | 0.962792  | -0.665474 |
| 1  | 0 | 5.604010  | -0.016897 | 0.812175  |
| 1  | 0 | 6.533506  | -1.397783 | -1.129462 |
| 45 | 0 | 0.703608  | -0.119253 | -0.875513 |
| 1  | 0 | -0.999896 | -0.117450 | -2.085949 |
| 6  | 0 | 0.340232  | -1.877897 | -1.990030 |
| 1  | 0 | 1.134187  | -1.981102 | -2.731184 |
| 6  | 0 | -0.073243 | -3.175919 | -1.303614 |
| 1  | 0 | 0.588245  | -3.464261 | -0.482085 |
| 1  | 0 | -0.029682 | -3.985649 | -2.047804 |
| 6  | 0 | -1.524338 | -2.941889 | -0.844000 |
| 1  | 0 | -1.521775 | -2.476993 | 0.144198  |
| 1  | 0 | -2.102328 | -3.868545 | -0.782719 |
| 6  | 0 | -0.920209 | -1.185632 | -2.471345 |
| 1  | 0 | -0.956585 | -1.047251 | -3.556852 |

TS12

|   |   |           |           |          |
|---|---|-----------|-----------|----------|
| 5 | 0 | 0.141566  | -0.309579 | 0.898054 |
| 8 | 0 | -1.024363 | -0.974512 | 1.131377 |
| 8 | 0 | 0.806476  | 0.078423  | 2.022760 |
| 6 | 0 | -1.081032 | -1.253544 | 2.583491 |
| 6 | 0 | -0.089317 | -0.169730 | 3.167464 |
| 6 | 0 | -0.762164 | 1.166820  | 3.495969 |
| 1 | 0 | -1.349062 | 1.542985  | 2.654443 |
| 1 | 0 | -1.415140 | 1.074336  | 4.368850 |
| 1 | 0 | 0.012242  | 1.904047  | 3.725642 |
| 6 | 0 | 0.763220  | -0.638811 | 4.342376 |
| 1 | 0 | 0.130980  | -0.887424 | 5.201389 |
| 1 | 0 | 1.365322  | -1.512692 | 4.087238 |
| 1 | 0 | 1.440803  | 0.164715  | 4.644514 |
| 6 | 0 | -0.594749 | -2.695302 | 2.768200 |
| 1 | 0 | -0.642288 | -2.996745 | 3.818837 |
| 1 | 0 | -1.241252 | -3.367660 | 2.196815 |
| 1 | 0 | 0.432097  | -2.825227 | 2.414407 |
| 6 | 0 | -2.531548 | -1.114485 | 3.033600 |

|    |   |           |           |           |
|----|---|-----------|-----------|-----------|
| 1  | 0 | -3.141575 | -1.890183 | 2.562162  |
| 1  | 0 | -2.608961 | -1.241326 | 4.118685  |
| 1  | 0 | -2.950426 | -0.144027 | 2.763511  |
| 8  | 0 | -2.758127 | 0.672115  | -1.487682 |
| 6  | 0 | -2.991981 | -0.526734 | -1.623351 |
| 7  | 0 | -4.170549 | -1.128299 | -1.284826 |
| 1  | 0 | -4.222844 | -2.124644 | -1.450427 |
| 6  | 0 | -1.960232 | -1.480749 | -2.245520 |
| 1  | 0 | -2.372271 | -1.783911 | -3.221836 |
| 6  | 0 | -5.348518 | -0.561810 | -0.732318 |
| 6  | 0 | -6.411476 | -1.441260 | -0.468573 |
| 6  | 0 | -5.490286 | 0.806095  | -0.454726 |
| 6  | 0 | -7.605763 | -0.961809 | 0.066308  |
| 1  | 0 | -6.305311 | -2.501897 | -0.687427 |
| 6  | 0 | -6.695024 | 1.270729  | 0.081231  |
| 1  | 0 | -4.674436 | 1.484459  | -0.660281 |
| 6  | 0 | -7.754510 | 0.400213  | 0.345511  |
| 1  | 0 | -8.419496 | -1.653777 | 0.261524  |
| 1  | 0 | -6.800842 | 2.331434  | 0.290013  |
| 1  | 0 | -8.684905 | 0.776032  | 0.759444  |
| 6  | 0 | 0.426592  | -1.748196 | -2.329166 |
| 1  | 0 | 1.332076  | -1.743715 | -2.932310 |
| 45 | 0 | 0.866066  | 0.005993  | -0.977916 |
| 1  | 0 | -0.625687 | 0.476156  | -1.433222 |
| 6  | 0 | -0.623398 | -0.839000 | -2.568762 |
| 1  | 0 | -0.575150 | -0.083416 | -3.349117 |
| 15 | 0 | 1.098734  | 2.197465  | -0.375586 |
| 8  | 0 | 1.149738  | 3.069454  | -1.759817 |
| 8  | 0 | -0.084022 | 2.946223  | 0.459569  |
| 8  | 0 | 2.443391  | 2.708935  | 0.389505  |
| 6  | 0 | 1.331794  | 4.510216  | -1.588553 |
| 6  | 0 | 0.048420  | 4.397283  | 0.569770  |
| 6  | 0 | 2.546027  | 4.153341  | 0.580895  |
| 6  | 0 | 1.357530  | 4.859611  | -0.091451 |
| 1  | 0 | 0.498949  | 4.997896  | -2.103247 |
| 1  | 0 | 2.269494  | 4.782272  | -2.082631 |
| 1  | 0 | -0.827673 | 4.838115  | 0.084786  |
| 1  | 0 | 0.030237  | 4.639976  | 1.636344  |
| 1  | 0 | 2.567412  | 4.337716  | 1.659447  |
| 1  | 0 | 3.499718  | 4.464622  | 0.144822  |
| 1  | 0 | 1.461863  | 5.944016  | 0.027473  |
| 15 | 0 | 2.935762  | -0.977229 | -0.381882 |
| 8  | 0 | 2.843135  | -2.402110 | 0.428172  |
| 8  | 0 | 3.819501  | -1.414431 | -1.695741 |
| 8  | 0 | 4.032724  | -0.153711 | 0.496931  |
| 6  | 0 | 4.117385  | -3.080236 | 0.657757  |
| 6  | 0 | 5.106232  | -2.045981 | -1.410998 |
| 6  | 0 | 5.274297  | -0.858439 | 0.795020  |
| 6  | 0 | 5.275719  | -2.232458 | 0.106330  |
| 1  | 0 | 4.059918  | -4.054692 | 0.162705  |
| 1  | 0 | 4.211640  | -3.231878 | 1.737175  |

|   |   |           |           |           |
|---|---|-----------|-----------|-----------|
| 1 | 0 | 5.114600  | -3.004388 | -1.938569 |
| 1 | 0 | 5.887066  | -1.401628 | -1.826461 |
| 1 | 0 | 6.093312  | -0.227245 | 0.437879  |
| 1 | 0 | 5.341807  | -0.952525 | 1.883283  |
| 1 | 0 | 6.225241  | -2.741570 | 0.306488  |
| 6 | 0 | -1.592617 | -2.751176 | -1.421420 |
| 1 | 0 | -2.248831 | -3.595984 | -1.650971 |
| 1 | 0 | -1.678692 | -2.524910 | -0.359193 |
| 6 | 0 | -0.117461 | -3.060389 | -1.782874 |
| 1 | 0 | 0.452294  | -3.451524 | -0.935303 |
| 1 | 0 | -0.057121 | -3.811282 | -2.582956 |

TS13

|   |   |           |           |           |
|---|---|-----------|-----------|-----------|
| 5 | 0 | -2.269375 | 0.823105  | -0.173039 |
| 8 | 0 | -2.899727 | 0.830931  | -1.392294 |
| 8 | 0 | -3.130245 | 0.997749  | 0.880163  |
| 6 | 0 | -4.347685 | 0.796103  | -1.147652 |
| 6 | 0 | -4.450028 | 1.337958  | 0.332620  |
| 6 | 0 | -4.588085 | 2.862208  | 0.423523  |
| 1 | 0 | -3.832272 | 3.374194  | -0.178716 |
| 1 | 0 | -5.575788 | 3.194088  | 0.089554  |
| 1 | 0 | -4.458334 | 3.169302  | 1.465218  |
| 6 | 0 | -5.512817 | 0.664905  | 1.198067  |
| 1 | 0 | -6.513706 | 0.841577  | 0.789783  |
| 1 | 0 | -5.352548 | -0.412374 | 1.272986  |
| 1 | 0 | -5.482628 | 1.085671  | 2.207557  |
| 6 | 0 | -4.785518 | -0.666332 | -1.296496 |
| 1 | 0 | -5.867200 | -0.773584 | -1.169583 |
| 1 | 0 | -4.524467 | -1.012263 | -2.300816 |
| 1 | 0 | -4.280137 | -1.313496 | -0.574558 |
| 6 | 0 | -5.031531 | 1.660054  | -2.204581 |
| 1 | 0 | -4.871826 | 1.222048  | -3.194276 |
| 1 | 0 | -6.111486 | 1.707270  | -2.027638 |
| 1 | 0 | -4.636148 | 2.677358  | -2.218790 |
| 8 | 0 | 2.079391  | 0.878196  | -0.077292 |
| 6 | 0 | 2.659686  | 1.966697  | -0.269040 |
| 7 | 0 | 4.012195  | 2.059748  | -0.289566 |
| 1 | 0 | 4.377465  | 2.988752  | -0.454618 |
| 6 | 0 | 1.906730  | 3.275497  | -0.458827 |
| 1 | 0 | 2.550140  | 3.980654  | -0.997346 |
| 6 | 0 | 5.008940  | 1.066420  | -0.084633 |
| 6 | 0 | 6.342580  | 1.505545  | -0.109746 |
| 6 | 0 | 4.722621  | -0.290429 | 0.127955  |
| 6 | 0 | 7.384671  | 0.600111  | 0.078264  |
| 1 | 0 | 6.565150  | 2.557558  | -0.274874 |
| 6 | 0 | 5.780462  | -1.185101 | 0.315534  |
| 1 | 0 | 3.698531  | -0.634381 | 0.144747  |
| 6 | 0 | 7.108269  | -0.753553 | 0.293163  |
| 1 | 0 | 8.410708  | 0.954363  | 0.057695  |
| 1 | 0 | 5.554968  | -2.234539 | 0.481950  |
| 1 | 0 | 7.918544  | -1.460490 | 0.441208  |

|    |   |           |           |           |
|----|---|-----------|-----------|-----------|
| 15 | 0 | -0.464601 | -1.011137 | 1.624165  |
| 8  | 0 | -1.758208 | -1.989185 | 1.653486  |
| 8  | 0 | 0.752151  | -2.036161 | 1.979658  |
| 8  | 0 | -0.601520 | -0.161596 | 3.003796  |
| 6  | 0 | -1.866477 | -2.829475 | 2.848693  |
| 6  | 0 | 0.610430  | -2.742178 | 3.255907  |
| 6  | 0 | -0.879717 | -0.957395 | 4.200636  |
| 6  | 0 | -0.772518 | -2.452857 | 3.862047  |
| 1  | 0 | -1.776000 | -3.870066 | 2.522804  |
| 1  | 0 | -2.867851 | -2.662491 | 3.254224  |
| 1  | 0 | 0.743688  | -3.805518 | 3.038869  |
| 1  | 0 | 1.419460  | -2.403186 | 3.909884  |
| 1  | 0 | -0.144955 | -0.657293 | 4.952384  |
| 1  | 0 | -1.882766 | -0.687625 | 4.544080  |
| 1  | 0 | -0.903865 | -3.044633 | 4.775068  |
| 15 | 0 | -0.057298 | -1.186344 | -1.391600 |
| 8  | 0 | -1.310072 | -2.190493 | -1.614086 |
| 8  | 0 | 0.129309  | -0.486581 | -2.846806 |
| 8  | 0 | 1.208307  | -2.209016 | -1.336071 |
| 6  | 0 | -1.151697 | -3.128027 | -2.729741 |
| 6  | 0 | 0.187420  | -1.410065 | -3.981731 |
| 6  | 0 | 1.351890  | -3.075268 | -2.509708 |
| 6  | 0 | 0.170030  | -2.858239 | -3.468587 |
| 1  | 0 | -2.016385 | -2.984125 | -3.383219 |
| 1  | 0 | -1.180881 | -4.136691 | -2.307355 |
| 1  | 0 | -0.674589 | -1.192092 | -4.618881 |
| 1  | 0 | 1.108142  | -1.183225 | -4.526176 |
| 1  | 0 | 2.307370  | -2.826962 | -2.981013 |
| 1  | 0 | 1.388811  | -4.102743 | -2.137221 |
| 1  | 0 | 0.257136  | -3.546379 | -4.317167 |
| 45 | 0 | -0.230522 | 0.488434  | 0.028780  |
| 6  | 0 | 0.563775  | 3.070681  | -1.187317 |
| 1  | 0 | 0.250216  | 4.039933  | -1.598030 |
| 1  | 0 | 0.646910  | 2.388868  | -2.040069 |
| 6  | 0 | -0.441885 | 2.621863  | -0.087851 |
| 1  | 0 | -1.416965 | 3.070643  | -0.265432 |
| 6  | 0 | 0.160902  | 3.109432  | 1.272959  |
| 1  | 0 | 0.388984  | 2.293054  | 1.969770  |
| 1  | 0 | -0.549546 | 3.752309  | 1.803175  |
| 6  | 0 | 1.462101  | 3.863117  | 0.910442  |
| 1  | 0 | 2.232699  | 3.786328  | 1.684638  |
| 1  | 0 | 1.254496  | 4.928314  | 0.760947  |

#### TS14

|   |   |          |           |           |
|---|---|----------|-----------|-----------|
| 5 | 0 | 2.065895 | 0.453081  | -0.862853 |
| 8 | 0 | 2.537163 | 0.481001  | -2.152293 |
| 8 | 0 | 2.971831 | 0.897944  | 0.058427  |
| 6 | 0 | 3.808460 | 1.223572  | -2.141221 |
| 6 | 0 | 4.255512 | 1.090619  | -0.631268 |
| 6 | 0 | 5.098907 | -0.157542 | -0.346451 |
| 1 | 0 | 4.620367 | -1.063816 | -0.727243 |

|    |   |           |           |           |
|----|---|-----------|-----------|-----------|
| 1  | 0 | 6.095701  | -0.073565 | -0.789845 |
| 1  | 0 | 5.214372  | -0.265120 | 0.735870  |
| 6  | 0 | 4.929979  | 2.328153  | -0.045145 |
| 1  | 0 | 5.866432  | 2.543998  | -0.570648 |
| 1  | 0 | 4.286292  | 3.207606  | -0.104197 |
| 1  | 0 | 5.167746  | 2.150220  | 1.007632  |
| 6  | 0 | 3.473792  | 2.659845  | -2.560289 |
| 1  | 0 | 4.375124  | 3.276914  | -2.623569 |
| 1  | 0 | 3.005314  | 2.641409  | -3.548590 |
| 1  | 0 | 2.775345  | 3.128860  | -1.861601 |
| 6  | 0 | 4.747887  | 0.578867  | -3.156436 |
| 1  | 0 | 4.336508  | 0.695583  | -4.163319 |
| 1  | 0 | 5.729038  | 1.065213  | -3.136723 |
| 1  | 0 | 4.885116  | -0.487496 | -2.966954 |
| 8  | 0 | -2.145594 | -0.761341 | -0.441367 |
| 6  | 0 | -2.637007 | -0.715901 | -1.582770 |
| 7  | 0 | -3.939317 | -0.435140 | -1.825790 |
| 1  | 0 | -4.212864 | -0.432936 | -2.799721 |
| 6  | 0 | -1.796130 | -1.086374 | -2.806136 |
| 1  | 0 | -2.225855 | -0.658438 | -3.717336 |
| 6  | 0 | -5.002989 | -0.171934 | -0.917433 |
| 6  | 0 | -6.253162 | 0.120749  | -1.484492 |
| 6  | 0 | -4.854108 | -0.204547 | 0.476219  |
| 6  | 0 | -7.351142 | 0.379622  | -0.666248 |
| 1  | 0 | -6.368327 | 0.144555  | -2.566129 |
| 6  | 0 | -5.965956 | 0.056005  | 1.282232  |
| 1  | 0 | -3.891118 | -0.425556 | 0.913287  |
| 6  | 0 | -7.212625 | 0.348056  | 0.724616  |
| 1  | 0 | -8.313094 | 0.602897  | -1.117240 |
| 1  | 0 | -5.849718 | 0.024722  | 2.361719  |
| 1  | 0 | -8.067301 | 0.545639  | 1.363901  |
| 15 | 0 | 1.021040  | -1.701695 | 1.133449  |
| 8  | 0 | 1.449699  | -1.162269 | 2.611039  |
| 8  | 0 | -0.025887 | -2.908093 | 1.508176  |
| 8  | 0 | 2.346667  | -2.560962 | 0.685763  |
| 6  | 0 | 1.960435  | -2.167279 | 3.534996  |
| 6  | 0 | 0.451566  | -3.879014 | 2.487941  |
| 6  | 0 | 2.794571  | -3.575095 | 1.634757  |
| 6  | 0 | 1.902033  | -3.558674 | 2.885653  |
| 1  | 0 | 1.342277  | -2.117181 | 4.436507  |
| 1  | 0 | 2.986880  | -1.884369 | 3.788930  |
| 1  | 0 | -0.221576 | -3.831568 | 3.349594  |
| 1  | 0 | 0.370973  | -4.867588 | 2.025519  |
| 1  | 0 | 2.750830  | -4.541483 | 1.122616  |
| 1  | 0 | 3.835940  | -3.348134 | 1.882671  |
| 1  | 0 | 2.259186  | -4.310885 | 3.598095  |
| 15 | 0 | -0.173679 | 1.694831  | 0.787978  |
| 8  | 0 | 0.472093  | 3.077980  | 0.191487  |
| 8  | 0 | -1.755380 | 2.100658  | 0.900739  |
| 8  | 0 | 0.295399  | 1.739571  | 2.348009  |
| 6  | 0 | 0.151391  | 4.293936  | 0.932146  |



|    |   |           |           |           |
|----|---|-----------|-----------|-----------|
| 6  | 0 | -2.041570 | 3.311999  | 1.662789  |
| 6  | 0 | 0.015373  | 2.979419  | 3.062784  |
| 6  | 0 | -0.732088 | 3.958313  | 2.144000  |
| 1  | 0 | -0.357759 | 4.970228  | 0.238383  |
| 1  | 0 | 1.099786  | 4.744349  | 1.240915  |
| 1  | 0 | -2.600860 | 3.981329  | 1.002063  |
| 1  | 0 | -2.680592 | 3.024967  | 2.503671  |
| 1  | 0 | -0.581143 | 2.715284  | 3.941311  |
| 1  | 0 | 0.975989  | 3.388341  | 3.391122  |
| 1  | 0 | -0.959413 | 4.877792  | 2.695227  |
| 45 | 0 | 0.174852  | -0.210668 | -0.466055 |
| 6  | 0 | -0.311317 | -0.695517 | -2.653418 |
| 1  | 0 | -0.333815 | 0.694171  | -1.704918 |
| 6  | 0 | 0.386448  | -1.778151 | -2.062873 |
| 1  | 0 | 1.454929  | -1.892311 | -2.205015 |
| 6  | 0 | -0.515846 | -3.006676 | -1.956873 |
| 1  | 0 | -0.843057 | -3.209196 | -0.933740 |
| 1  | 0 | 0.010302  | -3.898892 | -2.311648 |
| 6  | 0 | -1.711978 | -2.645865 | -2.871398 |
| 1  | 0 | -2.646763 | -3.133249 | -2.577415 |
| 1  | 0 | -1.495867 | -2.936117 | -3.905296 |
| 1  | 0 | 0.161140  | -0.038017 | -3.375953 |

TS15

|   |   |           |           |           |
|---|---|-----------|-----------|-----------|
| 5 | 0 | 0.831918  | -1.736529 | 0.252115  |
| 8 | 0 | -0.007654 | -1.903440 | 1.323000  |
| 8 | 0 | 1.936633  | -2.537989 | 0.275929  |
| 6 | 0 | 0.766587  | -2.609206 | 2.359679  |
| 6 | 0 | 1.886531  | -3.345851 | 1.507816  |
| 6 | 0 | 3.281038  | -3.324262 | 2.132005  |
| 1 | 0 | 3.639219  | -2.305437 | 2.286213  |
| 1 | 0 | 3.281654  | -3.849112 | 3.092977  |
| 1 | 0 | 3.983885  | -3.838023 | 1.469396  |
| 6 | 0 | 1.529802  | -4.778815 | 1.099086  |
| 1 | 0 | 1.570906  | -5.452789 | 1.960071  |
| 1 | 0 | 0.532573  | -4.855397 | 0.660333  |
| 1 | 0 | 2.254640  | -5.127668 | 0.358227  |
| 6 | 0 | -0.186886 | -3.531450 | 3.114650  |
| 1 | 0 | 0.354424  | -4.108471 | 3.871853  |
| 1 | 0 | -0.944730 | -2.932018 | 3.626793  |
| 1 | 0 | -0.698297 | -4.228725 | 2.448889  |
| 6 | 0 | 1.312845  | -1.529739 | 3.301907  |
| 1 | 0 | 0.472147  | -0.959061 | 3.705790  |
| 1 | 0 | 1.860804  | -1.972538 | 4.139046  |
| 1 | 0 | 1.976122  | -0.833603 | 2.781188  |
| 8 | 0 | -3.373535 | 0.491177  | -0.123051 |
| 6 | 0 | -3.695316 | -0.413276 | -0.891675 |
| 7 | 0 | -4.983726 | -0.768716 | -1.174397 |
| 1 | 0 | -5.099687 | -1.519377 | -1.842122 |
| 6 | 0 | -2.635107 | -1.271606 | -1.594735 |
| 1 | 0 | -2.988163 | -1.552612 | -2.596030 |

|    |   |           |           |           |
|----|---|-----------|-----------|-----------|
| 6  | 0 | -6.199699 | -0.244472 | -0.662700 |
| 6  | 0 | -7.389333 | -0.794733 | -1.166857 |
| 6  | 0 | -6.255049 | 0.771542  | 0.302914  |
| 6  | 0 | -8.624391 | -0.336839 | -0.712047 |
| 1  | 0 | -7.348401 | -1.582613 | -1.916271 |
| 6  | 0 | -7.502045 | 1.219094  | 0.748853  |
| 1  | 0 | -5.339826 | 1.196088  | 0.690349  |
| 6  | 0 | -8.687761 | 0.675114  | 0.250767  |
| 1  | 0 | -9.535502 | -0.772054 | -1.111373 |
| 1  | 0 | -7.539596 | 2.005264  | 1.497420  |
| 1  | 0 | -9.648784 | 1.033079  | 0.606481  |
| 6  | 0 | -0.153696 | -1.544017 | -1.599461 |
| 1  | 0 | 0.538631  | -1.593720 | -2.438032 |
| 45 | 0 | 0.674974  | 0.186089  | -0.543148 |
| 1  | 0 | -1.322776 | 0.261243  | -0.922909 |
| 6  | 0 | -1.292083 | -0.522603 | -1.760050 |
| 1  | 0 | -1.236468 | 0.053705  | -2.685467 |
| 15 | 0 | 0.753765  | 2.304976  | 0.420924  |
| 8  | 0 | 0.311672  | 3.557615  | -0.524771 |
| 8  | 0 | -0.321568 | 2.381049  | 1.641371  |
| 8  | 0 | 2.112736  | 2.866918  | 1.129501  |
| 6  | 0 | 0.223287  | 4.852434  | 0.150894  |
| 6  | 0 | -0.467390 | 3.692423  | 2.270739  |
| 6  | 0 | 1.962934  | 4.147148  | 1.822388  |
| 6  | 0 | 0.531046  | 4.682531  | 1.648061  |
| 1  | 0 | -0.790401 | 5.228304  | -0.013596 |
| 1  | 0 | 0.939792  | 5.520253  | -0.336590 |
| 1  | 0 | -1.503037 | 4.010168  | 2.118939  |
| 1  | 0 | -0.285805 | 3.553675  | 3.340338  |
| 1  | 0 | 2.202220  | 3.973774  | 2.875829  |
| 1  | 0 | 2.702100  | 4.829118  | 1.392139  |
| 1  | 0 | 0.443844  | 5.652709  | 2.150095  |
| 15 | 0 | 2.839072  | 0.157602  | -0.958818 |
| 8  | 0 | 3.279619  | -0.941313 | -2.077344 |
| 8  | 0 | 3.354254  | 1.549046  | -1.640412 |
| 8  | 0 | 3.931139  | -0.067127 | 0.225595  |
| 6  | 0 | 4.702782  | -0.954975 | -2.412026 |
| 6  | 0 | 4.740043  | 1.537669  | -2.106987 |
| 6  | 0 | 5.330255  | 0.029647  | -0.189142 |
| 6  | 0 | 5.415441  | 0.214037  | -1.712783 |
| 1  | 0 | 4.770293  | -0.876403 | -3.500651 |
| 1  | 0 | 5.103388  | -1.922325 | -2.093970 |
| 1  | 0 | 4.720077  | 1.674367  | -3.192468 |
| 1  | 0 | 5.235517  | 2.396239  | -1.644946 |
| 1  | 0 | 5.769899  | 0.876623  | 0.346295  |
| 1  | 0 | 5.818939  | -0.894286 | 0.132801  |
| 1  | 0 | 6.467449  | 0.235680  | -2.019092 |
| 6  | 0 | -2.255321 | -2.554739 | -0.815746 |
| 1  | 0 | -2.982605 | -3.360582 | -0.952811 |
| 1  | 0 | -2.183728 | -2.332800 | 0.253062  |
| 6  | 0 | -0.872808 | -2.908000 | -1.377874 |

|   |   |           |           |           |
|---|---|-----------|-----------|-----------|
| 1 | 0 | -0.331330 | -3.636052 | -0.775877 |
| 1 | 0 | -0.979919 | -3.353464 | -2.376677 |
